# Supplementary material for: Highly regioselective oxidation of C–H bonds in water using hydrogen peroxide by a cytochrome P450 mimicking iron complex
Source: Royal Society of Chemistry journal article supplement (doi:10.1039/d3sc03495j), 2023-01-01
Supplement: d3sc03495j1.pdf [file d3sc03495j1.pdf]

## Supporting Information

### Highly Regioselective Oxidation of C–H Bonds in Water using Hydrogen Peroxide by a Cytochrome P450 mimicking Iron Complex

Sandipan Jana,<sup>‡[a]</sup> Puja De,<sup>‡[a]</sup> Chinmay Dey,<sup>[b]</sup> Somdatta Ghosh Dey,<sup>‡[b]</sup> Abhishek Dey,<sup>‡[b]</sup> and Sayam Sen Gupta<sup>‡[a]</sup>

<sup>a</sup>Department of Chemical Sciences, Indian Institute of Science Education and Research, Kolkata; Mohanpur 741246, India.

<sup>b</sup>School of Chemical Sciences, Indian Association for the Cultivation of Science, Kolkata, West Bengal 700032

*[‡] These authors contributed equally to this work.*

| <b>Sl. No.</b> | <b>Table of contents</b>                                                                     | <b>Page No.</b> |
|----------------|----------------------------------------------------------------------------------------------|-----------------|
| 1              | Material and Methods                                                                         | S2              |
| 2              | General Instrumentations and Techniques                                                      | S2-S5           |
| 3              | Experimental Results                                                                         | S6              |
| 3A             | Synthesis of 2                                                                               | S6              |
| 3B             | Synthetic Procedures and Characterization Data                                               | S6-S29          |
| 3C             | Reactivity Studies                                                                           | S29-S30         |
| 3D             | Kinetic Studies                                                                              | S31-S33         |
| 3E             | Oxoiron(V) intermediate formation by mCPBA treatment in 100% water and its kinetic study     | S33-S40         |
| 3F             | High valent oxo intermediate formation by H <sub>2</sub> O <sub>2</sub> treatment            | S40-S42         |
| 3G             | Procedure for preparative hydroxylation reaction                                             | S42             |
| 3H             | Epoxidation Reaction Procedure                                                               | S42             |
| 3I             | Substrate scopes for C-H oxidation and epoxidation in CH <sub>3</sub> CN-water (1:1) solvent | S42-S46         |
| 3J             | Comparison Studies                                                                           | S46-S48         |
| 3K             | Product Characterization Data                                                                | S48-S76         |
| 4              | References                                                                                   | S76             |

## 1. Materials and Methods

Aqueous sodium hypochlorite solution (4% Chlorine), Merck, was used directly without any purification, meta-Chloroperoxybenzoic acid (*m*CPBA, Sigma Aldrich 77%) was purified following an established methodology.<sup>1</sup> Aqueous sodium hypochlorite (4 % available chlorine, Merck) (NaOCl) was used as purchased. Hydrogen peroxide (30%, Merck) (H<sub>2</sub>O<sub>2</sub>) was also used as purchased. Acetonitrile (LC-MS and HPLC grade, Sigma Aldrich) was passed through an activated neutral alumina column and distilled and used thereafter. All the other solvents required were purchased and used after distillation over drying agents. All the substrates required for hydroxylation and epoxidation were bought from TCI, Sigma Aldrich or Thermo-fischer scientific. Unless mentioned separately, the reactions were performed at room temperature under air. Analytical thin layer chromatography (TLC) was performed on TLC Silica gel 60 F254. Visualization was accomplished with short wave UV light or with ninhydrin and PMA staining solutions followed by heating. Purification of desired products were performed by column chromatography which was performed on silica gel (230-400 mesh or 100-200 mesh) by standard techniques eluting with solvents as indicated. NMR solvents were dried using pre-activated 4 Å molecular sieves. All indicated solvents were purified prior to use as per standard literature protocols. All the organic chemicals required for ligand synthesis (Sigma Aldrich, TCI India, Spectrochem) were used as received unless synthesized or mentioned; their purity was checked by GC. H<sub>2</sub>O<sup>18</sup> was purchased from Icon isotopes. For electrochemical experiments, Glassy Carbon, Platinum (wire and mesh), Ag/AgNO<sub>3</sub> (Non-aqueous), and Ag/AgCl (sat. KCl) electrodes were purchased from CH Instruments.

## 2. General Instrumentations and Techniques

<sup>1</sup>H and <sup>13</sup>C NMR spectra were recorded on Bruker AV 400 or JEOL 400 instruments in solvents as indicated. Chemical shifts ( $\delta$ ) are given in ppm. The residual solvent signals (CDCl<sub>3</sub> or DMSO-d<sub>6</sub>) were used as references and the chemical shifts converted to the TMS scale (CDCl<sub>3</sub>:  $\delta$ H = 7.26 ppm,  $\delta$ C = 77.16 ppm, or DMSO-d<sub>6</sub>:  $\delta$ H = 2.50 ppm,  $\delta$ C = 39.51 ppm).

All the cyclic voltammetry studies were carried out in CHI-660 potentiostat. UV-vis spectral studies were carried out using an Agilent diode array Cary-8454 spectrophotometer with an attached electrically controlled thermostat. GC-MS was performed on a Thermo Scientific ISQ QD Mass Spectrometer attached with Thermo Scientific TRACE 1300 gas chromatograph using an HP-5 ms capillary column (30 m  $\times$  0.25 mm  $\times$  0.25  $\mu$ m, J&W Scientific) with helium as the carrier gas. HRMS was performed in a Bruker micrOTOF-Q II Spectrometer.

### 2A. EPR Measurements

Electron Paramagnetic Resonance (EPR) spectroscopy was studied by a Bruker spectrometer (Bruker, EMXmicro) operating at X-band frequency (Microwave frequency 9.31 GHz) and magnetic field modulation of 100 kHz, with a microwave power of 48.83 mW and modulation amplitude of 10 G at 85 K.

**Treatment with mCPBA in CH<sub>3</sub>CN:** 3 mM **2** in CH<sub>3</sub>CN (200 μL) was taken in an EPR tube and the measurement was taken. For **3**, the same sample was then cooled to sub-zero temperature by intermittent cooling with liquid nitrogen followed by addition of 2 equiv mCPBA, and the measurement was taken at 100 K.

**Treatment with mCPBA in water:** 4 mM **2** in water (200 μL) was taken in an EPR tube followed by the addition of 20 mM pH 8.5 phosphate buffer. The EPR was cooled at sub-zero temperature by intermittent cooling with liquid N<sub>2</sub> (no freezing of the sample). Then 4 eq. mCPBA was added to the EPR tube, mixed properly and frozen it immediately and lastly given for measurement at 85 K.

**Treatment of Hydrogen peroxide:** 8 mM **2** in acetonitrile (80 μL) was taken in an EPR tube followed by the addition of aq. 10 mM pH 8.5 phosphate buffer (80 μL). The EPR was cooled at sub-zero temperature by intermittent cooling with liquid N<sub>2</sub> (no freezing of the sample). Then 5 eq. H<sub>2</sub>O<sub>2</sub> was added to the EPR tube and mixed properly and given for measurement at 85 K.

## **2B. Mössbauer Measurements**

Mössbauer spectra were recorded using an alternating constant Wissel Mössbauer spectrometer, consisting of an MR 360 drive unit, an MVT 1000 velocity transducer, and an LND-45431 proportional counter mounted on an MB-600 Mössbauer bench with cryostat stand. The system was operated in horizontal transmission geometry with source (<sup>57</sup>Co in Rh-matrix), absorber, and detector in a linear arrangement. The temperature was controlled and maintained using MBBC-N20106 Mössbauer cryostat for liquid-nitrogen connected with Lake Shore-325 temperature controller unit. Measurements were performed at 77 K. Data acquisition was performed using a 512 channel analyzer. Isomer shifts were referenced versus α-iron metal foil at the same temperature. The simulation of experimental data was performed using the Normos Site and Dist.

## **2C. Electrochemical Measurements**

Cyclic voltammetry and differential pulse voltammetry experiments were carried out in CHI-660 potentiostat instrument. Solutions of **2** were placed in simple undivided three electrode cells. Glassy Carbon (GC) (3 mm of diameter) was used as working electrode, Silver/Silver nitrate (10 mM) as reference electrode (unless explicitly mentioned) and Pt wire as counter electrode. Before each measurement, working electrode was polished with 0.05 μm alumina paste and rinsing with water/acetone and finally blow-drying.

## **2D. Single Crystal X-ray Diffraction (SCXRD) Measurements**

X-ray diffraction data for (Et<sub>4</sub>N)<sub>2</sub>[Fe-(Ph,Me-bTAML)]<sup>2-</sup> (**2**) crystal was collected at 100 K on a SuperNova, Eos diffractometer using monochromatic Mo-Kα radiation (λ = 0.71073 Å) and Cu-Kα radiation (λ = 1.54178 Å) having a 300 μm beam size. Using Olex2 (1.2.9 version)<sup>2</sup> the structure was solved using the SHELXT<sup>3</sup> structure solution program following an intrinsic phasing solution method and refined with the ShelXL<sup>4</sup> refinement package using Least Squares minimization. All the non-hydrogen atoms were refined anisotropically. All the crystal packing diagrams were prepared using Mercury (3.10.1 version) software.

## 2E. UV-Vis experiments

**Preparation of 3 by *m*CPBA or NaOCl:** Fe<sup>V</sup>(O), **3**, was prepared quantitatively at room temperature from the parent TAML activator, (Et<sub>4</sub>N)<sub>2</sub>[Fe<sup>III</sup>(Cl)(Ph,Me-*b*TAML)] (0.1 mM), **2**, in CH<sub>3</sub>CN by adding 1.2 equiv of *m*CPBA or NaOCl.

**Preparation of 3 by H<sub>2</sub>O<sub>2</sub>:** **3** was prepared at room temperature from the parent TAML activator, (Et<sub>4</sub>N)<sub>2</sub>[Fe<sup>III</sup>(Cl)(Ph,Me-*b*TAML)] (0.1 mM), **2**, in CH<sub>3</sub>CN:H<sub>2</sub>O (3:2), where the water part contains pH 8.5 phosphate buffer (5 equiv, 0.5 mM) by adding 2.5 to 5 equiv of H<sub>2</sub>O<sub>2</sub> (0.25-0.50 mM). The stock solution of the Fe<sup>III</sup> complex was prepared in acetonitrile whereas the stock solutions of phosphate buffer and hydrogen peroxide were made in distilled water. Same spectra were obtained when the acetonitrile-water ratio was varied from 4:1 to 1:1.

**Half-equivalent oxidant addition and comproportionation reaction:** 0.1 mM of **2** in acetonitrile was subjected to 0.5-0.6 equivalents of *m*CPBA and analyzed through UV-vis spectrometer. For the comproportionation reaction, equimolar amounts (0.1 mM in acetonitrile) of both **2** and **3** (from *m*CPBA) were mixed and UV-vis spectra were recorded.

## 2F. Rate Measurements from UV-Vis Kinetics

**Self-decay of 3 in CH<sub>3</sub>CN:** The spontaneous reduction or the self-decay of **3** to Fe<sup>IV</sup>/Fe<sup>III</sup> is monitored using UV spectral decay of its characteristic 625 nm band. The initial rate of decay was estimated to be first order with respect to the concentration of **3** and the decay first order rate constant ( $k_{5/4,3}$ ) was determined from the slope of the straight lines (obtained from several concentrations of **3**) at 298 K. The decay constant ( $k_{decay}$ ) value at 298K ( $6.0531 \times 10^{-4} \text{ s}^{-1}$ ;  $t_{1/2}$  of 19 mins) was found to be higher compared to **1A'** reported at the same temperature (Figure S33).

**Second-order rate constant ( $k_2$ ) determination in CH<sub>3</sub>CN:** The room temperature stability of **3** has prompted us to study the oxidation of strong and weak C-H bonds whose bond dissociation energies range from 97-75 kcal/mol. Starting from 2,3-dimethylbutane (BDE 96.5 kcal/mol) to xanthene (BDE 75.5 kcal/mol), we have performed the single turnover kinetics of five substrates wherein *m*CPBA is used for the formation of **3** (Figures S34 and S35). The reactions follow second order and the rates of these reactions were found to be around three times faster than the rates obtained for **1A'** (Table S3). The rate constants also vary linearly with BDEs of the substrates. Also, the linear free energy relationship was determined by using Bells-Evans-Polanyi (BEP) relation (Figure S36) where the plot was found to be linear for all the substrates from toluene to xanthene (slope -0.15); similar to the slope in case of **1A** (slope -0.17). This linearity supports hydrogen atom abstraction from C-H bond by **3** in the rate-determining step, as has been reported earlier.

**Stopped Flow UV Kinetics:** Stopped-flow analysis of the reaction of complexes **1A** and **2** with H<sub>2</sub>O<sub>2</sub> were performed on SFM 4000 stopped-flow absorption spectrophotometer (light source Xe lamp). The reactions were performed by mixing 0.25 mM of these complexes with

1.25 mM H<sub>2</sub>O<sub>2</sub> in 1:5 concentration ratio. The kinetic trace of 621 nm and 830 nm were followed.

## 2G. Magnetic moment measurements (Evans method NMR)

The Evans method makes use of differences in the <sup>1</sup>H NMR chemical shift in a solvent caused by the presence of a paramagnetic species. It can be used to calculate the magnetic moment of the species and the number of unpaired electrons present. Two coaxial NMR tubes were used in which a CD<sub>3</sub>CN solution of the paramagnetic sample is introduced into the outer tube, and only CD<sub>3</sub>CN (without the sample) is filled in the inner tube. The concentration of TMS was identical in both tubes. The NMR spectra were recorded in a 400 MHz NMR instrument. The effective spin-only magnetic moment was calculated by a simplified Evans method analysis<sup>17</sup> according to the following equation:

$$\mu_{eff} = 0.0618 \sqrt{\frac{\Delta\nu T}{2fM}}$$

where f is the oscillator frequency (MHz) of the superconducting spectrometer (f = 400 MHz), T is the temperature (K) (T = 297 K), M is the molar concentration of the paramagnetic metal complex, and Δν is the difference in frequency (Hz) between the two reference (TMS) signals.

### 3. Experimental Results

#### 3A. Synthesis of 2:

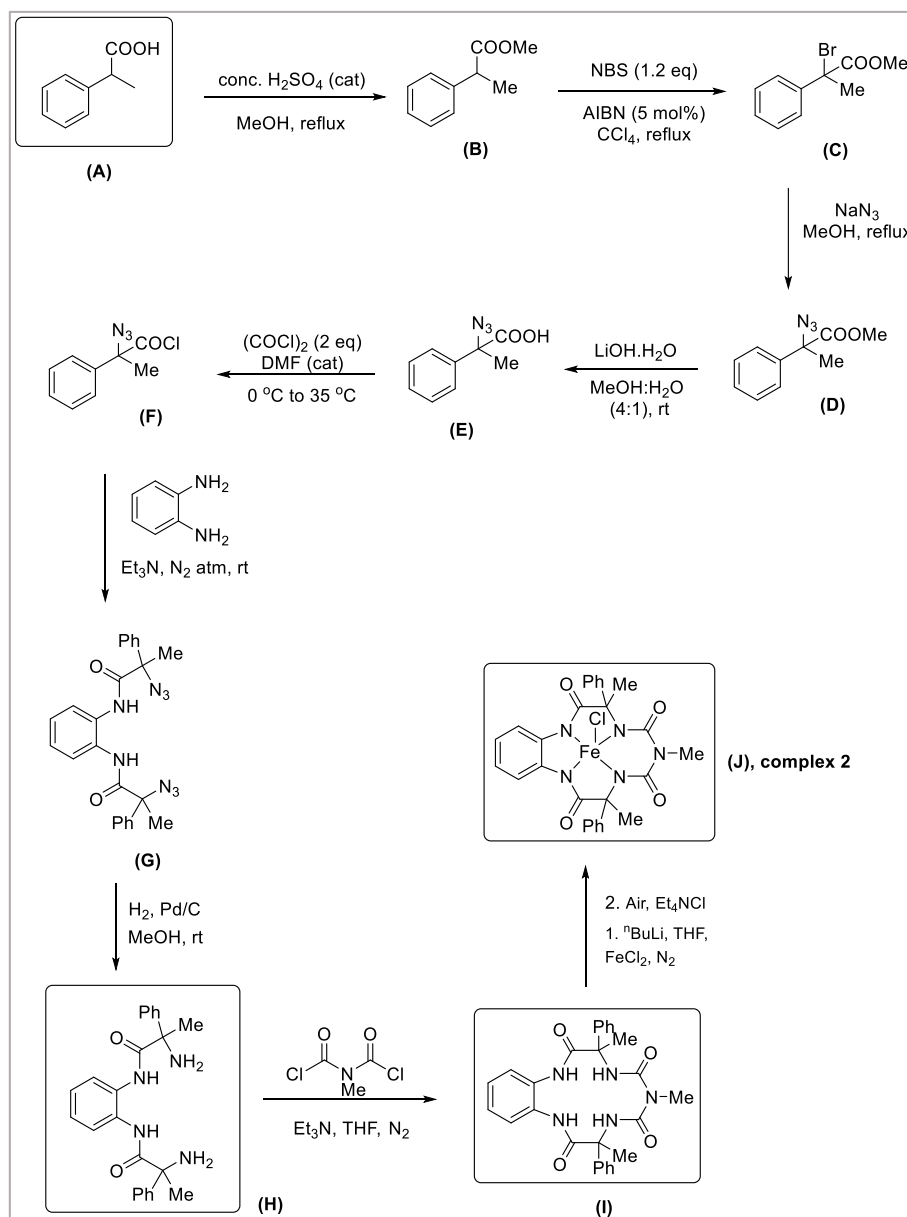

**Scheme S1:** Synthesis of a modified bTAML system (Ph,Me-bTAML) and its corresponding Fe complex

#### 3B. Synthetic Procedures and Characterization Data

##### Methyl 2-phenylpropanoate<sup>6</sup> (B)

2-phenylpropanoic acid (A) (6 g, racemic) was dissolved in methanol (54 mL) in a 250 mL RB. Conc. Sulphuric acid (H<sub>2</sub>SO<sub>4</sub>) (98%, 300  $\mu$ L) was then added and the reaction was refluxed (65  $^\circ$ C) for 8 h. After completion (checked by TLC), the reaction solution was allowed to come at room temperature and was concentrated to half volume. Hexane (100 mL) was added

followed by sat. aq. NaHCO<sub>3</sub> (30 mL) solution. The organic layer was separated via separating funnel and aqueous part was discarded. The organic part was again washed once with water and once with brine (sat. NaCl solution), and then dried with anhydrous Na<sub>2</sub>SO<sub>4</sub>, and concentrated to get pure product (B) as viscous liquid. Yield quantitative, 6 g (92%). TLC done in 10% EA-hexane.

<sup>1</sup>H NMR (400 MHz, CDCl<sub>3</sub>) δ 7.37-7.28 (m, 5 H), 3.78-3.73 (q, J = 7.2 Hz, 1 H), 3.69 (s, 3 H), 1.54-1.52 (d, J = 8 Hz, 3 H).

<sup>13</sup>C NMR (400 MHz, CDCl<sub>3</sub>) δ 174.98, 140.55, 128.62, 127.45, 127.11, 51.98, 45.41, 18.57

GC-MS (EI) m/z: M<sup>+</sup> peak:164.12

### <sup>1</sup>H NMR:

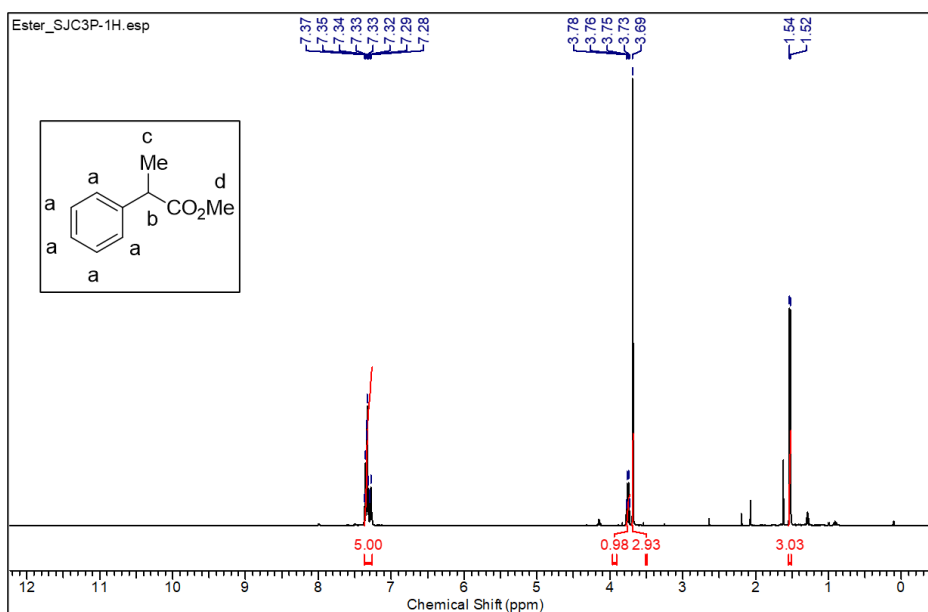

Figure S1. <sup>1</sup>H NMR of B

### <sup>13</sup>C NMR:

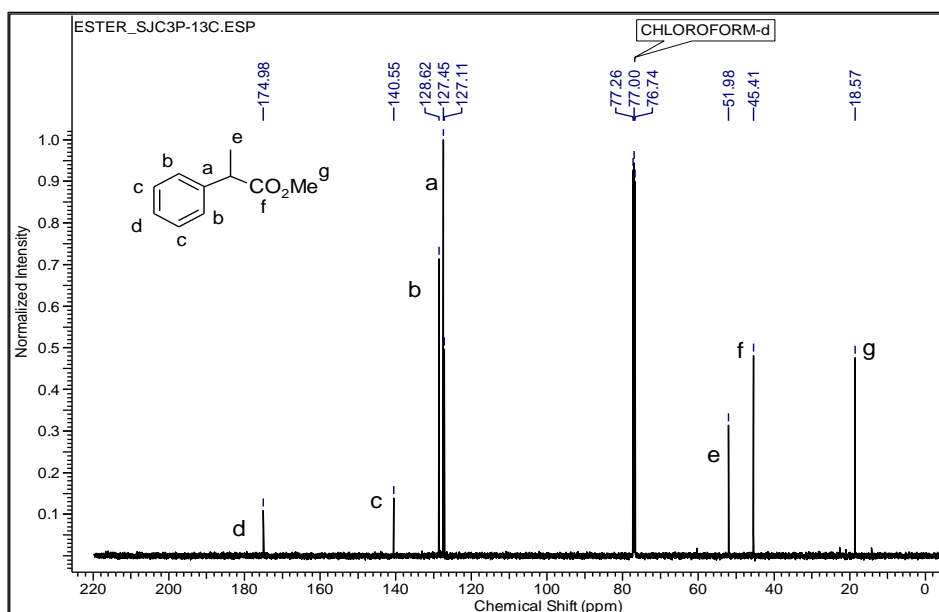

Figure S2.  $^{13}\text{C}$  NMR of B

### Methyl 2-bromo-2-phenylpropanoate<sup>7</sup> (C)

In a 250 mL RB, 60 mL carbon tetrachloride ( $\text{CCl}_4$ ) was added to 4 g of ester (B) followed by addition of 5.2 gm (1.2 eq) of N-bromosuccinimide (NBS) and 200 mg (5 mol%) AIBN. The reaction mixture was refluxed at 80 °C for 6-8 h. The colour changes to orange with time. After completion, the reaction mixture was allowed to cool till room temperature and then filtered via frit funnel using celite. The filtrate was concentrated and purified by column chromatography to get pale yellow liquid as product. Yield quantitative, 5.7 g (96%). TLC at 10% EA-hexane.

Ref: PCT Int. Appl. (2011), WO 2011149921 A1 Dec 01, 2011

$^1\text{H}$  NMR (400 MHz,  $\text{CDCl}_3$ )  $\delta$  7.57-7.32 (m, 5H), 3.81 (s, 3H), 2.32 (s, 3H)

$^{13}\text{C}$  NMR (400 MHz,  $\text{CDCl}_3$ )  $\delta$  171.50, 140.94, 128.37, 126.71, 61.71, 53.56, 31.34

GC-MS (EI) m/z:  $\text{M}^+$  peak: 241.97, 243.98

**$^1\text{H}$  NMR:**



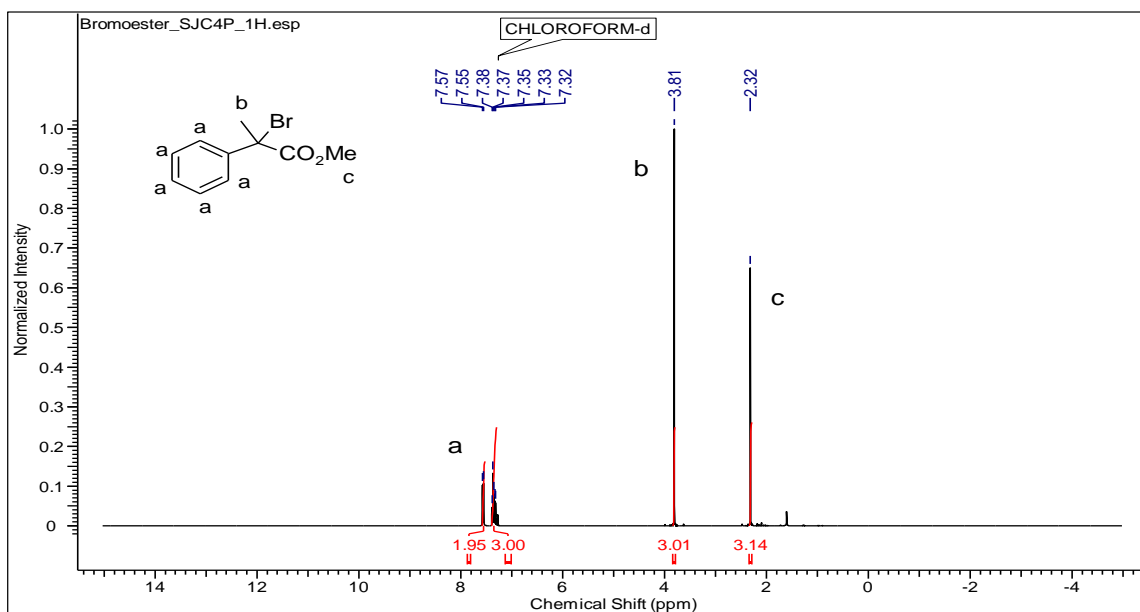

Figure S3.  $^1\text{H}$  NMR of C

$^{13}\text{C}$  NMR:

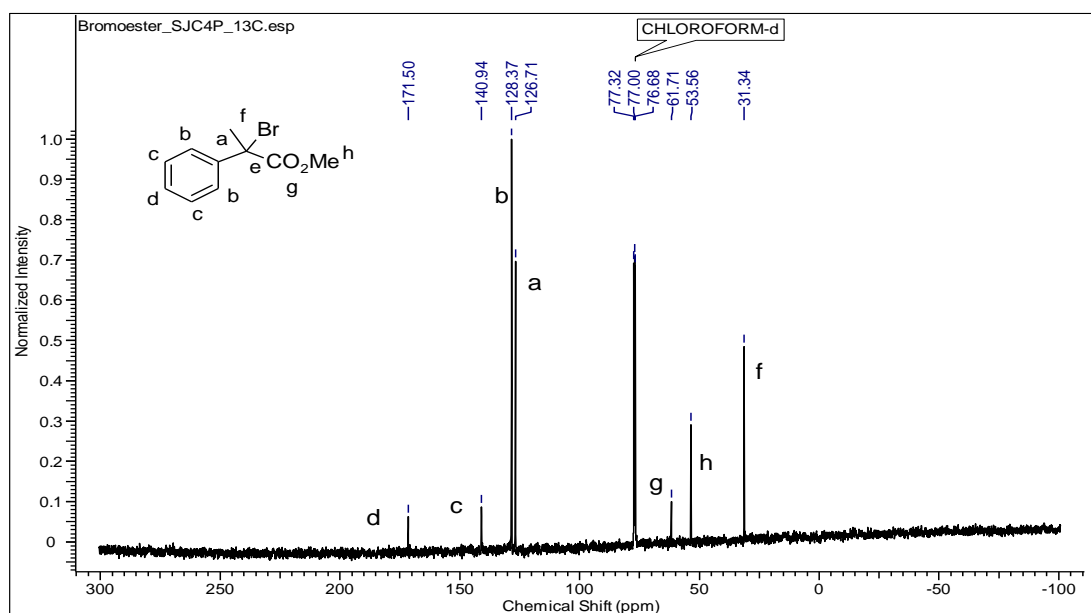

Figure S4.  $^{13}\text{C}$  NMR of C

### IR Data of Bromo Ester:

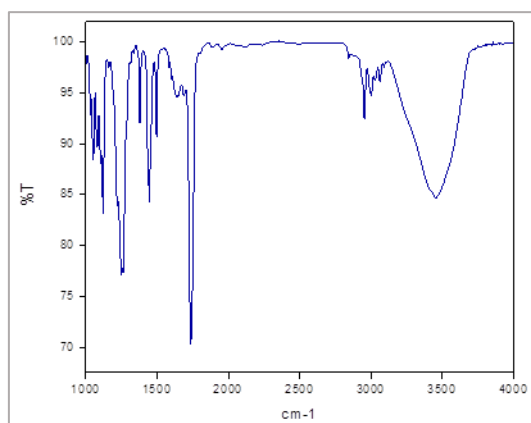

Figure S5. IR spectrum of C

### Methyl 2-azido-2-phenylpropanoate (D)

To a solution of 4 g bromo-ester (C) in 80 mL methanol, taken in a 250 mL RB, was added 5 eq. sodium azide (5.3 g), and the mixture was refluxed at 65 °C for 12 h. After completion, most of the methanol was rota-evaporated (rem. 20 mL), and the mixture was diluted with 100 mL ethyl acetate. It was then washed with brine solution (2-3 times), where excess sodium azide got separated. The organic part was dried with anhydrous sodium sulphate and concentrated to get pure product as yellow viscous liquid. Yield obtained was 3.2 g (95%). TLC done at 10% EA-hexane.

$^1\text{H}$  NMR (400 MHz,  $\text{CDCl}_3$ )  $\delta$  7.41-7.42 (m, 5H), 3.81 (s, 3H), 1.84 (s, 3H)

$^{13}\text{C}$  NMR (400 MHz,  $\text{CDCl}_3$ )  $\delta$  171.99, 138.83, 128.80, 128.52, 125.57, 69.23, 53.11, 24.36

$^1\text{H}$  NMR:

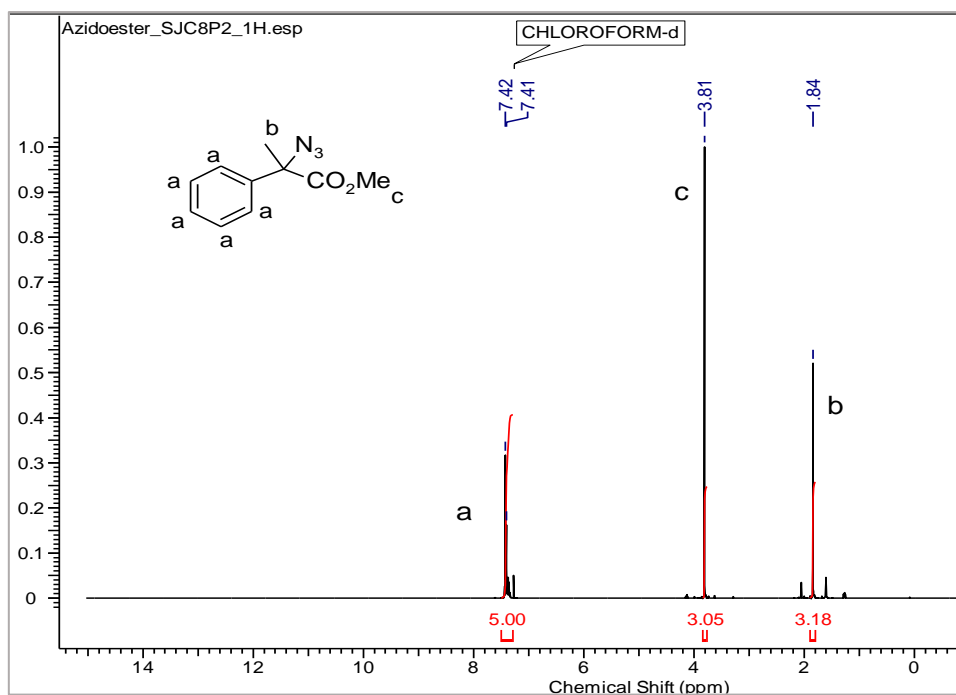

Figure S6.  $^1\text{H}$  NMR of D

$^{13}\text{C}$  NMR:

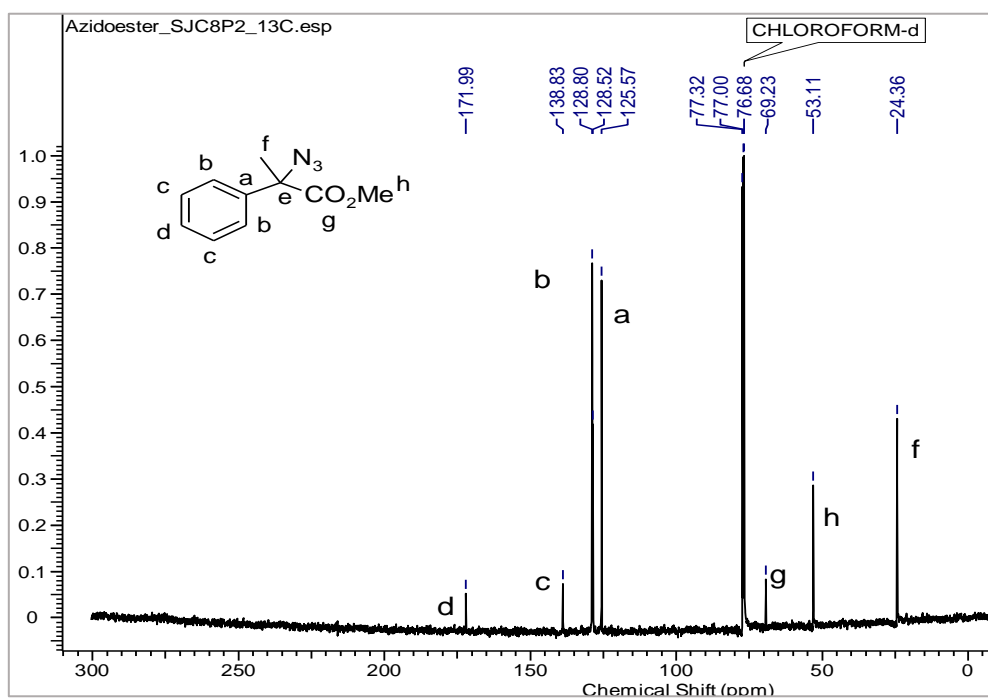

Figure S7.  $^{13}\text{C}$  NMR of D

IR Data of Azido Ester:

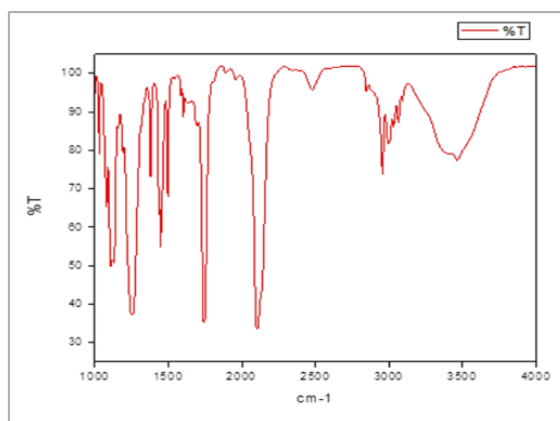

Figure S8. IR spectrum of D

**Comparison between bromo and azido ester (2100  $\text{cm}^{-1}$  peak for azido group):**

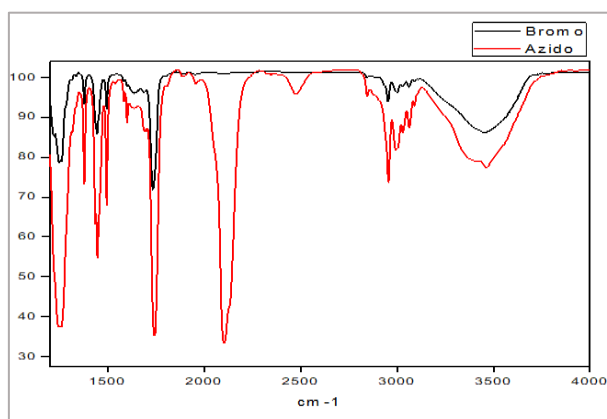

Figure S9. Comparison of IR spectra between C and D

### **2-Azido-2-phenylpropanoic acid (E)**

In a 100 mL RB, 3 g of azido ester (D) was taken and 50 mL MeOH-water (4:1) was added, followed by the addition of 1.84 g (3 eq.) of lithium hydroxide monohydrate. The mixture was stirred at room temperature for 8 h. After completion, the reaction was quenched with 60 mL 1(N) cold HCl till pH reaches 1-2. Then, the resulting mixture was extracted with ethyl acetate (4 times). The combined organic part was washed with brine and then dried ( $\text{Na}_2\text{SO}_4$ ) and concentrated to get semi-liquid product. TLC done at 10% EA-hexane.

$^1\text{H}$  NMR (400 MHz,  $\text{CDCl}_3$ )  $\delta$  7.51-7.40 (m, 5H), 1.94 (s, 3H)

$^{13}\text{C}$  NMR (400 MHz,  $\text{CDCl}_3$ )  $\delta$  176.64, 138.07, 128.87, 125.75, 68.84, 23.84

FT-IR: Characteristic azido group peak at  $2100\text{ cm}^{-1}$

**$^1\text{H}$  NMR:**

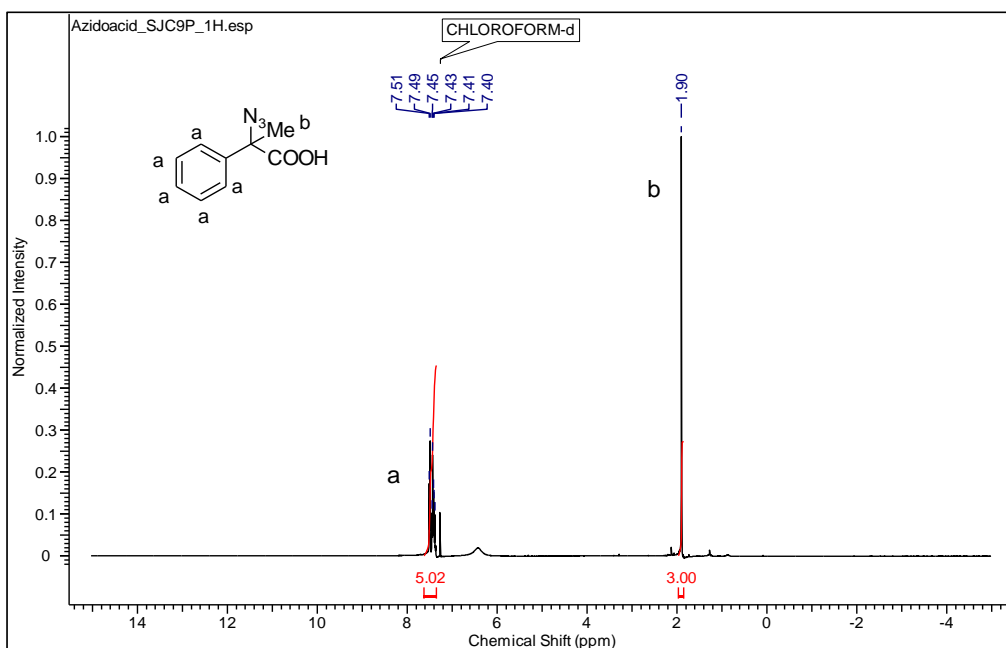

Figure S10.  $^1\text{H}$  NMR of E

$^{13}\text{C}$  NMR:

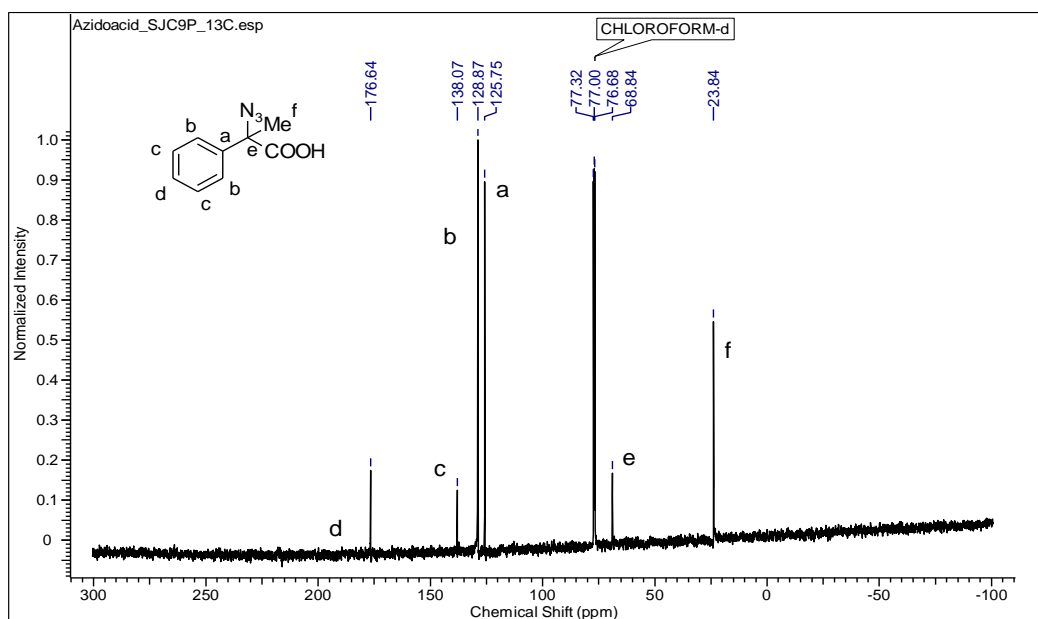

Figure S11.  $^{13}\text{C}$  NMR of E

## 2-Azido-2-phenylpropanoyl chloride (F)

In a 100 mL 2-neck RB, 2.54 g of E was taken and 30 mL dry DCM was added under inert atmosphere. At 0 °C, 2.3 mL oxalyl chloride (2 eq.) was added slowly followed by addition of catalytic amount (250  $\mu\text{L}$ ) of DMF (strong effervescence was observed after DMF addition). 0 °C was maintained for 15 mins. Then, the reaction was allowed to come to room temperature and slightly heated to 35 °C (with warm water). The reaction was continued for 4 h. The solvent was then evaporated by using a vacuum trap in liquid nitrogen. The RB content was washed

with hexane twice followed by drying under high vacuum. It was used as such for the next step (calculated 80% yield).

### **N,N'-(1,2-phenylene)bis(2-azido-2-phenylpropanamide) (G)**

Everything was under N<sub>2</sub> atmosphere. Acid chloride (F) solution (2.2 eq) was prepared by adding 35 mL dry THF in that 2-neck RB used in the previous step. In another 250 mL 2-neck RB, 560 mg of 1,2-phenylene diamine (1 eq) was taken and 30 mL dry THF was added to it. At 0 °C, 1.75 mL of dry triethylamine (2.4 eq.) was added to the diamine solution. The acid chloride solution was then added dropwise to the amine solution (for 20 mins). After addition, the temperature was maintained at 0 °C for 10 more mins, followed by stirring for 15 h at room temperature. After completion, the reaction mixture was filtered via frit funnel to remove insoluble salts. The filtrate was rota-evaporated to complete dryness, followed by the addition of sufficient amount of DCM to solubilize it well. The DCM solution was washed twice with 1(N) HCl and twice with sat aq. NaHCO<sub>3</sub> solution and once with brine. The solution was then dried with Na<sub>2</sub>SO<sub>4</sub> and concentrated to get pure G as a dark coloured semi-liquid compound. The yield obtained was 75% w.r.t. amine.

<sup>1</sup>H NMR (400 MHz, CDCl<sub>3</sub>) δ 8.62 (s, 2H), 7.34-6.94 (m, 10H), 1.84 (s, 3H), 1.79 (s, 3H)

<sup>13</sup>C NMR (400 MHz, CDCl<sub>3</sub>) δ 169.76, 138.76, 129.68, 129.68, 129.61, 128.66, 128.44, 126.26, 125.77, 125.05, 124.88, 22.62, 22.43

HRMS: 455.1928 (M+H) [calc'd 455.1938 (M+H)]

#### **<sup>1</sup>H NMR:**

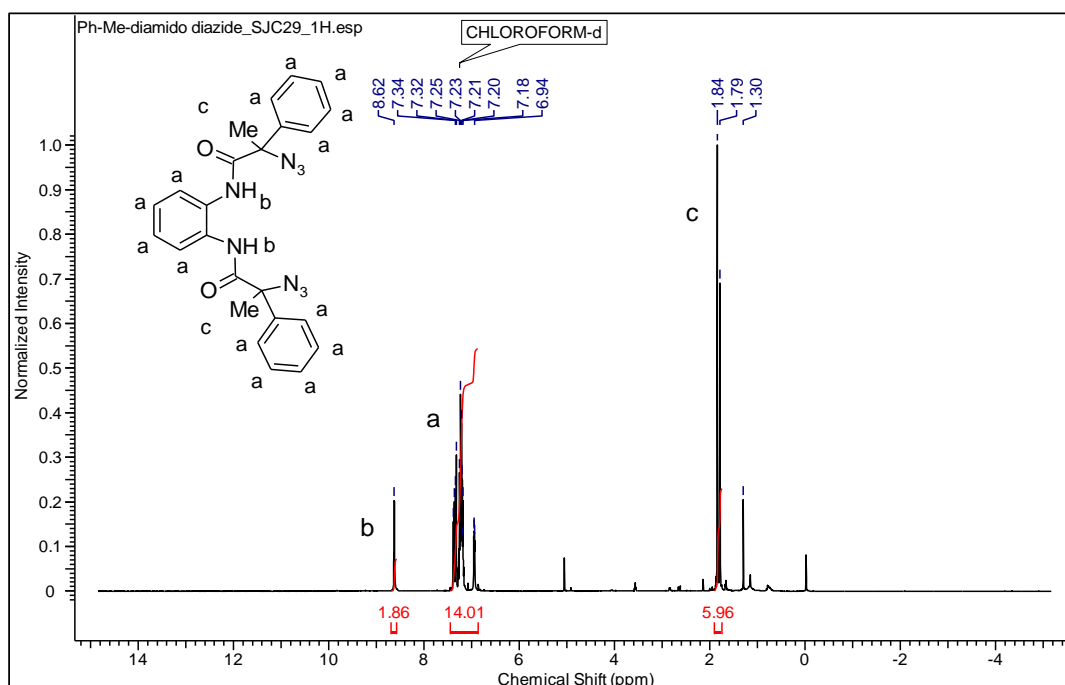

Figure S12. <sup>1</sup>H NMR of G

## <sup>13</sup>C NMR:

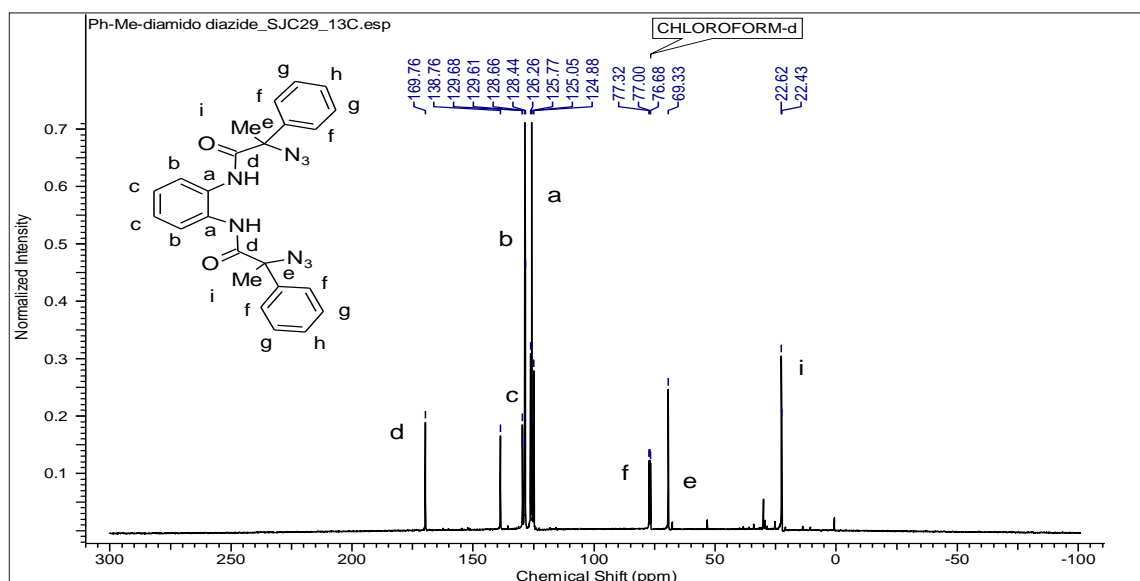

Figure S13. <sup>13</sup>C NMR of G

### **N,N'-(1,2-phenylene)bis(2-amino-2-phenylpropanamide) (H)**

300 mg of the diamide (G) was taken a 50 mL RB and 30 mL dry methanol was added to it. Under hydrogen atmosphere (double balloon), 60-70 mg of 10% Pd/Charcoal (Sigma Aldrich) (20-25 wt%) was added. The reaction mixture was stirred under H<sub>2</sub> for 12 h at room temperature. After completion, the reaction mixture was filtered via frit funnel using celite. The filtrate was rota-evaporated to dryness to get pure H. Yield obtained was 85%.

<sup>1</sup>H NMR (400 MHz, DMSO-d<sub>6</sub>) δ 7.60-7.26 (m, 14H), 5.02 (broad, 4H), 1.69 (s, 6H)

<sup>13</sup>C NMR (400 MHz, DMSO-d<sub>6</sub>) δ 174.79, 145.41, 130.80, 128.06, 126.79, 125.63, 124.95, 124.14, 60.64, 28.06

HRMS: 403.2152 (M+H), 425.1955 (M+Na) [calc'd 403.2134 (M+H)]

**\*\*The macrocyclization and metalation procedures were same as reported for bTAML synthesis<sup>8</sup> (see I and J).**

## <sup>1</sup>H NMR:

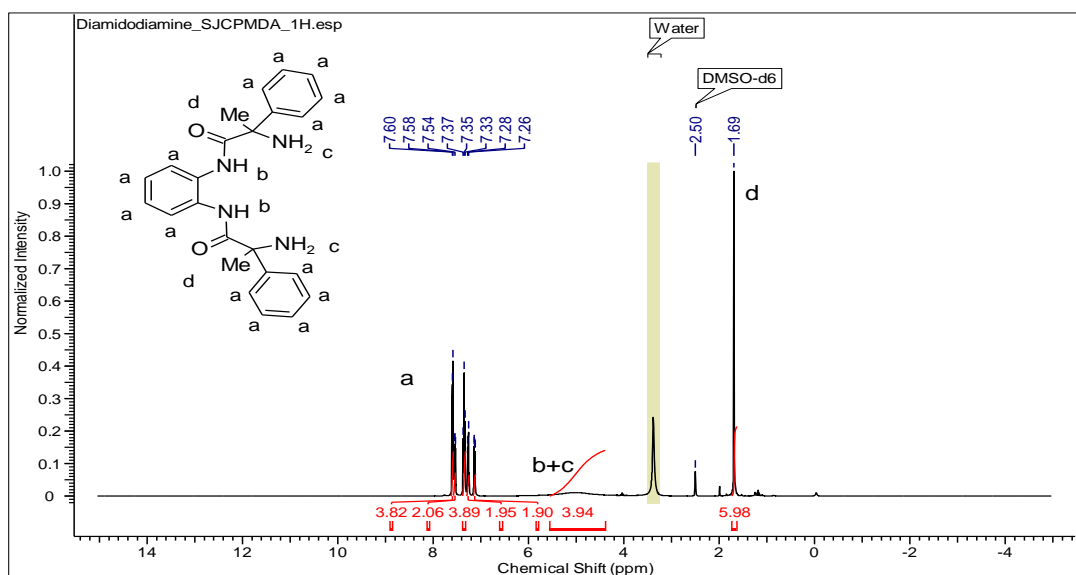

Figure S14. <sup>1</sup>H NMR of H

## <sup>13</sup>C NMR:

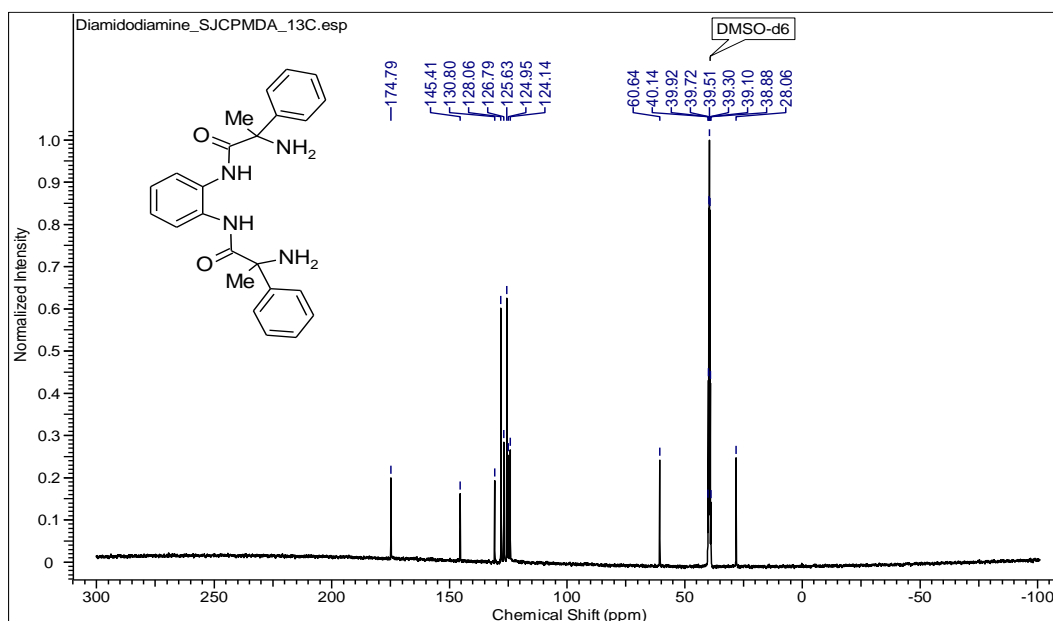

Figure S15. <sup>13</sup>C NMR of H



## HRMS:

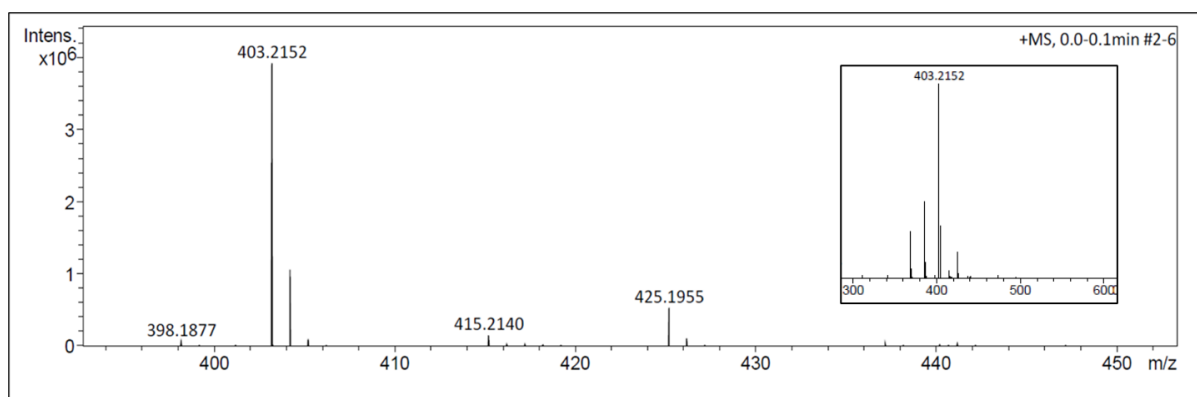

Figure S16. HRMS of H

## Macrocycle (Ph,Me-bTAML) (I)

$^1\text{H}$  NMR (400 MHz,  $\text{CDCl}_3$ )  $\delta$  8.35 (s, 2H), 7.71 (s, 2H), 7.43-7.27 (m, 14H), 2.50 (s, 3H), 1.63 (s, 3H), 1.62 (s, 3H)

$^{13}\text{C}$  NMR (400 MHz,  $\text{CDCl}_3$ )  $\delta$  171.96, 157.35, 141.85, 129.47, 128.52, 126.90, 124.48, 66.38, 30.93, 26.15, Yield 29%

HRMS: 486.2136 (M+H), 508.1956 (M+Na), 524.1693 (M+K) [calc'd 485.2063 ( $\text{M}^+$ ), 486.2141 (M+H)]

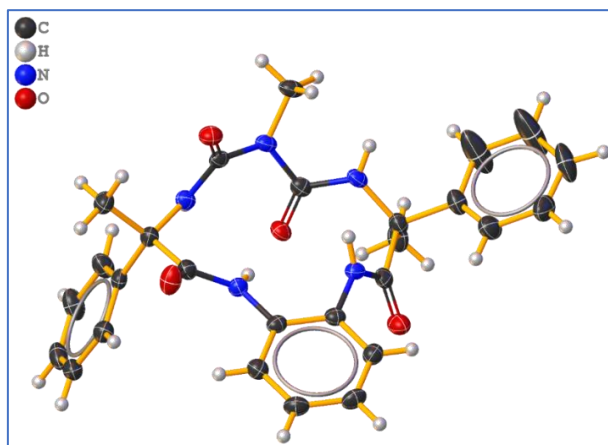

Figure S17. Model diagram of the crystal structure of the macrocycle (Ph,Me-bTAML)

Table S1a. Data collection and structure refinement parameters of macrocycle (Ph,Me-bTAML, I):

|                     |                                                  |
|---------------------|--------------------------------------------------|
| Identification code | 2225607                                          |
| Formula             | $\text{C}_{27}\text{H}_{27}\text{N}_5\text{O}_4$ |
| Formula weight      | 485.54                                           |

|                                                              |                                                                              |
|--------------------------------------------------------------|------------------------------------------------------------------------------|
| Crystal colour, habit                                        | White                                                                        |
| <i>T</i> / K                                                 | 293 K                                                                        |
| Crystal system                                               | Monoclinic                                                                   |
| Space group                                                  | P2 <sub>1</sub> /c                                                           |
| <i>a</i> /Å                                                  | 11.9001(2)                                                                   |
| <i>b</i> /Å                                                  | 19.1517(3)                                                                   |
| <i>c</i> /Å                                                  | 10.5986(1)                                                                   |
| $\alpha$ /°                                                  | 90                                                                           |
| $\beta$ /°                                                   | 102.996(2)                                                                   |
| $\gamma$ /°                                                  | 90                                                                           |
| <i>V</i> /Å <sup>3</sup>                                     | 2353.63(6)                                                                   |
| <i>Z</i>                                                     | 4                                                                            |
| <i>D<sub>c</sub></i> /g cm <sup>-3</sup>                     | 1.370                                                                        |
| F(000)                                                       | 1024.0                                                                       |
| Crystal size/mm <sup>3</sup>                                 | 0.08 × 0.06 × 0.02                                                           |
| Radiation                                                    | CuK $\alpha$ ( $\lambda$ = 1.54184)                                          |
| 2 $\theta$ range for data collection/°                       | 8.916 to 136.56                                                              |
| Index ranges                                                 | -13 ≤ <i>h</i> ≤ 14, -22 ≤ <i>k</i> ≤ 22, -12 ≤ <i>l</i> ≤ 12                |
| Reflections collected                                        | 13674                                                                        |
| Independent reflections                                      | 4256 [ <i>R</i> <sub>int</sub> = 0.0368, <i>R</i> <sub>sigma</sub> = 0.0363] |
| Data/restraints/parameters                                   | 4256/0/328                                                                   |
| Goodness-of-fit on <i>F</i> <sup>2</sup>                     | 1.059                                                                        |
| Final <i>R</i> indexes [ <i>I</i> ≥ 2 $\sigma$ ( <i>I</i> )] | <i>R</i> <sub>1</sub> = 0.0621, <i>wR</i> <sub>2</sub> = 0.1674              |
| Final <i>R</i> indexes [all data]                            | <i>R</i> <sub>1</sub> = 0.0704, <i>wR</i> <sub>2</sub> = 0.1758              |
| Largest diff. peak/hole / e Å <sup>-3</sup>                  | 2.02/-0.50                                                                   |

$${}^a R_1 = \Sigma ||F_o| - |F_c|| / \Sigma |F_o|. \quad {}^b wR_2 = \{ \Sigma [w (|F_o|^2 - |F_c|^2)^2] / \Sigma [w (|F_o|^2)^2] \}^{1/2}.$$

Table S1b. All bond lengths for **I**

| Atom1 | Atom2 | Length (Å) | Atom1 | Atom2 | Length (Å) |
|-------|-------|------------|-------|-------|------------|
| O3    | C18   | 1.232(2)   | C3    | H3    | 0.93       |
| O2    | C16   | 1.228(3)   | C3    | C4    | 1.383(3)   |
| O1    | C7    | 1.219(3)   | C19   | C20   | 1.534(3)   |
| O4    | C27   | 1.224(3)   | C10   | C11   | 1.361(4)   |
| N5    | H5    | 0.86       | C10   | C15   | 1.393(6)   |
| N5    | C1    | 1.422(3)   | C4    | H4A   | 0.93       |
| N5    | C27   | 1.362(3)   | C17   | H17A  | 0.96       |
| N1    | H1    | 0.86       | C17   | H17B  | 0.96       |
| N1    | C6    | 1.428(3)   | C17   | H17C  | 0.96       |
| N1    | C7    | 1.357(3)   | C26   | H26   | 0.93       |

|     |     |          |  |     |      |          |
|-----|-----|----------|--|-----|------|----------|
| N4  | H4  | 0.86     |  | C26 | C25  | 1.386(4) |
| N4  | C18 | 1.349(3) |  | C20 | H20A | 0.96     |
| N4  | C19 | 1.478(3) |  | C20 | H20B | 0.96     |
| N2  | H2  | 0.86     |  | C20 | H20C | 0.96     |
| N2  | C16 | 1.354(3) |  | C9  | H9A  | 0.96     |
| N2  | C8  | 1.476(3) |  | C9  | H9B  | 0.96     |
| N3  | C18 | 1.416(3) |  | C9  | H9C  | 0.96     |
| N3  | C16 | 1.415(3) |  | C22 | H22  | 0.931    |
| N3  | C17 | 1.466(3) |  | C22 | C23  | 1.390(4) |
| C1  | C6  | 1.401(3) |  | C25 | H25  | 0.931    |
| C1  | C2  | 1.395(3) |  | C25 | C24  | 1.382(4) |
| C6  | C5  | 1.383(3) |  | C24 | H24  | 0.93     |
| C7  | C8  | 1.550(4) |  | C24 | C23  | 1.371(5) |
| C21 | C19 | 1.534(3) |  | C23 | H23  | 0.93     |
| C21 | C26 | 1.389(4) |  | C11 | H11  | 0.93     |
| C21 | C22 | 1.386(4) |  | C11 | C12  | 1.391(4) |
| C2  | H2A | 0.93     |  | C12 | H12  | 0.93     |
| C2  | C3  | 1.386(4) |  | C12 | C13  | 1.354(5) |
| C27 | C19 | 1.555(3) |  | C13 | H13  | 0.93     |
| C5  | H5A | 0.93     |  | C13 | C14  | 1.400(6) |
| C5  | C4  | 1.391(3) |  | C15 | H15  | 0.929    |
| C8  | C10 | 1.534(4) |  | C15 | C14  | 1.384(6) |
| C8  | C9  | 1.534(3) |  | C14 | H14  | 0.93     |

Table S1c. All bond angles for **I**

| Atom1 | Atom2 | Atom3 | Angle/°  | Atom1 | Atom2 | Atom3 | Angle/°  |
|-------|-------|-------|----------|-------|-------|-------|----------|
| H5    | N5    | C1    | 117.2    | C27   | C19   | C20   | 110.3(2) |
| H5    | N5    | C27   | 117.2    | C8    | C10   | C11   | 123.3(2) |
| C1    | N5    | C27   | 125.7(2) | C8    | C10   | C15   | 118.5(3) |

|     |     |     |          |  |      |     |      |          |
|-----|-----|-----|----------|--|------|-----|------|----------|
| H1  | N1  | C6  | 118.3    |  | C11  | C10 | C15  | 118.1(3) |
| H1  | N1  | C7  | 118.4    |  | C5   | C4  | C3   | 119.6(2) |
| C6  | N1  | C7  | 123.3(2) |  | C5   | C4  | H4A  | 120.2    |
| H4  | N4  | C18 | 118.8    |  | C3   | C4  | H4A  | 120.3    |
| H4  | N4  | C19 | 118.8    |  | N3   | C17 | H17A | 109.5    |
| C18 | N4  | C19 | 122.5(2) |  | N3   | C17 | H17B | 109.4    |
| H2  | N2  | C16 | 119.5    |  | N3   | C17 | H17C | 109.5    |
| H2  | N2  | C8  | 119.5    |  | H17A | C17 | H17B | 109.5    |
| C16 | N2  | C8  | 121.1(2) |  | H17A | C17 | H17C | 109.5    |
| C18 | N3  | C16 | 117.3(2) |  | H17B | C17 | H17C | 109.5    |
| C18 | N3  | C17 | 114.6(2) |  | C21  | C26 | H26  | 119.6    |
| C16 | N3  | C17 | 119.7(2) |  | C21  | C26 | C25  | 120.8(2) |
| N5  | C1  | C6  | 119.0(2) |  | H26  | C26 | C25  | 119.6    |
| N5  | C1  | C2  | 121.4(2) |  | C19  | C20 | H20A | 109.5    |
| C6  | C1  | C2  | 119.5(2) |  | C19  | C20 | H20B | 109.5    |
| O3  | C18 | N4  | 124.4(2) |  | C19  | C20 | H20C | 109.5    |
| O3  | C18 | N3  | 119.8(2) |  | H20A | C20 | H20B | 109.5    |
| N4  | C18 | N3  | 115.8(2) |  | H20A | C20 | H20C | 109.5    |
| N1  | C6  | C1  | 120.0(2) |  | H20B | C20 | H20C | 109.5    |
| N1  | C6  | C5  | 120.2(2) |  | C8   | C9  | H9A  | 109.4    |
| C1  | C6  | C5  | 119.8(2) |  | C8   | C9  | H9B  | 109.5    |
| O1  | C7  | N1  | 123.4(2) |  | C8   | C9  | H9C  | 109.4    |
| O1  | C7  | C8  | 120.2(2) |  | H9A  | C9  | H9B  | 109.5    |
| N1  | C7  | C8  | 116.4(2) |  | H9A  | C9  | H9C  | 109.5    |
| C19 | C21 | C26 | 119.8(2) |  | H9B  | C9  | H9C  | 109.5    |
| C19 | C21 | C22 | 121.8(2) |  | C21  | C22 | H22  | 119.6    |
| C26 | C21 | C22 | 118.2(2) |  | C21  | C22 | C23  | 120.8(3) |
| O2  | C16 | N2  | 122.9(2) |  | H22  | C22 | C23  | 119.6    |
| O2  | C16 | N3  | 121.8(2) |  | C26  | C25 | H25  | 119.9    |

|     |     |     |          |  |     |     |     |          |
|-----|-----|-----|----------|--|-----|-----|-----|----------|
| N2  | C16 | N3  | 115.2(2) |  | C26 | C25 | C24 | 120.2(2) |
| C1  | C2  | H2A | 120      |  | H25 | C25 | C24 | 119.9    |
| C1  | C2  | C3  | 120.0(2) |  | C25 | C24 | H24 | 120.3    |
| H2A | C2  | C3  | 120      |  | C25 | C24 | C23 | 119.5(3) |
| O4  | C27 | N5  | 123.8(2) |  | H24 | C24 | C23 | 120.2    |
| O4  | C27 | C19 | 121.1(2) |  | C22 | C23 | C24 | 120.3(3) |
| N5  | C27 | C19 | 115.0(2) |  | C22 | C23 | H23 | 119.9    |
| C6  | C5  | H5A | 119.7    |  | C24 | C23 | H23 | 119.8    |
| C6  | C5  | C4  | 120.6(2) |  | C10 | C11 | H11 | 119.3    |
| H5A | C5  | C4  | 119.7    |  | C10 | C11 | C12 | 121.4(3) |
| N2  | C8  | C7  | 110.7(2) |  | H11 | C11 | C12 | 119.3    |
| N2  | C8  | C10 | 107.3(2) |  | C11 | C12 | H12 | 119.6    |
| N2  | C8  | C9  | 110.5(2) |  | C11 | C12 | C13 | 120.8(3) |
| C7  | C8  | C10 | 109.9(2) |  | H12 | C12 | C13 | 119.6    |
| C7  | C8  | C9  | 108.4(2) |  | C12 | C13 | H13 | 120.8    |
| C10 | C8  | C9  | 109.9(2) |  | C12 | C13 | C14 | 118.4(3) |
| C2  | C3  | H3  | 119.7    |  | H13 | C13 | C14 | 120.8    |
| C2  | C3  | C4  | 120.6(2) |  | C10 | C15 | H15 | 119.9    |
| H3  | C3  | C4  | 119.7    |  | C10 | C15 | C14 | 120.3(4) |
| N4  | C19 | C21 | 108.5(2) |  | H15 | C15 | C14 | 119.9    |
| N4  | C19 | C27 | 109.5(2) |  | C13 | C14 | C15 | 120.3(4) |
| N4  | C19 | C20 | 112.0(2) |  | C13 | C14 | H14 | 119.8    |
| C21 | C19 | C27 | 108.7(2) |  | C15 | C14 | H14 | 119.9    |
| C21 | C19 | C20 | 107.7(2) |  |     |     |     |          |

## Chiral HPLC of I:

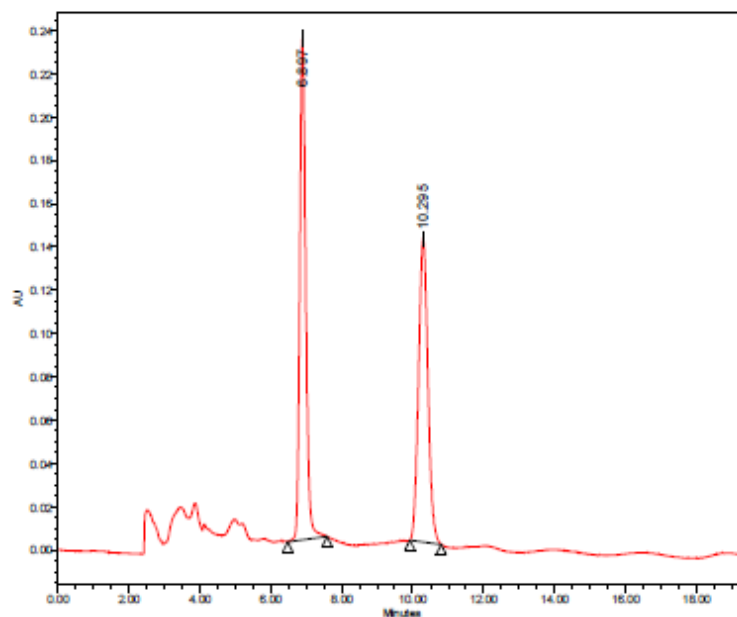

| Retention Time (min) | Area    | % Area | Height |
|----------------------|---------|--------|--------|
| 6.897                | 2718185 | 51.27  | 231446 |
| 10.295               | 2583967 | 48.73  | 139738 |

Figure S18. Chiral HPLC of macrocycle; indicating the presence of racemic mixture (achiral)

## <sup>1</sup>H NMR:

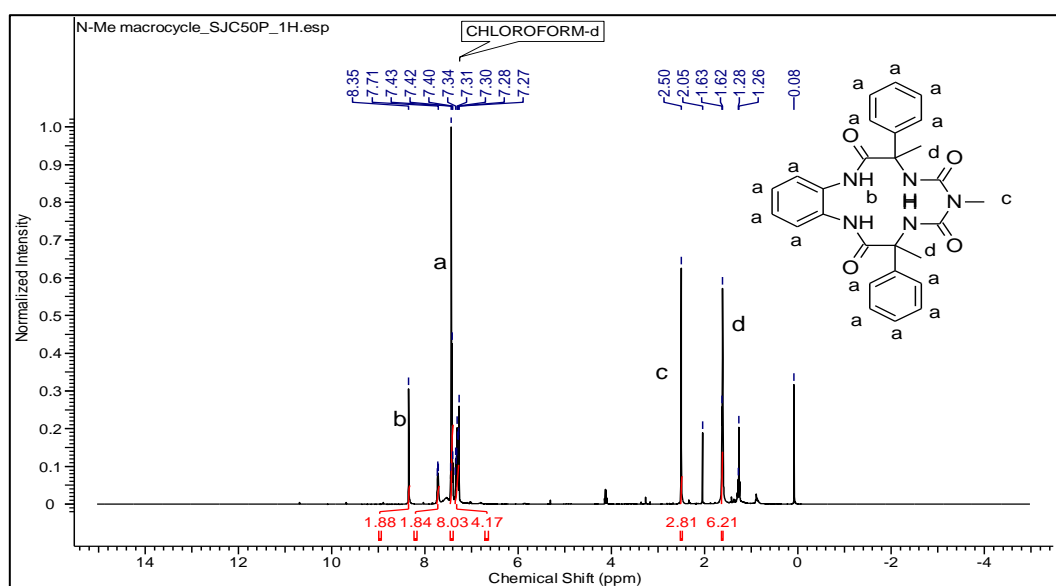

Figure S19. <sup>1</sup>H NMR of I

### <sup>13</sup>C NMR:

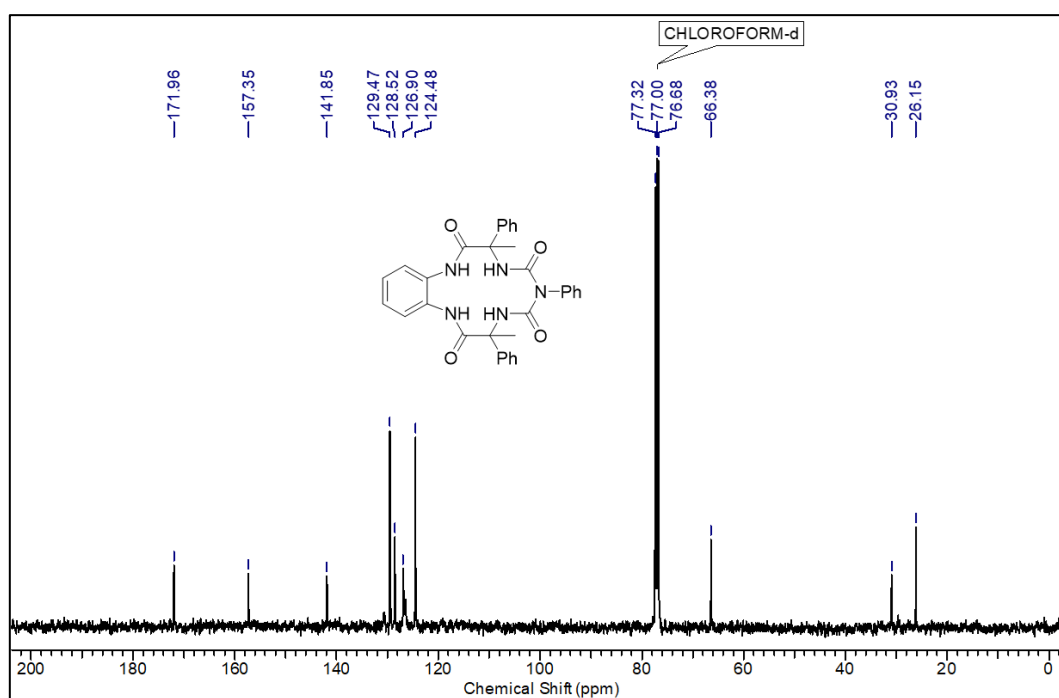

Figure S20. <sup>13</sup>C NMR of I

### HRMS:

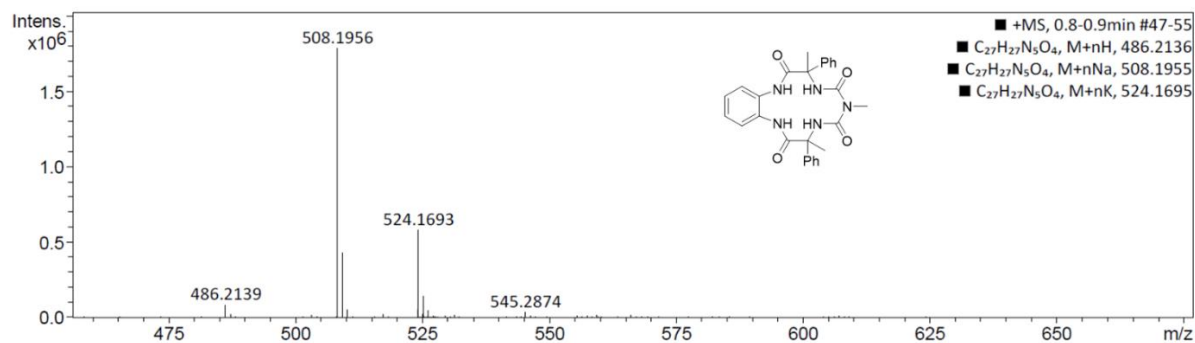

Figure S21. HRMS of I

### Fe<sup>III</sup>(Ph,Me-bTAML)Cl (J, complex 2)

NMR inactive (paramagnetic)

HRMS: 537.1182 (m/z) [calc'd 537.1099 (m/z)]

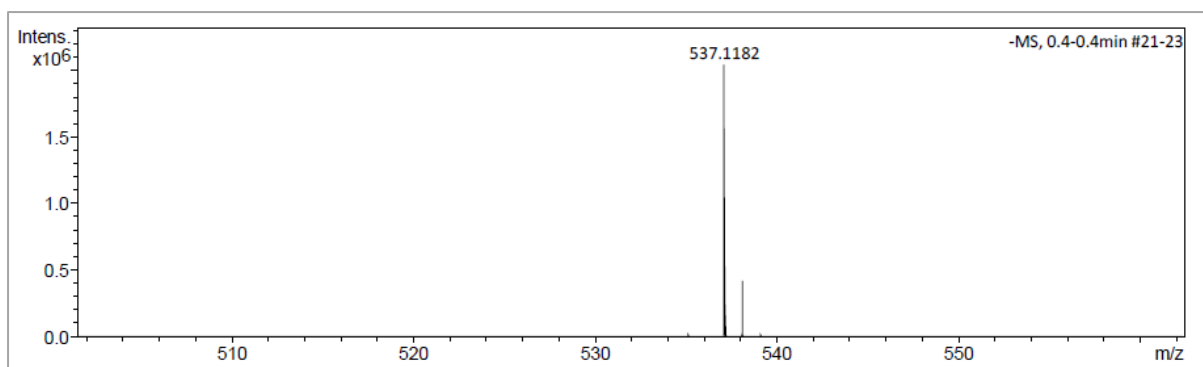

Figure S22. HRMS of complex **2**

### Single Crystal X-ray Diffraction (SCXRD):

CCDC number: 2132158

The X-ray crystal structure of **2** indicates a square-pyramidal Fe(III) with an axial Cl atom (Fig. S1), resulting from an orthorhombic crystal system (space group, *Pbca* (no. 61)). All the four Fe–N bond lengths are around 1.884 Å and the Fe(III) lies 0.45 Å above the plane formed by the four donor nitrogens (N2, N3, N4, N5). The N1 atom of the Me-biuret ring is 3.141 Å away from the Fe(III) indicating that this N-atom is not involved in bonding with the Fe(III) center. The Me-biuret ring is close to planarity and the torsion angle between the C1–N1 and C2–N2 planes is around 174°. Therefore, the N5 atom in the six-membered ring is strictly  $sp^2$  hybridized and the nitrogen lone pair, residing in the p orbital of N1 atom, is conjugated extensively to the carbonyl C-atom on both sides.

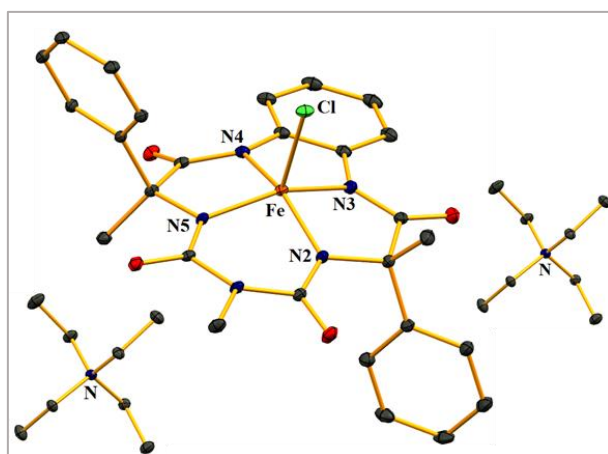

Figure S23. ORTEP diagram of  $[\text{Fe}^{\text{III}}(\text{Ph,Me-bTAML})\text{Cl}](\text{Et}_4\text{N})_2$  (**2**) with 50% probability

Table S2a. Some important bond lengths and bond angles of the crystal structure of **2**

| Bond length (Å) |           | Bond angles (°) |          |          |           |
|-----------------|-----------|-----------------|----------|----------|-----------|
| Fe–N2           | 1.8793(9) | N2–Fe–N3        | 84.36(4) | N3–Fe–N5 | 151.64(4) |
| Fe–N3           | 1.8810(9) | N2–Fe–N5        | 94.90(4) | N2–Fe–Cl | 100.21(3) |



|       |           |          |           |          |           |
|-------|-----------|----------|-----------|----------|-----------|
| Fe–N4 | 1.8915(9) | N3–Fe–N4 | 83.24(4)  | N3–Fe–Cl | 101.03(3) |
| Fe–N5 | 1.8850(9) | N4–Fe–N5 | 84.59(4)  | N4–Fe–Cl | 106.54(3) |
| Fe–Cl | 2.3606(3) | N4–Fe–N2 | 152.20(4) | N5–Fe–Cl | 106.97(3) |

Table S2b. Data collection and structure refinement parameters of **2**:

|                                                                                                                     |                                                                                                          |
|---------------------------------------------------------------------------------------------------------------------|----------------------------------------------------------------------------------------------------------|
| Identification number                                                                                               | 2132158                                                                                                  |
| Formula                                                                                                             | C <sub>43</sub> H <sub>63</sub> ClFeN <sub>7</sub> O <sub>4</sub>                                        |
| Formula weight                                                                                                      | 833.30                                                                                                   |
| Crystal colour, habit                                                                                               | Orange-red                                                                                               |
| <i>T</i> / K                                                                                                        | 100(2)                                                                                                   |
| Crystal system                                                                                                      | Orthorhombic                                                                                             |
| Space group                                                                                                         | <i>Pbca</i> (no. 61)                                                                                     |
| <i>a</i> /Å                                                                                                         | 13.9731(5)                                                                                               |
| <i>b</i> /Å                                                                                                         | 16.3251(5)                                                                                               |
| <i>c</i> /Å                                                                                                         | 37.9097(13)                                                                                              |
| $\alpha$ /°                                                                                                         | 90                                                                                                       |
| $\beta$ /°                                                                                                          | 90                                                                                                       |
| $\gamma$ /°                                                                                                         | 90                                                                                                       |
| <i>V</i> /Å <sup>3</sup>                                                                                            | 8647.7(5)                                                                                                |
| <i>Z</i>                                                                                                            | 8                                                                                                        |
| <i>D<sub>c</sub></i> /g cm <sup>-3</sup>                                                                            | 1.280                                                                                                    |
| $\mu$ /mm <sup>-1</sup>                                                                                             | 0.460                                                                                                    |
| Reflections measured                                                                                                | 160929                                                                                                   |
| Unique reflections/ <i>R</i> <sub>int</sub>                                                                         | 13215 / <i>R</i> <sub>int</sub> = 0.0526,                                                                |
| Reflections used [ <i>I</i> > 2σ( <i>I</i> )]                                                                       | 12290                                                                                                    |
| <i>R</i> <sub>1</sub> <sup><i>a</i></sup> , <i>wR</i> <sub>2</sub> <sup><i>b</i></sup> [ <i>I</i> > 2σ( <i>I</i> )] | <i>R</i> <sub>1</sub> = 0.0355 <sup><i>a</i></sup> , <i>wR</i> <sub>2</sub> = 0.0911 <sup><i>b</i></sup> |
| <i>R</i> <sub>1</sub> <sup><i>a</i></sup> , <i>wR</i> <sub>2</sub> <sup><i>b</i></sup> (all data)                   | <i>R</i> <sub>1</sub> = 0.0389 <sup><i>a</i></sup> , <i>wR</i> <sub>2</sub> = 0.0929 <sup><i>b</i></sup> |
| GOF on <i>F</i> <sup>2</sup>                                                                                        | 1.082                                                                                                    |

$${}^aR_1 = \Sigma||F_o| - |F_c||/\Sigma|F_o|, {}^b wR_2 = \{\Sigma[w(|F_o|^2 - |F_c|^2)^2]/\Sigma[w(|F_o|^2)^2]\}^{1/2}.$$

Table S2c. All bond lengths for crystal structure of **2**

| Atom | Atom | Length/Å   | Atom | Atom | Length/Å   |
|------|------|------------|------|------|------------|
| Fe1  | C11  | 2.3606(3)  | C26  | C25  | 1.3951(15) |
| Fe1  | N5   | 1.8850(9)  | C24  | C23  | 1.3891(17) |
| Fe1  | N3   | 1.8810(9)  | C24  | C25  | 1.3920(16) |
| Fe1  | N4   | 1.8915(9)  | C38  | C39  | 1.5158(17) |
| Fe1  | N2   | 1.8793(9)  | C21  | C19  | 1.5388(14) |
| O3   | C18  | 1.2345(13) | C21  | C22  | 1.4024(14) |
| O4   | C27  | 1.2404(13) | C23  | C22  | 1.3964(15) |
| O2   | C11  | 1.2299(14) | C19  | C18  | 1.5591(15) |
| O1   | C2   | 1.2402(13) | C19  | C20  | 1.5377(15) |
| N6   | C30  | 1.5195(14) | C12  | C17  | 1.4166(16) |

|     |     |            |  |     |     |            |
|-----|-----|------------|--|-----|-----|------------|
| N6  | C28 | 1.5205(14) |  | C12 | C13 | 1.3964(15) |
| N6  | C32 | 1.5219(14) |  | C30 | C31 | 1.5149(18) |
| N6  | C34 | 1.5219(14) |  | C40 | C41 | 1.5149(17) |
| N5  | C27 | 1.3460(13) |  | C28 | C29 | 1.5128(16) |
| N5  | C19 | 1.4819(13) |  | C32 | C33 | 1.5095(17) |
| N7  | C42 | 1.5188(14) |  | C16 | C17 | 1.3968(15) |
| N7  | C38 | 1.5287(15) |  | C16 | C15 | 1.4004(17) |
| N7  | C40 | 1.5192(15) |  | C14 | C13 | 1.4005(18) |
| N7  | C36 | 1.5159(15) |  | C14 | C15 | 1.380(2)   |
| N1  | C27 | 1.4243(13) |  | C34 | C35 | 1.5080(16) |
| N1  | C1  | 1.4675(14) |  | C6  | C5  | 1.3971(15) |
| N1  | C2  | 1.4267(14) |  | C6  | C7  | 1.3994(17) |
| N3  | C12 | 1.4085(14) |  | C11 | C3  | 1.5613(16) |
| N3  | C11 | 1.3495(14) |  | C3  | C5  | 1.5303(15) |
| N4  | C18 | 1.3525(14) |  | C3  | C4  | 1.5339(16) |
| N4  | C17 | 1.4147(13) |  | C5  | C10 | 1.3929(16) |
| N2  | C2  | 1.3419(14) |  | C7  | C8  | 1.381(2)   |
| N2  | C3  | 1.4851(14) |  | C8  | C9  | 1.386(2)   |
| C42 | C43 | 1.5212(16) |  | C10 | C9  | 1.3922(16) |
| C26 | C21 | 1.3945(15) |  | C36 | C37 | 1.5227(19) |

Table S2d. All bond angles for crystal structure of **2**

| Atom | Atom | Atom | Angle/°   | Atom | Atom | Atom | Angle/°    |
|------|------|------|-----------|------|------|------|------------|
| N5   | Fe1  | C11  | 106.97(3) | N5   | C19  | C21  | 113.03(8)  |
| N5   | Fe1  | N4   | 84.59(4)  | N5   | C19  | C18  | 106.13(8)  |
| N3   | Fe1  | C11  | 101.03(3) | N5   | C19  | C20  | 113.01(8)  |
| N3   | Fe1  | N5   | 151.64(4) | C21  | C19  | C18  | 106.14(8)  |
| N3   | Fe1  | N4   | 83.24(4)  | C20  | C19  | C21  | 111.03(8)  |
| N4   | Fe1  | C11  | 106.54(3) | C20  | C19  | C18  | 106.94(9)  |
| N2   | Fe1  | C11  | 100.21(3) | N3   | C12  | C17  | 112.55(9)  |
| N2   | Fe1  | N5   | 94.90(4)  | C13  | C12  | N3   | 127.47(11) |
| N2   | Fe1  | N3   | 84.36(4)  | C13  | C12  | C17  | 119.96(11) |
| N2   | Fe1  | N4   | 152.20(4) | C24  | C25  | C26  | 120.56(11) |
| C30  | N6   | C28  | 111.96(9) | C31  | C30  | N6   | 115.48(10) |
| C30  | N6   | C32  | 112.15(9) | C41  | C40  | N7   | 114.79(9)  |
| C30  | N6   | C34  | 104.73(8) | C29  | C28  | N6   | 114.84(9)  |
| C28  | N6   | C32  | 105.19(8) | O1   | C2   | N1   | 117.37(10) |
| C28  | N6   | C34  | 111.76(8) | O1   | C2   | N2   | 124.60(10) |
| C34  | N6   | C32  | 111.22(9) | N2   | C2   | N1   | 118.04(9)  |
| C27  | N5   | Fe1  | 125.34(7) | O3   | C18  | N4   | 126.56(10) |
| C27  | N5   | C19  | 118.68(9) | O3   | C18  | C19  | 121.10(10) |
| C19  | N5   | Fe1  | 115.38(6) | N4   | C18  | C19  | 112.33(9)  |
| C42  | N7   | C38  | 107.40(9) | C33  | C32  | N6   | 115.11(10) |
| C42  | N7   | C40  | 108.90(8) | C17  | C16  | C15  | 119.18(12) |
| C40  | N7   | C38  | 111.28(9) | C15  | C14  | C13  | 121.29(11) |
| C36  | N7   | C42  | 111.39(9) | N4   | C17  | C12  | 112.78(9)  |
| C36  | N7   | C38  | 108.81(9) | C16  | C17  | N4   | 126.99(11) |

|     |     |     |            |  |     |     |     |            |
|-----|-----|-----|------------|--|-----|-----|-----|------------|
| C36 | N7  | C40 | 109.06(9)  |  | C16 | C17 | C12 | 120.23(10) |
| C27 | N1  | C1  | 113.97(9)  |  | C35 | C34 | N6  | 115.43(9)  |
| C27 | N1  | C2  | 130.61(9)  |  | C12 | C13 | C14 | 118.90(12) |
| C2  | N1  | C1  | 114.87(9)  |  | C5  | C6  | C7  | 120.55(12) |
| C12 | N3  | Fe1 | 115.34(7)  |  | O2  | C11 | N3  | 127.04(11) |
| C11 | N3  | Fe1 | 117.82(8)  |  | O2  | C11 | C3  | 120.60(10) |
| C11 | N3  | C12 | 126.83(10) |  | N3  | C11 | C3  | 112.36(9)  |
| C18 | N4  | Fe1 | 117.30(7)  |  | C14 | C15 | C16 | 120.43(11) |
| C18 | N4  | C17 | 124.22(9)  |  | N2  | C3  | C11 | 107.38(9)  |
| C17 | N4  | Fe1 | 114.83(7)  |  | N2  | C3  | C5  | 113.01(9)  |
| C2  | N2  | Fe1 | 126.39(7)  |  | N2  | C3  | C4  | 110.61(9)  |
| C2  | N2  | C3  | 118.10(9)  |  | C5  | C3  | C11 | 104.16(9)  |
| C3  | N2  | Fe1 | 114.86(7)  |  | C5  | C3  | C4  | 113.67(9)  |
| O4  | C27 | N5  | 124.98(10) |  | C4  | C3  | C11 | 107.46(9)  |
| O4  | C27 | N1  | 117.02(9)  |  | C23 | C22 | C21 | 120.76(10) |
| N5  | C27 | N1  | 118.00(9)  |  | C6  | C5  | C3  | 121.97(10) |
| N7  | C42 | C43 | 114.13(9)  |  | C10 | C5  | C6  | 118.33(11) |
| C21 | C26 | C25 | 120.75(10) |  | C10 | C5  | C3  | 119.37(10) |
| C23 | C24 | C25 | 119.18(10) |  | C8  | C7  | C6  | 120.21(12) |
| C39 | C38 | N7  | 114.99(10) |  | C7  | C8  | C9  | 119.81(11) |
| C26 | C21 | C19 | 121.94(9)  |  | C9  | C10 | C5  | 121.05(12) |
| C26 | C21 | C22 | 118.32(9)  |  | N7  | C36 | C37 | 114.45(10) |
| C22 | C21 | C19 | 119.71(9)  |  | C8  | C9  | C10 | 120.03(12) |
| C24 | C23 | C22 | 120.37(10) |  |     |     |     |            |

### EPR Spectroscopy:

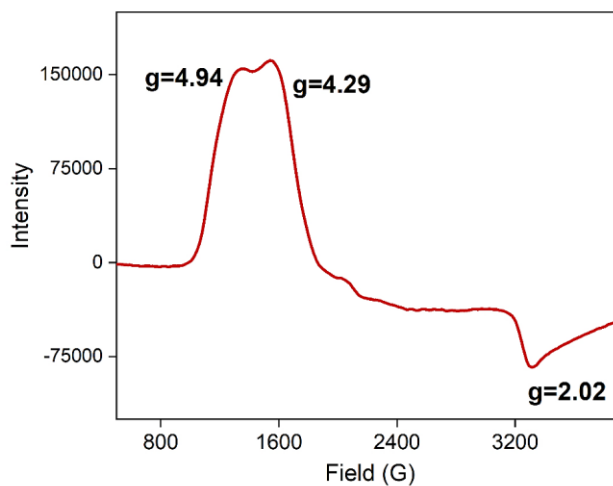

Figure S24. EPR of **2** in acetonitrile (7.5 mM) at 100 K.

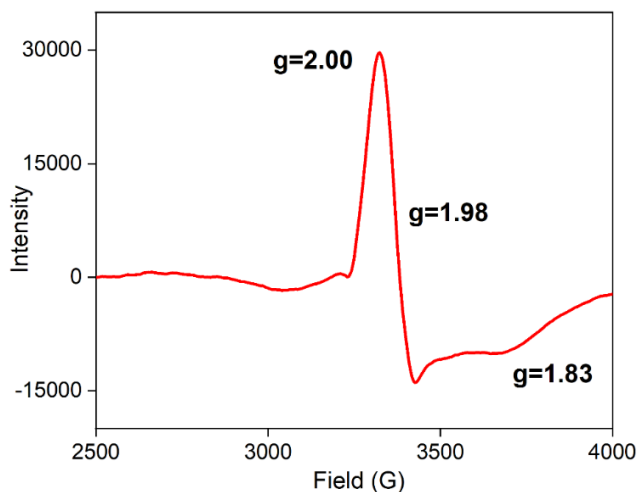

Figure S25. EPR of **3** in acetonitrile (3 mM) at 100 K; the g-values indicate the formation of  $S = \frac{1}{2}$  species [i.e.,  $\text{Fe}^{\text{V}}(\text{O})$ ]

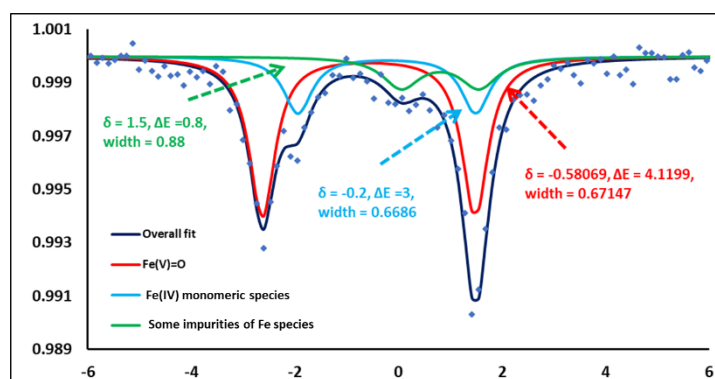

Figure S26. Mössbauer spectrum of **3** (2 mM) at 77K [61%  $\text{Fe}^{\text{V}}(\text{O})$  with 23% Fe(IV) and 16% some impurities of Fe species].

### Electrochemistry:

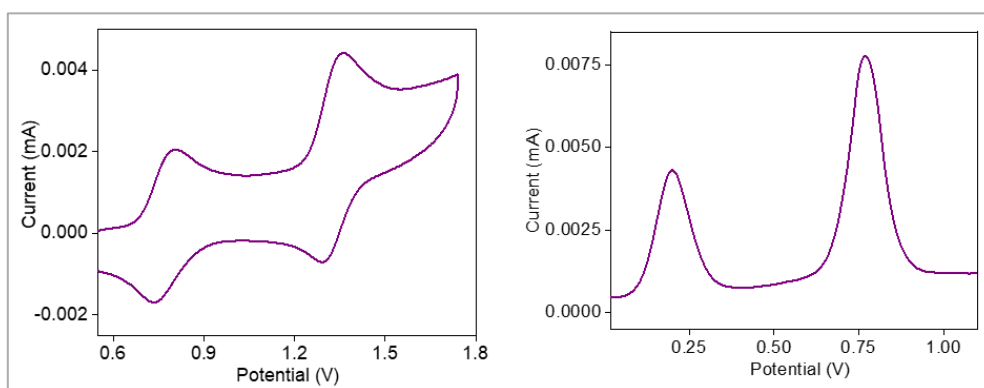

Figure S27. CV and DPV of **2** in acetonitrile solvent (0.1 mM); reduction potential values are plotted with respect to NHE

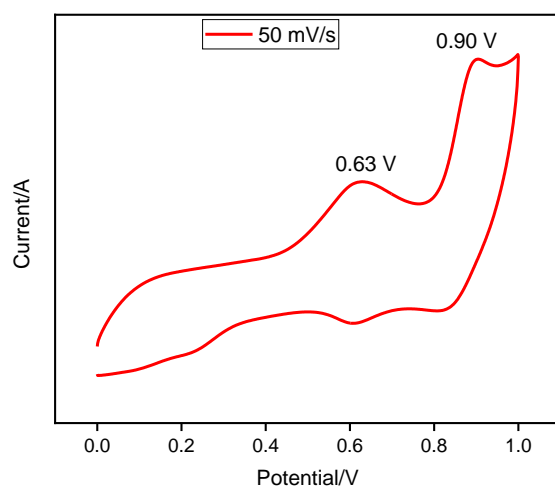

Figure S28. CV **2** in 100% water solvent (0.1 mM); reduction potential values are plotted with respect to Ag/AgCl (3M KCl) electrode.

### 3C. Reactivity Studies

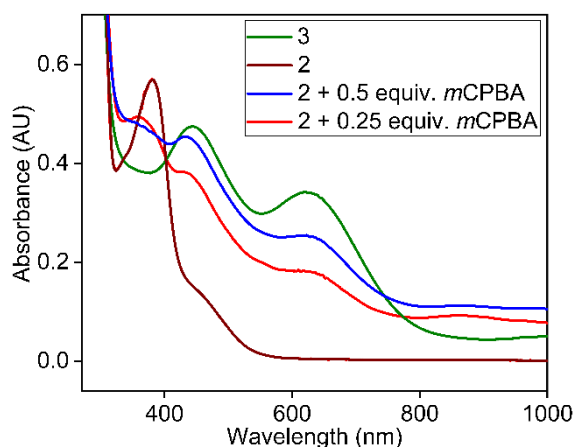

Figure S29. **Red spectrum:** Addition of 0.25 equiv *m*CPBA to **2** in MeCN ( $\lambda_{\max}$ : 434 nm and 625 nm); **Blue spectrum:** Addition of 0.5 equiv *m*CPBA to **2** in MeCN ( $\lambda_{\max}$ : 434 nm and 625 nm); Formation of a new species; Same spectrum was obtained when comproportionation reaction was performed between equimolar amounts of **2** and **3**.

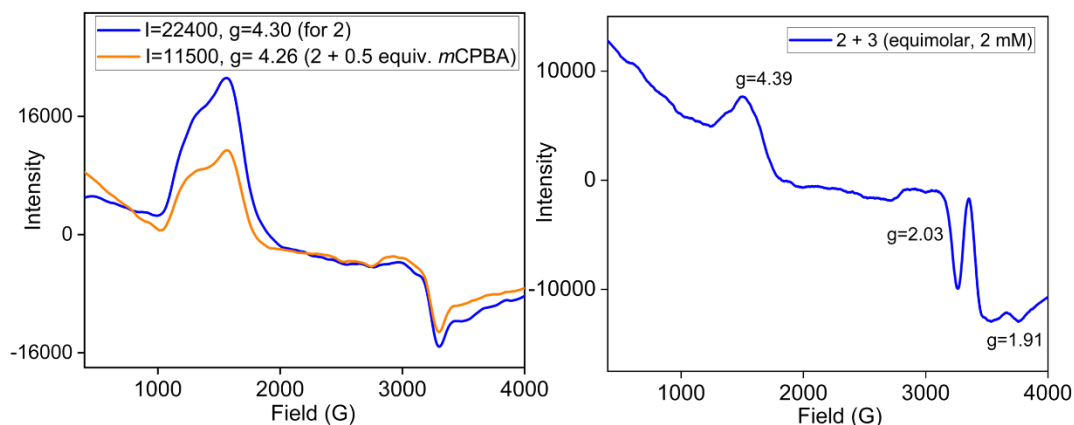

Figure S30. Left: EPR of **2** and taken with 0.5 equiv *m*CPBA; Right: EPR of equimolar mixture of **2** and **3**

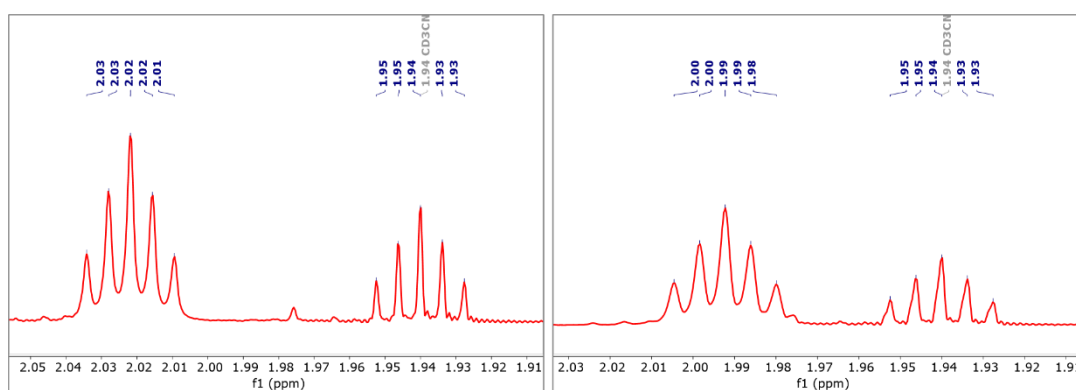

Figure S31. **Left:** Paramagnetic NMR: **2** in  $\text{CD}_3\text{CN}$  (2.4 mM); no. of unpaired electrons: 3 ( $\mu = 3.9$ ), (expt) = 4.3; **Right:** Paramagnetic NMR: **2** + 0.5 equiv NaOCl (2.4 mM): (expt) = 3.4, no. of unpaired electrons  $\approx 2.5$ , indicates a decrease in Fe(III) concentration

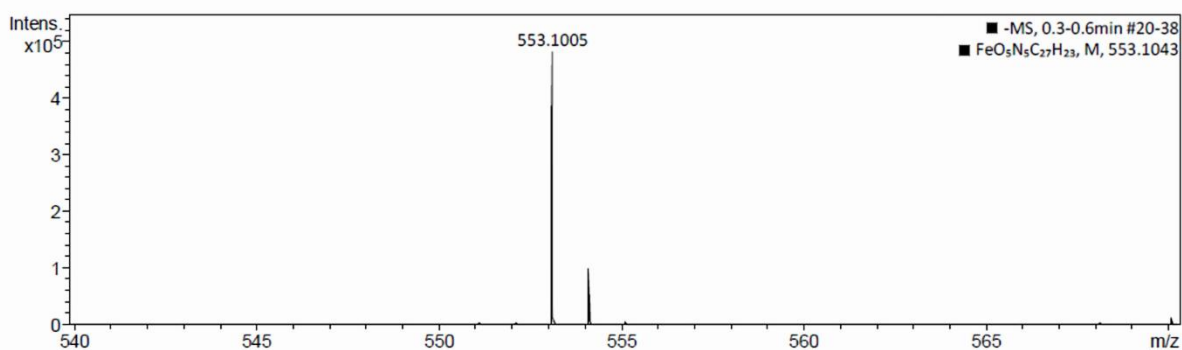

Figure S32. HRMS of **3** formed upon addition of *m*CPBA to **2** in  $\text{CH}_3\text{CN}$ ; Experimental  $m/z$  ( $M^-$ ) 553.1005 (100%); calc'd  $m/z$  ( $M^-$ ) 553.1049 (100%).

### 3D. Kinetics Studies

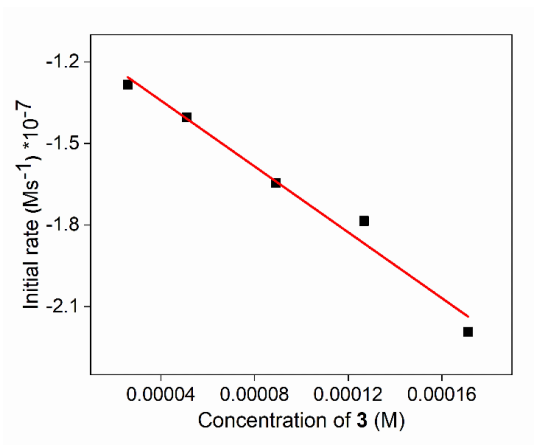

Figure S33. Self decay of **3** (prepared from mCPBA) in CH<sub>3</sub>CN solvent at 298 K ( $k_{\text{decay}} 6.0531 \times 10^{-4} \text{ s}^{-1}$ ).

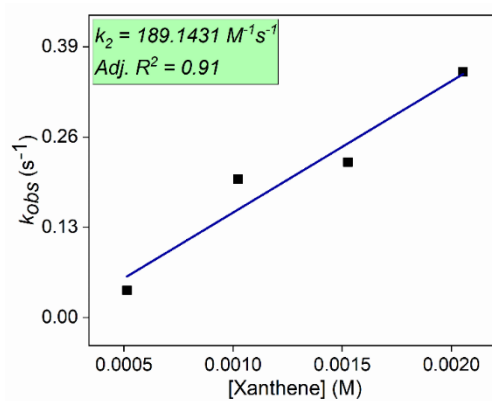

Figure S34. Plot of  $k_{\text{obs}}$  vs concentration of xanthene ( $k_2 = 189.1431 \pm 33.975 \text{ M}^{-1}\text{s}^{-1}$ ).

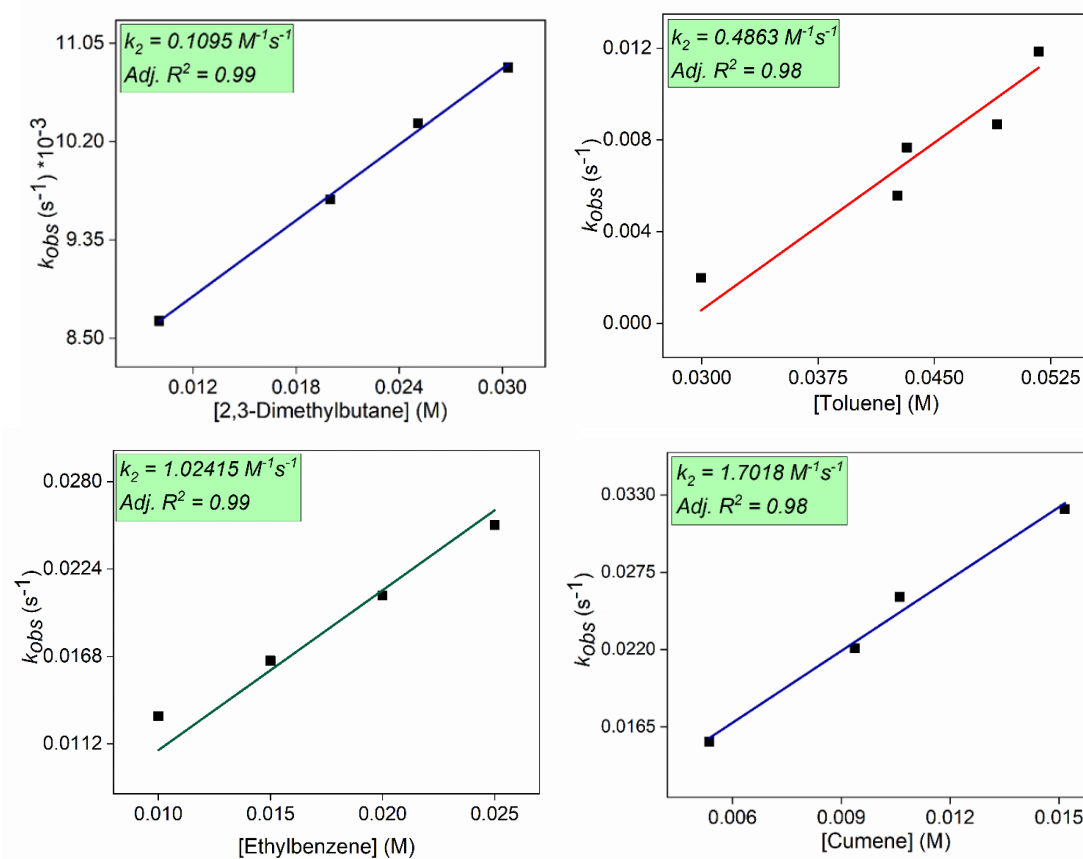

Figure S35. Plot of  $k_{obs}$  vs concentration of 2,3-dimethylbutane ( $k_2 = 0.1095 \pm 0.004 \text{ M}^{-1}\text{s}^{-1}$ ), toluene ( $k_2 = 0.4863 \pm 0.012 \text{ M}^{-1}\text{s}^{-1}$ ), ethylbenzene ( $k_2 = 1.0242 \pm 0.039 \text{ M}^{-1}\text{s}^{-1}$ ), cumene ( $k_2 = 1.7018 \pm 0.130 \text{ M}^{-1}\text{s}^{-1}$ ).

Table S3. Second order rate constants ( $k_2$ ) for oxidation of model sp<sup>3</sup> C–H bond-containing substrates in CH<sub>3</sub>CN; comparison of **3** with **1A'**.

| Substrates         | BDE(C-H)<br>(kcal/mol) | $k_2$ (M <sup>-1</sup> s <sup>-1</sup> ) with<br>Fe( <i>PhMeb</i> TAML)-Cl<br>complex | $k_2$ (M <sup>-1</sup> s <sup>-1</sup> ) with<br>Fe( <i>b</i> TAML)-Cl<br>complex |
|--------------------|------------------------|---------------------------------------------------------------------------------------|-----------------------------------------------------------------------------------|
| Xanthene           | 75.5                   | 189.1431 ± 33.975                                                                     | -                                                                                 |
| Cumene             | 84.5                   | 1.7018 ± 0.130                                                                        | 0.791 ± 0.090                                                                     |
| Ethylbenzene       | 87                     | 1.0242 ± 0.039                                                                        | 0.284 ± 0.021                                                                     |
| Toluene            | 90                     | 0.4863 ± 0.012                                                                        | 0.136 ± 0.016                                                                     |
| 2,3-Dimethylbutane | 96.5                   | 0.1095 ± 0.004                                                                        | 0.0350 ± 0.010                                                                    |



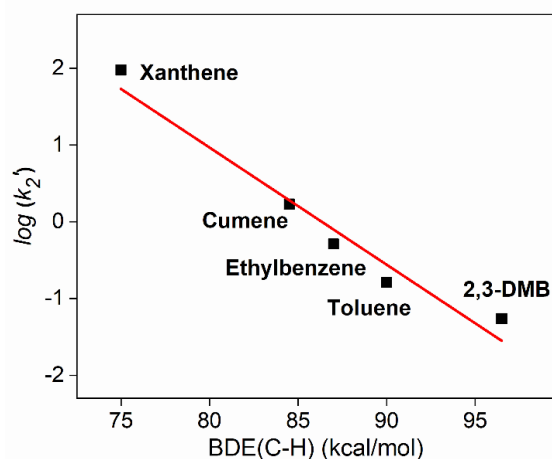

Figure S36. BEP curve for **3** (by *m*CPBA) catalyzed C–H bond oxidation at single turnover conditions in CH<sub>3</sub>CN. A linear plot (slope  $0.1525 \pm 0.0170 \text{ M}^{-1}\text{s}^{-1}$ ) was observed.

### 3E. Oxoiron(V) intermediate formation by *m*CPBA treatment in 100% water and its kinetic study

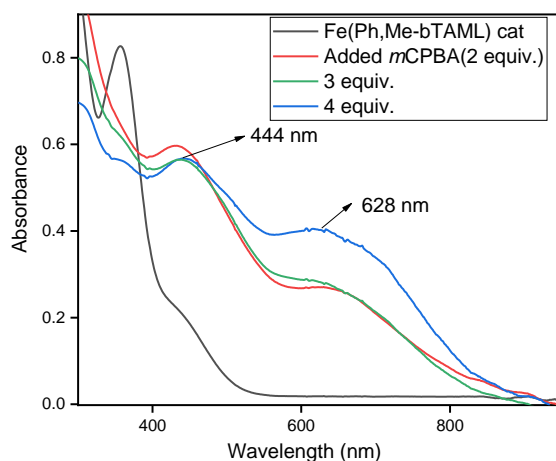

Figure S37. Qualitative formation of Fe<sup>V</sup>(O) from complex **2** with the addition of *m*CPBA of different equivalents.

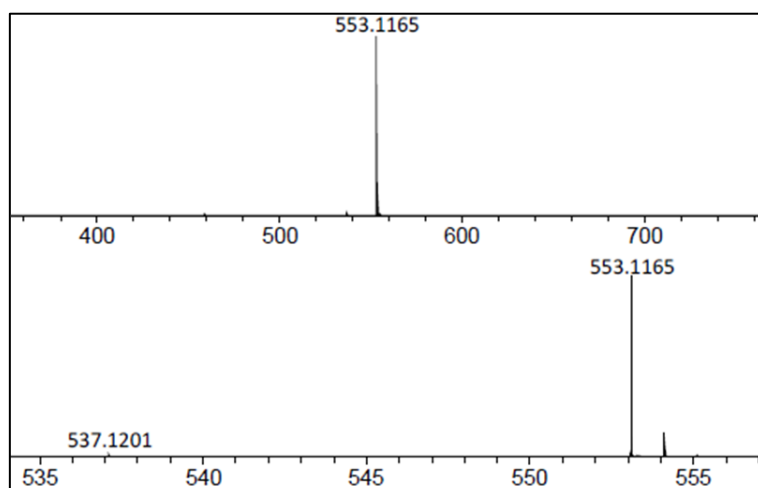

Figure S38. HRMS data of **3** formed by *m*CPBA in 100% water; Experimental  $m/z$  ( $M^-$ ) 553.1165 (100%); calc'd  $m/z$  ( $M^-$ ) 553.1049.

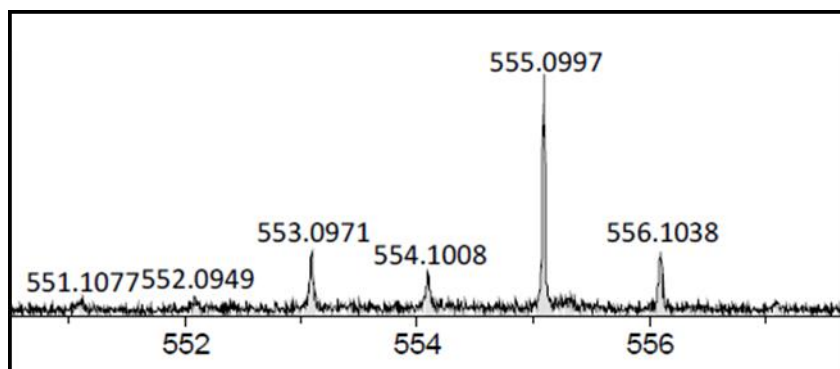

Figure S39. HRMS of **3** (with *m*CPBA) in 100% water in presence of  $H_2O^{18}$ . Calculated  $m/z$  of **2** after  $O^{18}$  incorporation = 555.0997.

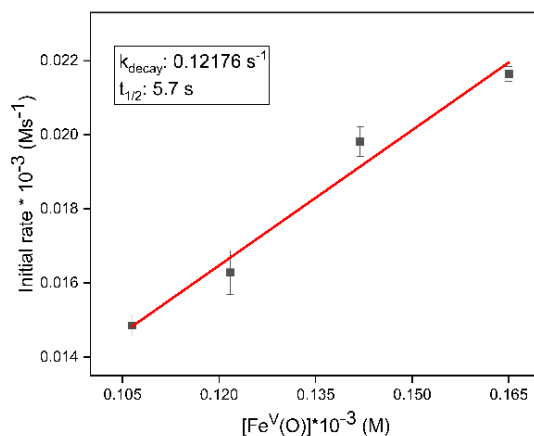

Figure S40. Self decay of complex **3** (prepared from *m*CPBA) in 100% water at 298 K ( $k_{decay}$  0.12176 s<sup>-1</sup>)

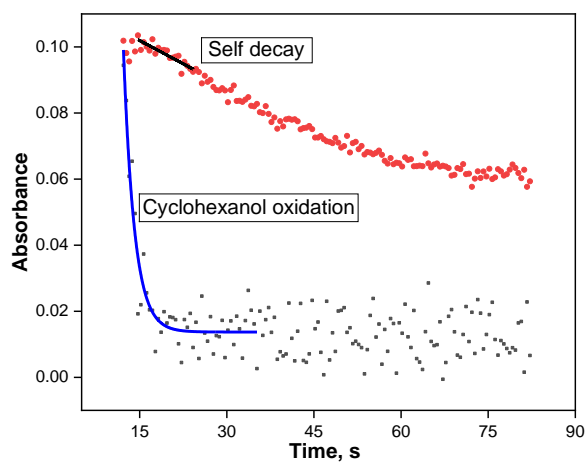

Figure S41. Comparison rate data of self decay and cyclohexanol oxidation of complex **3** in 100% water at 298 K.

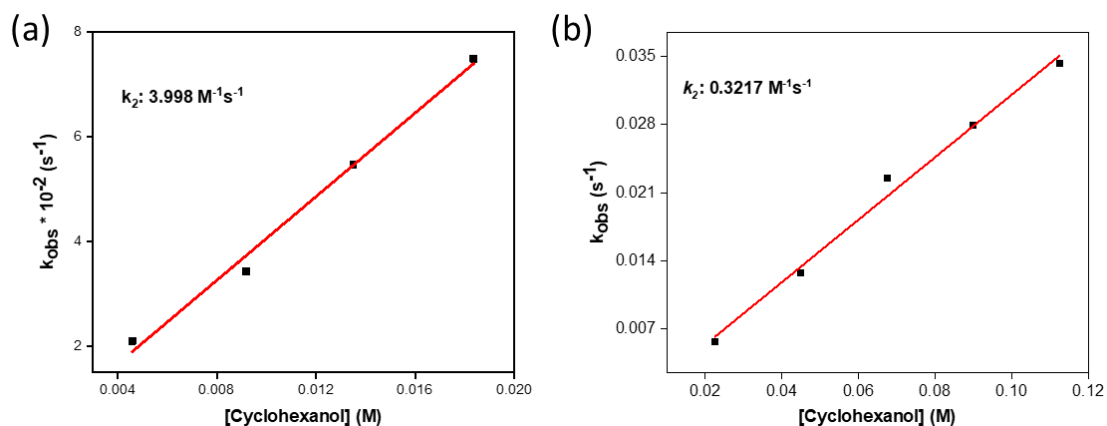

Figure S42. Determination of second order rate constant values of complex **3** for cyclohexanol oxidation in (a) 80% CH<sub>3</sub>CN-H<sub>2</sub>O and (b) 97% CH<sub>3</sub>CN-H<sub>2</sub>O medium with *m*CPBA.

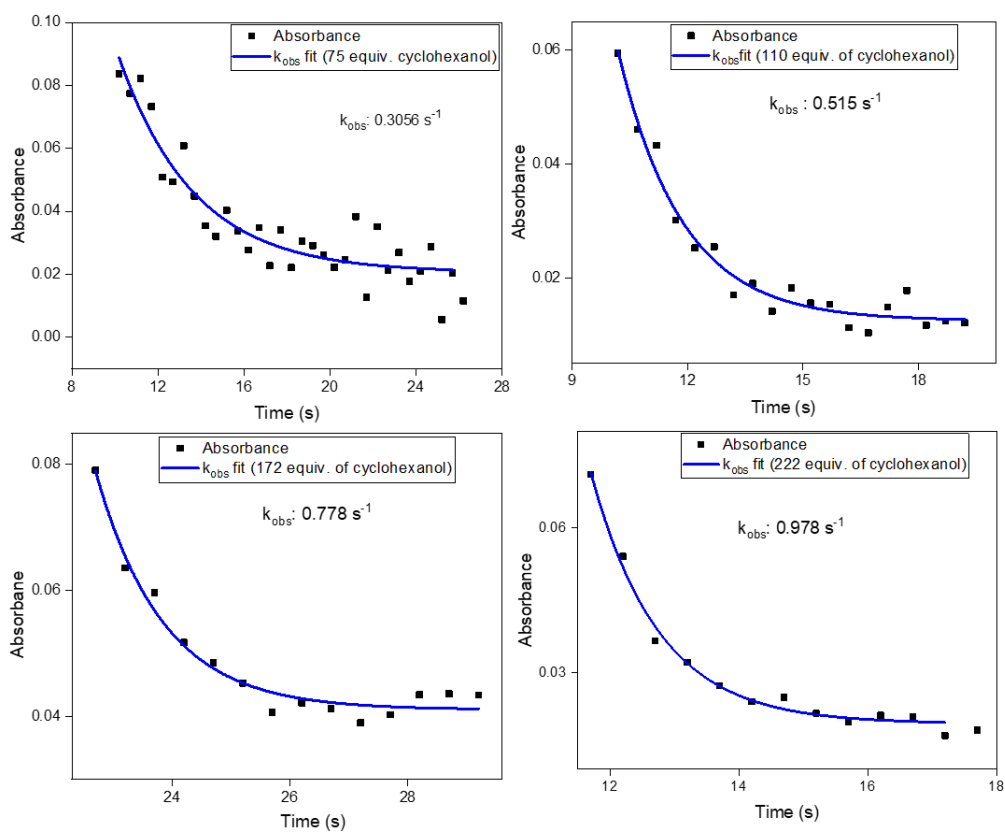

Figure S43. Kinetic traces for the reaction of complex **3** (0.045 mM) in 100% water by *m*CPBA with cyclohexanol at various concentrations at 10°C. The kinetic traces were fitted to the equation,  $[A_t = A_a - (A_a - A_0)e^{-k_{obs}t}]$  for obtaining  $k_{obs}$  values.

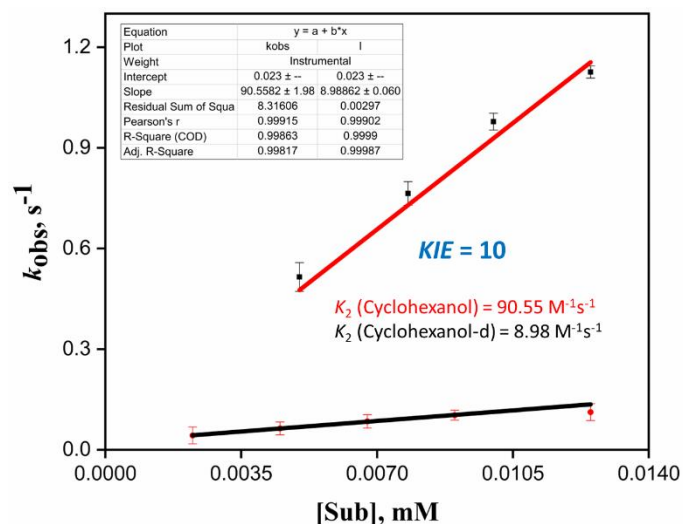

Figure S44. Plot of  $k_{\text{obs}} / \text{s}^{-1}$  vs [cyclohexanol] ( $k_2$ :  $90.55 \text{ M}^{-1}\text{s}^{-1}$ ) (red line) and [cyclohexanol- $d$ ] ( $k_2$ :  $8.98 \text{ M}^{-1}\text{s}^{-1}$ ) (black line) by **3** formed by *m*CPBA in water medium showing significant kinetic isotope effect at  $10^\circ\text{C}$ .

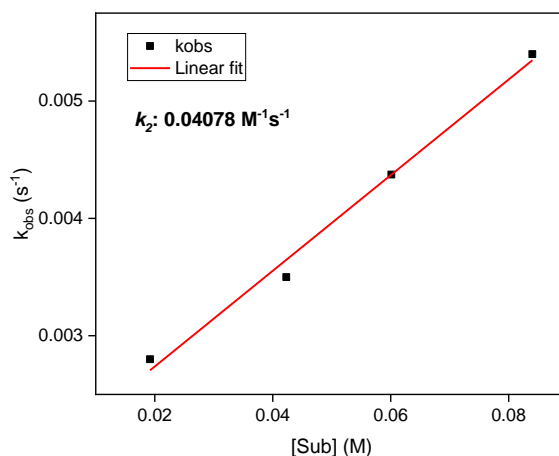

Figure S45. Determination of second order rate constant values of complex **3** for 6-methylheptan-2-yl isonicotinate oxidation in 97%  $\text{CH}_3\text{CN}-\text{H}_2\text{O}$  medium with *m*CPBA.

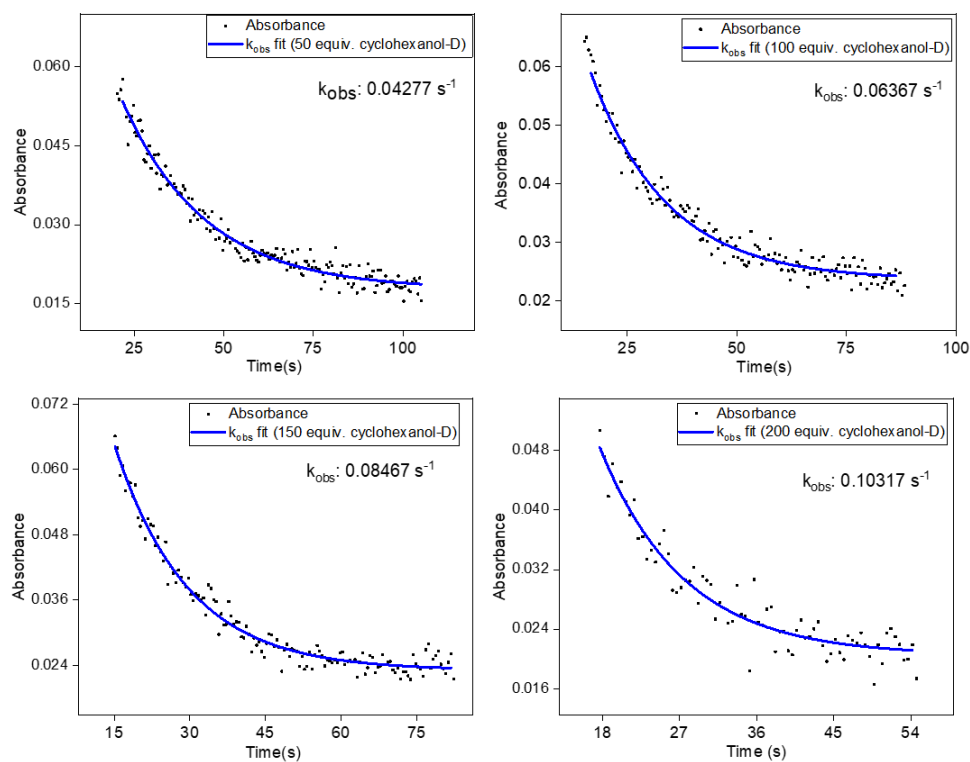

Figure S46. Kinetic traces for the reaction of complex **3** (0.045 mM) in 100% water by *m*CPBA with cyclohexanol-*d* at various concentrations. The kinetic traces were fitted to the equation,  $[A_t = A_\alpha - (A_\alpha - A_o)e^{-k_{obs}t}]$  for obtaining  $k_{obs}$  values.

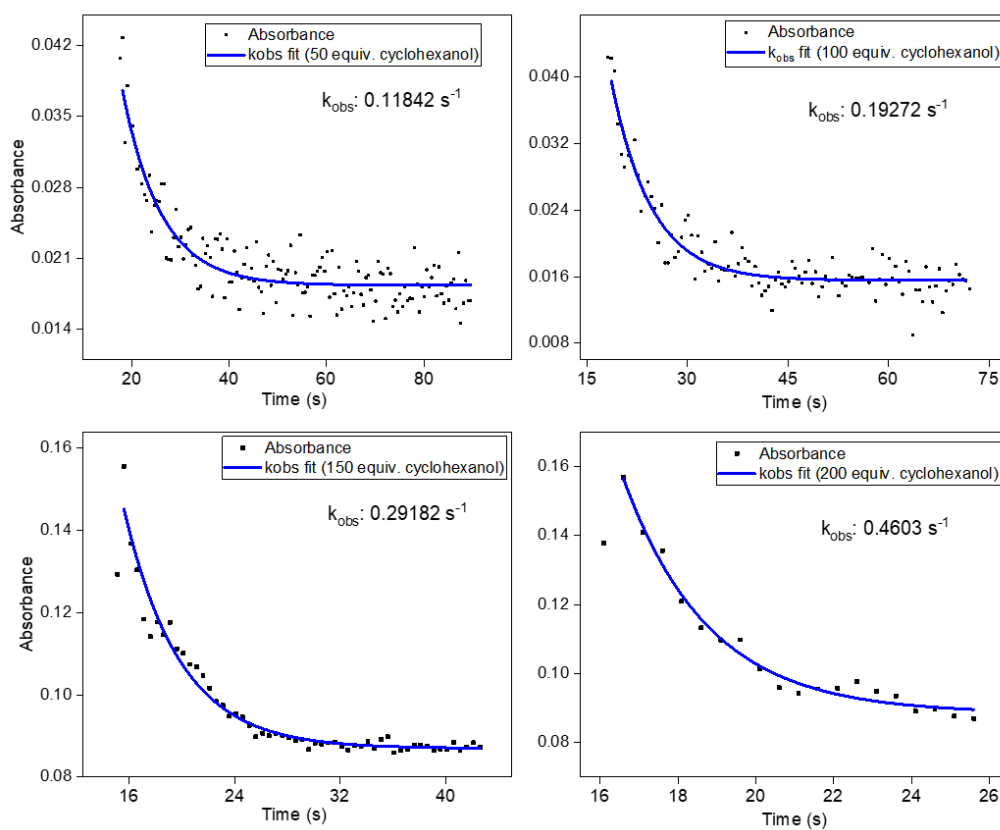

Figure S47. Kinetic traces for the reaction of complex **3** (0.045 mM) in 100% D<sub>2</sub>O by *m*CPBA with cyclohexanol at various concentrations using the buffered solution to maintain pH.

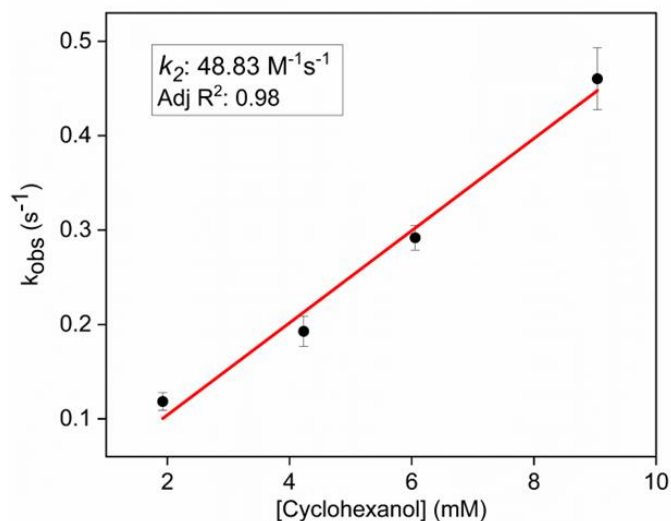

Figure S48. Determination of second order rate constant value of complex **3** for cyclohexanol oxidation in 100% D<sub>2</sub>O with *m*CPBA.

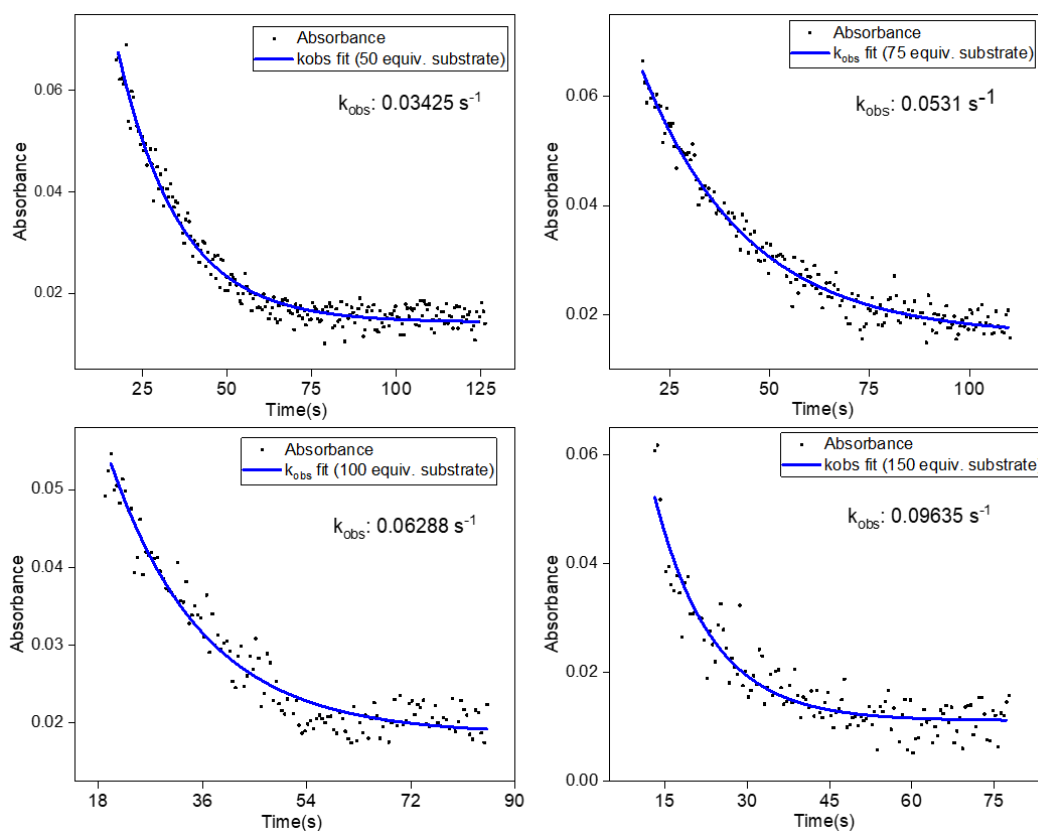

Figure S49. Kinetic traces for the reaction of complex **3** (0.045 mM) in 100% water by *m*CPBA with 6-methylheptan-2-yl isonicotinate at various concentrations. The kinetic traces were fitted to the equation,  $[(A_t = A_\alpha - (A_\alpha - A_0)e^{-k_{obs}t})]$  for obtaining  $k_{obs}$  values.

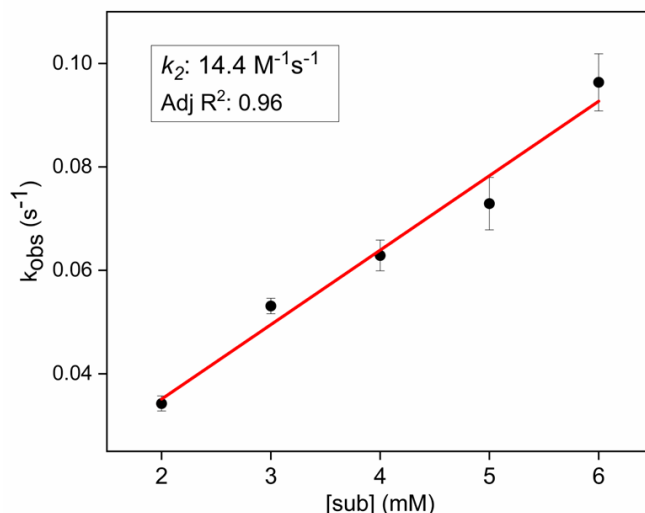

Figure S50. Determination of second order rate constant values of complex **3** for 6-methylheptan-2-yl isonicotinate oxidation in 100% H<sub>2</sub>O with *m*CPBA.

Table S4. Product yields for oxidation of different hydrocarbons by complex **3** in 100% water by treatment with *m*CPBA at single turnover condition (the yield is greater than the theoretical yield of 25% (4e<sup>-</sup> oxidation) and 50% (2e<sup>-</sup> oxidation) since a slight excess of *m*CPBA is present in the solution):

| C-H bond substrates | BDE <sub>C-H</sub> (kcal mol <sup>-1</sup> ) | Products                                                            | % GC yield |
|---------------------|----------------------------------------------|---------------------------------------------------------------------|------------|
| Cyclohexane         | 99.3                                         | C <sub>6</sub> H <sub>11</sub> OH; C <sub>6</sub> H <sub>10</sub> O | 32%        |
| Cyclohexanol        | 92.4                                         | C <sub>6</sub> H <sub>10</sub> O                                    | 75%        |
| Toluene             | 90                                           | PhCHO                                                               | 35%        |
| Ethyl benzene       | 87                                           | PhCH(OH)CH <sub>3</sub> ;<br>PhC(O)CH <sub>3</sub>                  | 62%        |
| Cumene              | 84.5                                         | PhC(OH)(CH <sub>3</sub> ) <sub>2</sub> ;                            | 71%        |

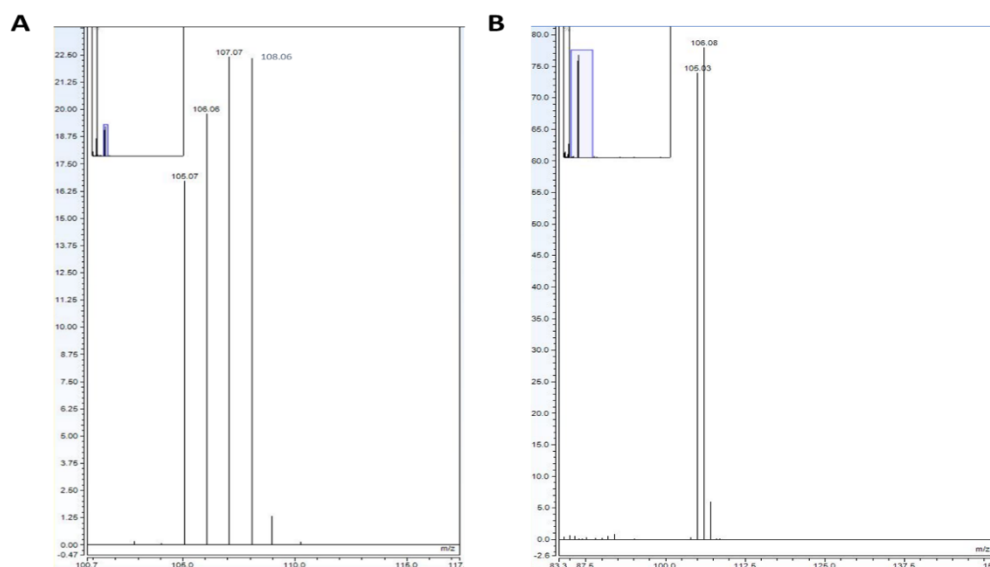

Figure S51. GC-MS data for the reaction of Complex **3** ( $2 \times 10^{-4}$  M) with toluene (0.1M) in presence of (A)  $\text{H}_2\text{O}^{18}$  and (B)  $\text{H}_2\text{O}^{16}$ . 52%  $\text{O}^{18}$  incorporation was observed in benzaldehyde when reaction was carried out in presence of  $\text{H}_2\text{O}^{18}$

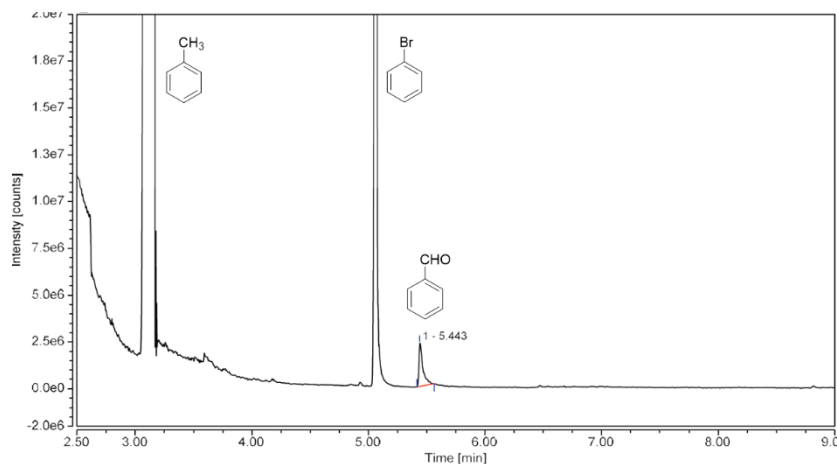

Figure S52. GC trace for the product formed upon reaction of **2** ( $2 \times 10^{-4}$  M) with toluene (500 equiv).

### 3F. High valent oxo intermediate formation by $\text{H}_2\text{O}_2$ treatment

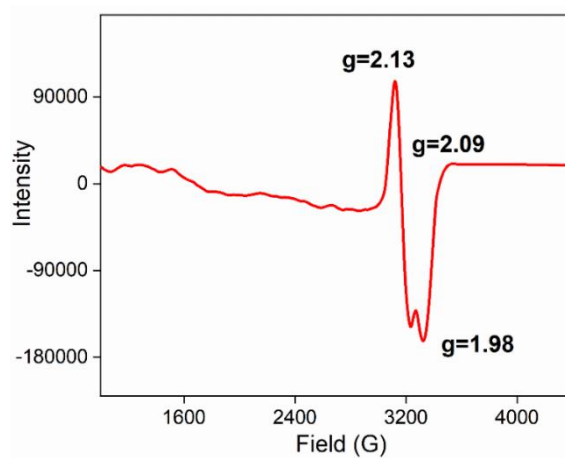

Figure S53. EPR of **3** formed upon treatment of 5 equiv hydrogen peroxide to **2** in 1:1  $\text{CH}_3\text{CN}$ -aq. pH 8.5 phosphate buffer (8 mM) at 85 K; the g-values indicate the formation of  $S = 1/2$  species.



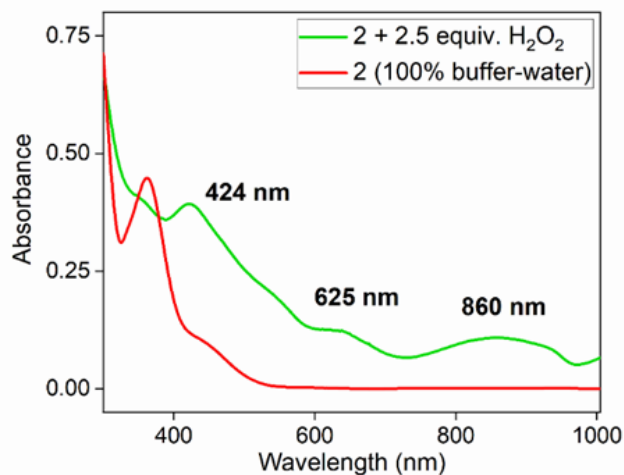

Figure S54. UV-Vis spectra of **2** (red) and the species (green) formed upon the addition of H<sub>2</sub>O<sub>2</sub> to **2** in 100% aqueous water (phosphate buffer pH 8.5).

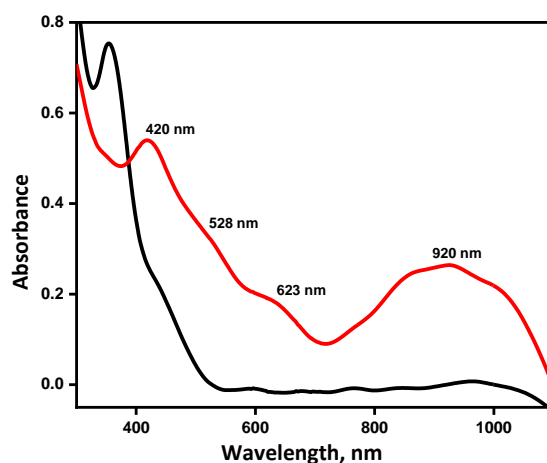

Figure S55. Formation of dimeric species (mixture of Fe<sup>III</sup>Fe<sup>IV</sup> and Fe<sup>IV</sup>Fe<sup>IV</sup>, characteristic broad band at ~900 nm) (red) upon addition of H<sub>2</sub>O<sub>2</sub> to **1A** (black) in both CH<sub>3</sub>CN-water (1:1) mixture and 100% water medium.

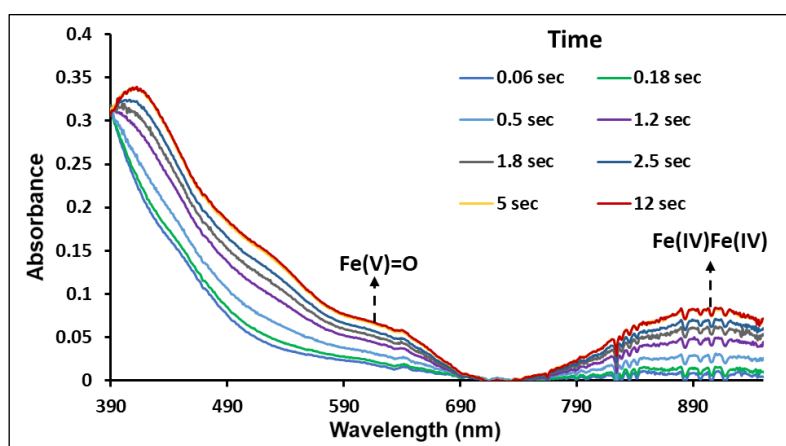

Figure S56. Stop flow formation kinetics of dimeric species (mixture of  $\text{Fe}^{\text{III}}\text{Fe}^{\text{IV}}$  and  $\text{Fe}^{\text{IV}}\text{Fe}^{\text{IV}}$ , characteristic broad band at  $\sim 900$  nm) upon addition of  $\text{H}_2\text{O}_2$  to **1A** in  $\text{CH}_3\text{CN}$ -water (1:1) medium.

### 3G. Procedure for preparative hydroxylation reaction

To a 25 mL round-bottom flask containing a magnetic stir bar, catalyst **2** (2-16  $\mu\text{mol}$ , 1-4 mol %), substrate (0.2-0.4 mmol scale) in 7 ml water (phosphate buffer, pH 8.5) were added. An aqueous solution of hydrogen peroxide ( $\text{H}_2\text{O}_2$ ) (0.4-1.2 mmol, 2-3 equiv) was added *via a* syringe pump with continuous stirring over a period of 2-5 h at room temperature. The reaction was monitored by TLC and/or GC. After completion of the reaction, the excess  $\text{H}_2\text{O}_2$  was quenched with a small amount of catalase. The resulting solution was saturated with NaCl and extracted with ethyl acetate (2-3 times). The organic part was dried with anhydrous  $\text{Na}_2\text{SO}_4$ , analyzed by GC-MS to estimate substrate conversion and then further purified by column chromatography to obtain the desired product (silica gel, 100-200 or 230-400 mesh). (NB: for more volatile substrates, evaporation was performed at reduced temperatures). The purity of the obtained product was determined by  $^1\text{H}$ ,  $^{13}\text{C}$  NMR, HRMS and GC-MS. The regioselectivity and diastereoselectivity in the products are in accordance with the NMR data of the reported products as referenced in the characterization data.

### 3H. Epoxidation Reaction Procedure

To a 2 mL glass vial containing a magnetic stir bar, catalyst **2** (0.2 mM, 0.5-2 mol %), substrate (10-40 mM) in 1 ml water (phosphate buffer, pH 8.5) were added. An aqueous solution of hydrogen peroxide ( $\text{H}_2\text{O}_2$ ) (1-2 equiv w.r.t substrate) was added *via a* syringe pump with continuous stirring over a period of 15-45 mins at room temperature. The reaction was monitored by GC-MS. After completion of the reaction, the excess  $\text{H}_2\text{O}_2$  was quenched with a small amount of catalase. The resulting solution was saturated with NaCl and extracted with ethyl acetate (2-3 times). The organic part was dried with anhydrous  $\text{Na}_2\text{SO}_4$ . The product yield and substrate conversion were quantified by GC-MS.

### 3I. Substrate scopes for C-H oxidation and epoxidation in $\text{CH}_3\text{CN}$ -water (1:1) solvent

Table S5. Substrate Scope for **3** catalyzed C-H bond oxidation in  $\text{CH}_3\text{CN}$ -water (1:1) solvent using  $\text{H}_2\text{O}_2$  as the oxidant

| Sl. No. | Substrate                                                                           | Product                                                                              | % Isolated yield (GC conversion) [selectivity] in $\text{CH}_3\text{CN}$ : water (1:1) solvent |
|---------|-------------------------------------------------------------------------------------|--------------------------------------------------------------------------------------|------------------------------------------------------------------------------------------------|
| 1       | 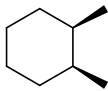 |  | 87(97%)<br>[Cis: Trans 98:2]                                                                   |

|    |                                                                                     |                                                                                      |                              |
|----|-------------------------------------------------------------------------------------|--------------------------------------------------------------------------------------|------------------------------|
| 2  | 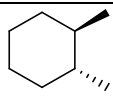   |    | 39(51%)<br>[Trans: Cis 97:3] |
| 3  |    |     | 85(96%)<br>[100% Cis]        |
| 4  |    |     | 51(68%)<br>[Trans :Cis 98:2] |
| 5  |    |    | 92(100%)<br>[A: K 80:20]     |
| 6  |    |   | 87(100%)<br>[A: K 95:5]      |
| 7  |  |   | 81(92%)<br>[100% 3°]         |
| 8  |  |   | 76(88%)<br>[100% 3°]         |
| 9  |  |  | 75(87%)<br>[100% 3°]         |
| 10 |  |  | 87(93%)<br>[100% A]          |
| 11 |  |  | 62(75%)<br>[100% A]          |
| 12 |  |  | 43(57%)<br>[100% 3°]         |

|    |                                                                                     |                                                                                      |                          |
|----|-------------------------------------------------------------------------------------|--------------------------------------------------------------------------------------|--------------------------|
| 13 | 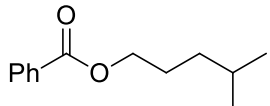   |    | 75(88%)<br>[3°:2° 90:10] |
| 14 |    |    | 70(91%)<br>[3°:2° 84:16] |
| 15 |    |    | 62(85%)<br>[3°:2° 85:15] |
| 16 |    |    | 64(84%)<br>[3°:2° 84:16] |
| 17 |    |    | 74(91%)<br>[K: A 90:10]  |
| 18 |    |     | 94(100%)<br>[100% K]     |
| 19 |   |   | 91(100%)<br>[100% K]     |
| 20 |  |  | 88(97%)<br>[100% K]      |
| 21 |  |   | 84(98%)<br>[100% K]      |
| 22 |  |   | 87(97%)<br>[100% K]      |
| 23 |  |  | 65(76%)<br>[100% A]      |
| 24 |  |   | 85(96%)<br>[100% K]      |

|    |                                                                                   |                                                                                    |                             |
|----|-----------------------------------------------------------------------------------|------------------------------------------------------------------------------------|-----------------------------|
| 25 | 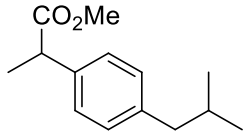 |  | 70(92%)<br>[K: A 92:8]      |
| 26 |  |  | 92(100%)<br>[100% K]        |
| 27 |  |  | 69(82%)<br>[25a :25b 80:20] |

Table S6. Substrate Scope for **3** catalyzed epoxidation in acetonitrile-water (1:1) solvent using H<sub>2</sub>O<sub>2</sub> as the oxidant

| Sl. No. | Substrate                                                                           | Product                                                                             | % GC yield (GC conversion) [selectivity] in CH <sub>3</sub> CN-water (1:1) solvent |
|---------|-------------------------------------------------------------------------------------|-------------------------------------------------------------------------------------|------------------------------------------------------------------------------------|
| 1       | 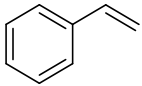 |  | 93(98%)                                                                            |
| 2       |  |  | 95(100%)                                                                           |
| 3       |  |  | 91(98%)                                                                            |
| 4       |  |  | 89(94%)                                                                            |

|   |                                                                                   |                                                                                   |                               |
|---|-----------------------------------------------------------------------------------|-----------------------------------------------------------------------------------|-------------------------------|
| 5 | 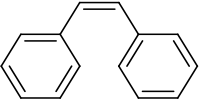 |  | 87(96%)<br>[Cis: Trans 90:10] |
| 6 |  |  | 85(94%)<br>[100% Trans]       |
| 7 |  |  | 97(100%)                      |

<sup>a</sup>0.2 mmol, <sup>b</sup>0.25 mmol, <sup>c</sup>0.27 mmol, <sup>d</sup>0.30 mmol, <sup>e</sup>0.4 mmol, <sup>f</sup>0.5 mmol scale; A and K denotes alcohol and ketone respectively. Loading: 2 mol% catalyst (1, 3, 5, 6, 10, 15, 16, 17, 18, 19, 20, 21, 22, 26); 3 mol% (2, 4, 7, 8, 9, 11, 23, 24, 25); 4 mol% (12, 27, 13, 14); For hydroxylation, % isolated yield (GC conversion)[selectivity] and for epoxidation, % GC yield based on standard (bromobenzene) (conversion)[selectivity], for alkenes 1 mol% loading(28, 29, 30, 31, 34); 2 mol% (32, 33); here selectivity was determined by GC.

### 3J. Comparison Studies

Table S7. Comparison study of different C-H bond substrates in 100% water medium w.r.t. CH<sub>3</sub>CN-water (1:1) medium using H<sub>2</sub>O<sub>2</sub>

| Entry No. | Substrate                                                                           | Product                                                                              | % Isolated yield (GC conversion) [selectivity] |                                  |
|-----------|-------------------------------------------------------------------------------------|--------------------------------------------------------------------------------------|------------------------------------------------|----------------------------------|
|           |                                                                                     |                                                                                      | Water (100% water)                             | CH <sub>3</sub> CN : water (1:1) |
| 1         | 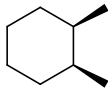 |  | 85 (100%)<br>[100% cis]                        | 87 (97%)<br>[cis:trans 98:2]     |
| 2         |  |  | 54 (68%)<br>[100% trans]                       | 39 (51%)<br>[trans:cis 97:3]     |
| 5         |  |  | 89 (96%)<br>[100% A]                           | 92 (100%)<br>[A: K 80:20]        |
| 6         |  |   | 82 (95%)<br>[100% A]                           | 87 (100%)<br>[A: K 95:5]         |

|    |  |  |                       |                              |
|----|--|--|-----------------------|------------------------------|
| 13 |  |  | 40 (50%)<br>[100% 3°] | 75 (88%)<br>[3°:2°<br>90:10] |
| 14 |  |  | 33 (49%)<br>[100% 3°] | 70 (91%)<br>[3°:2°<br>84:16] |

Table S8. Comparison between **3** catalyzed (H<sub>2</sub>O<sub>2</sub>, water and CH<sub>3</sub>CN-water 1:1) and **1B'** catalyzed (*m*CPBA, CH<sub>3</sub>CN-water 4:1) C-H bond oxidation.

| Entry No. | Product | % Isolated yield (GC conversion) [selectivity] |                                  |                                  |
|-----------|---------|------------------------------------------------|----------------------------------|----------------------------------|
|           |         | Water (100% buffer)                            | CH <sub>3</sub> CN : water (1:1) | Previous Report <sup>9</sup>     |
| 1         |         | 85 (100%)<br>[100% cis]                        | 87 (97%)<br>[cis:trans<br>98:2]  | 85 (97%)<br>[cis:trans<br>99:1]  |
| 2         |         | 54 (68%)<br>[100% trans]                       | 39 (51%)<br>[trans:cis<br>97:3]  | 60 (85%)<br>[trans:cis<br>76:24] |
| 3         |         | 79 (92%)<br>[100% cis]                         | 85 (96%)<br>[100% cis]           | 77 (90%)<br>[cis:trans<br>99:1]  |
| 4         |         | 48 (65%)<br>[100% trans]                       | 51 (68%)<br>[trans:cis<br>98:2]  | 27 (90%)<br>[trans:cis<br>38:62] |
| 7         |         | 67 (82%)<br>[100% 3°]                          | 81 (92%)<br>[100% 3°]            | 80 (93%)<br>[3°:2° 94:6]         |
| 10        |         | 77 (95%)<br>[100% 3°]                          | 87 (93%)<br>[100% 3°]            | 52 (76%)<br>[3°:2°<br>75:25]     |
| 11        |         | 56 (75%)<br>[100% 3°]                          | 62 (75%)<br>[100% 3°]            | 51 (70%)<br>[3°:2° 95:5]         |
| 15        |         | 71 (92%)<br>[3°:2°<br>86:14]                   | 62 (85%)<br>[3°:2°<br>85:15]     | 65 (85%)<br>[3°:2°<br>86:14]     |

|    |  |                                            |                                            |                                                    |
|----|--|--------------------------------------------|--------------------------------------------|----------------------------------------------------|
| 16 |  | 66 (84%)<br>[3°:2°<br>85:15]               | 64 (84%)<br>[3°:2°<br>84:16]               | 80 (93%)<br>[3°:2°<br>89:11]                       |
| 23 |  | 52 (68%)<br>[100% A]                       | 65 (76%)<br>[100% A]                       | 80 (89%)<br>[100% A]                               |
| 24 |  | 80 (93%)<br>[100% K]                       | 85 (96%)<br>[100% K]                       | 90 (99%)<br>[100% K]                               |
| 25 |  | 65 (86%)<br>[K: A 92:8]                    | 70 (92%)<br>[K: A 92:8]                    | 50 (82%)                                           |
| 26 |  | 85 (95%)<br>[100% K]                       | 92 (100%)<br>[100% K]                      | 68 (76%)<br>[100% K]                               |
| 27 |  | 62 (82%)<br>[27a:27b<br>80:20]<br>[100% A] | 69 (82%)<br>[27a:27b<br>80:20]<br>[100% A] | 55 (72%)<br>[27a:27b<br>75:25]<br>[3°:2°<br>85:15] |

### 3K. Product Characterization Data

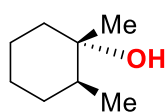

1. (1*S*,2*S*)+(1*R*,2*R*)-1,2-dimethylcyclohexanol<sup>9</sup> (Table 2, entry 1): (0.4 mmol scale) Purified by column chromatography using 5.7:1 hexane:EtOAc. Isolated yield: 85%, 44 mg. TLC  $R_f$  = 0.6 (4:1 hexane:EtOAc). <sup>1</sup>H NMR (400.13 MHz, CDCl<sub>3</sub>)  $\delta$  1.73-1.63 (m, 4H), 1.53-1.47 (m, 1H), 1.41-1.29 (m, 2H), 1.28-1.25 (m, 2H), 1.10 (s, 3H), 0.93-0.91 (d, 3H,  $J$  = 6.85 Hz); <sup>13</sup>C NMR (100.61 MHz, CDCl<sub>3</sub>)  $\delta$  73.09, 42.35, 41.39, 32.08, 25.32, 24.16, 20.88, 15.23 ppm; GC-MS (EI)  $m/z$ : M<sup>+</sup> peak: 128.20, base peak: 71.08, tR: 5.89 min.

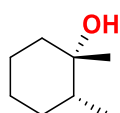



2. (1*S*,2*R*)+(1*R*,2*S*)-1,2-dimethylcyclohexanol<sup>9</sup> (Table 2, entry 2): (0.4 mmol scale) Purified by column chromatography using 19:1 hexane:EtOAc. Isolated yield: 44%, 23 mg. TLC  $R_f$  = 0.5 (7:3 hexane:EtOAc); <sup>1</sup>H NMR (400.13 MHz, CDCl<sub>3</sub>, δ, ppm) δ 1.89-1.34 (m, 10H), 1.19 (s, 3H), 0.92-0.91 (d, 3H,  $J$  = 6.10 Hz); <sup>13</sup>C NMR (100.61 MHz, CDCl<sub>3</sub>) δ 71.99, 41.97, 39.56, 31.14, 29.69, 24.91, 22.07, 14.71 ppm; GC-MS (EI)  $m/z$ :  $M^+$  peak: 128.21, base peak: 71.02,  $t_R$ : 5.59 min.

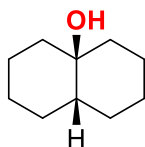

3. *cis*-9-Decalinol<sup>9</sup> (Table 2, entry 3): (0.4 mmol scale) Purified by column chromatography using 6:1 hexane:EtOAc. Isolated yield: 61%, 38 mg. TLC  $R_f$  = 0.7 (7:3 hexane:EtOAc). <sup>1</sup>H NMR (200.13 MHz, CDCl<sub>3</sub>); δ 1.90–1.15 (m, 18H); <sup>13</sup>C NMR (50.32 MHz, CDCl<sub>3</sub>) δ 71.78, 42.75, 29.67, 27.98 (br), 23.06 (br) ppm; GC-MS (EI)  $m/z$ :  $M^+$  peak: 154.08, base peak: 111.04,  $t_R$ : 8.97 min.

<sup>1</sup>H NMR:

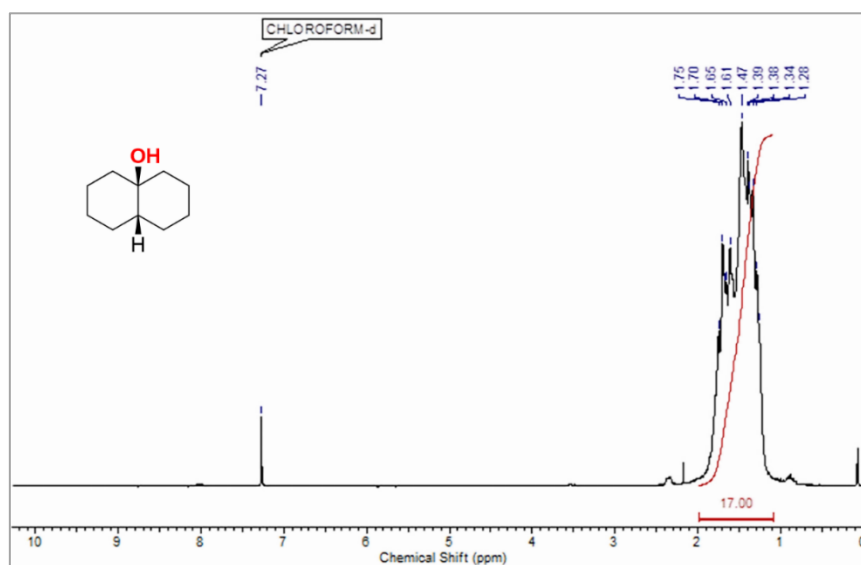

<sup>13</sup>C NMR:

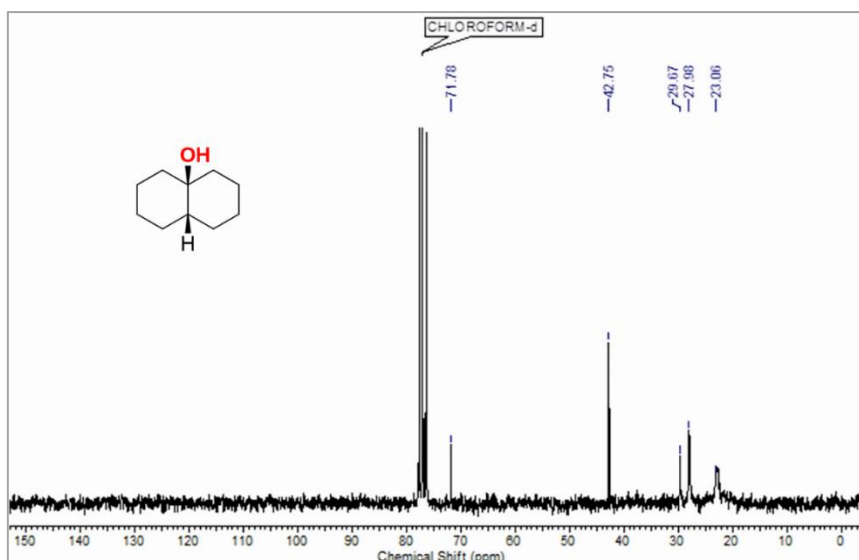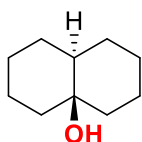

4. *trans*-9-Decalinol<sup>9</sup> (Table 2, entry 4): (0.6 mmol scale) Purified by column chromatography using 19:1 hexane:EtOAc. Isolated yield: 38%, 36 mg. TLC  $R_f$  = 0.6 (3:1 hexane:EtOAc);  $^1\text{H}$  NMR (400.13 MHz,  $\text{CDCl}_3$ )  $\delta$  2.42-1.87 (m, 1H), 1.64-1.48 (m, 7H), 1.34-1.19 (m, 8H);  $^{13}\text{C}$  NMR (50.32 MHz,  $\text{CDCl}_3$ )  $\delta$  71.33, 39.70, 28.63, 28.25, 21.63 ppm. GC-MS (EI)  $m/z$ :  $\text{M}^+$  peak: 154.23, base peak: 111.05,  $t_R$ : 8.62 min.

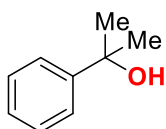

5. 2-Phenyl-2-propanol<sup>10</sup> (Table 2, entry 5): (0.4 mmol scale) Purified by column chromatography using 19:1 hexane:EtOAc. Isolated yield: 89%, 48 mg. TLC  $R_f$  = 0.5 (4:1 hexane:EtOAc).  $^1\text{H}$  NMR (500 MHz,  $\text{CDCl}_3$ )  $\delta$  7.51 (d,  $J$  = 8.2 Hz, 2H), 7.36 (t,  $J$  = 7.7 Hz, 2H), 7.26 (d,  $J$  = 14.8 Hz, 1H), 1.60 (s, 6H).  $^{13}\text{C}$  NMR (126 MHz,  $\text{CDCl}_3$ )  $\delta$  149.23, 128.30, 126.77, 124.48, 72.61, 31.82. GC-MS (EI)  $m/z$ :  $\text{M}^+$  peak: 135.71, base peak: 121.10,  $t_R$ : 5.868 min.

$^1\text{H}$  NMR:

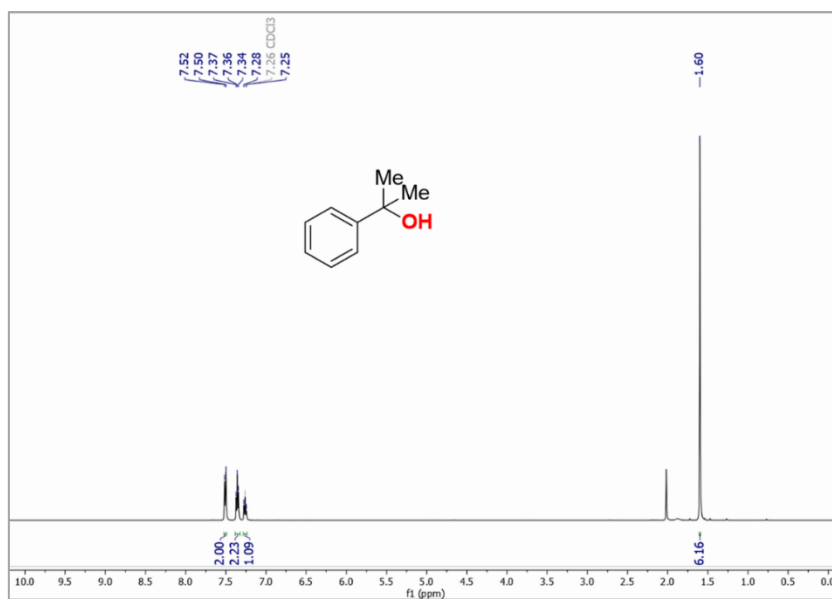

$^{13}\text{C}$  NMR:

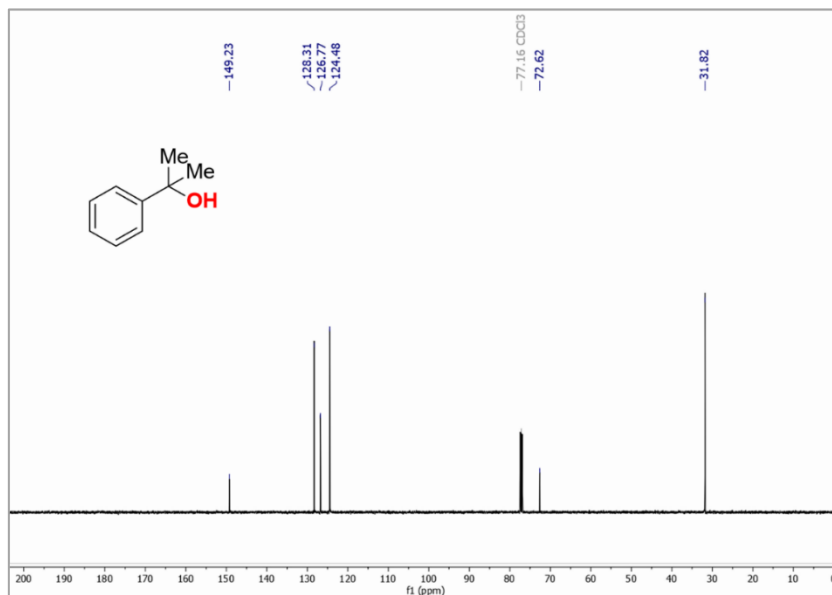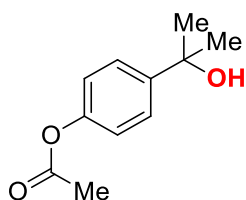

6. *4-(2-hydroxypropan-2-yl)phenyl acetate* (Table 2, entry 6): (0.4 mmol scale) Purified by column chromatography using 7:1 hexane:EtOAc. Isolated yield: 82%, 63 mg. TLC  $R_f$  = 0.3 (8:2 hexane:EtOAc).  $^1\text{H}$  NMR (500 MHz,  $\text{CDCl}_3$ )  $\delta$  7.47 (d,  $J$  = 8.5 Hz, 2H), 7.02 (d,  $J$  = 8.5 Hz, 2H), 2.27 (s, 3H), 2.10 (s, 1H), 1.55 (s, 6H);  $^{13}\text{C}$  NMR (126 MHz,  $\text{CDCl}_3$ )  $\delta$  169.73, 149.38, 146.83, 125.71, 121.18, 72.33, 31.82, 21.18. HRMS (ESI)  $m/z$  calc'd  $\text{C}_{11}\text{H}_{14}\text{O}_3\text{Na}$   $[\text{M}+\text{Na}]^+$ : 217.0943, found 217.0941.

$^1\text{H}$  NMR:

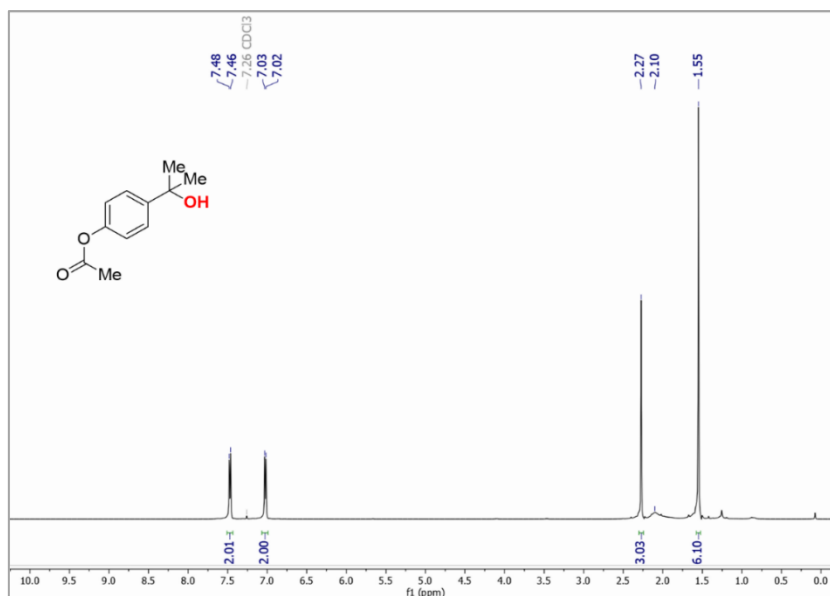

$^{13}\text{C}$  NMR:

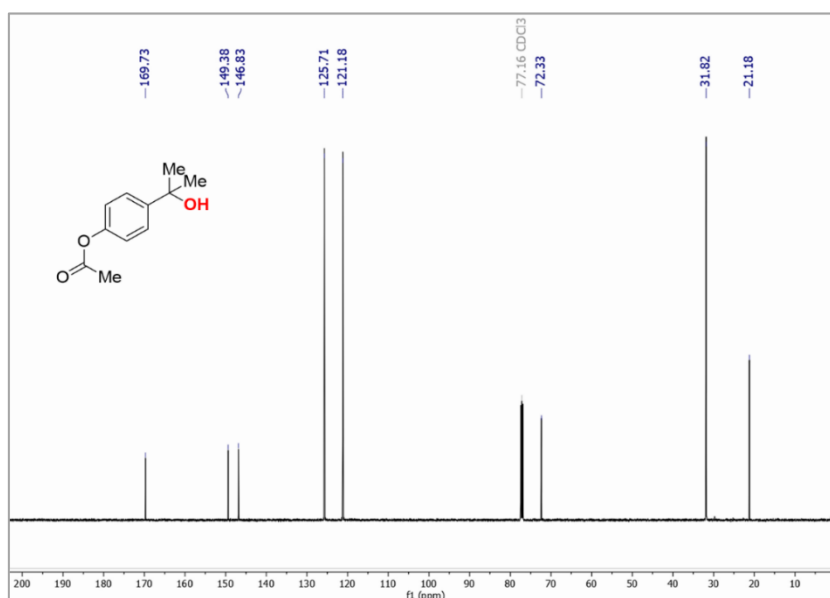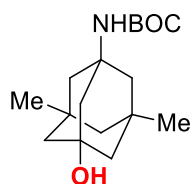

7. tert-butyl((1r,3s,5R,7S)-3-hydroxy-5,7-dimethyladamantan-1-yl)carbamate<sup>9</sup> (Table 2, entry 7): (0.27 mmol scale) Purified by column chromatography using 1:1 hexane:EtOAc. Isolated yield: 67%, 53 mg. TLC  $R_f$  = 0.3 (7:3 hexane:EtOAc).  $^1\text{H}$  NMR (400.13 MHz,  $\text{CDCl}_3$ )  $\delta$  4.47 (s, 1H), 1.79 (s, 2H), 1.59 (s, 4H), 1.473 (s, 9H), 1.38-1.36 (m, 4H), 1.10-1.09 (d, 2H,  $J$  = 4.48 Hz), 0.93 (s, 6H);  $^{13}\text{C}$  NMR (100.61 MHz,  $\text{CDCl}_3$ )  $\delta$  153.87, 78.69, 70.08, 53.53, 50.11, 49.13,

47.70, 46.42, 33.82, 28.81, 28.11 ppm; HRMS (ESI)  $m/z$  calc'd  $C_{17}H_{29}O_3NNa$   $[M+Na]^+$ : 318.2040, found 318.2038.

$^1H$  NMR:

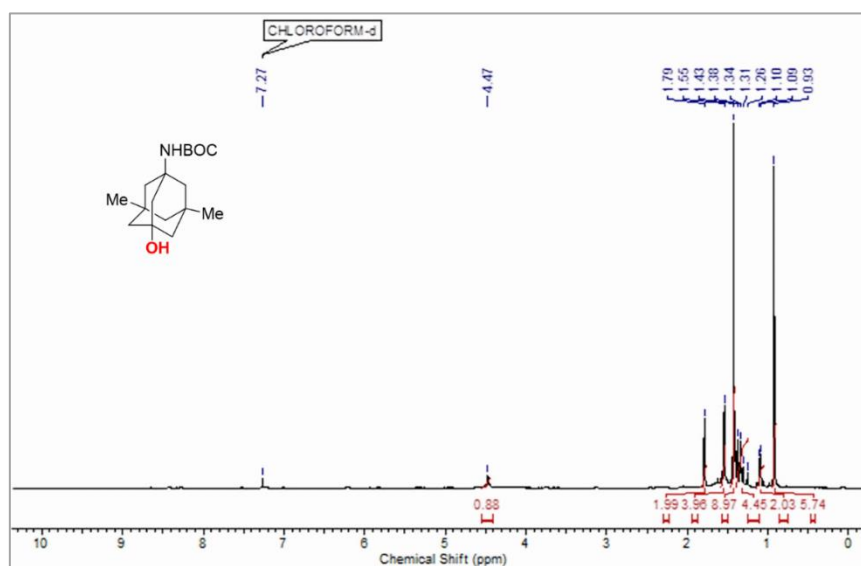

$^{13}C$  NMR:

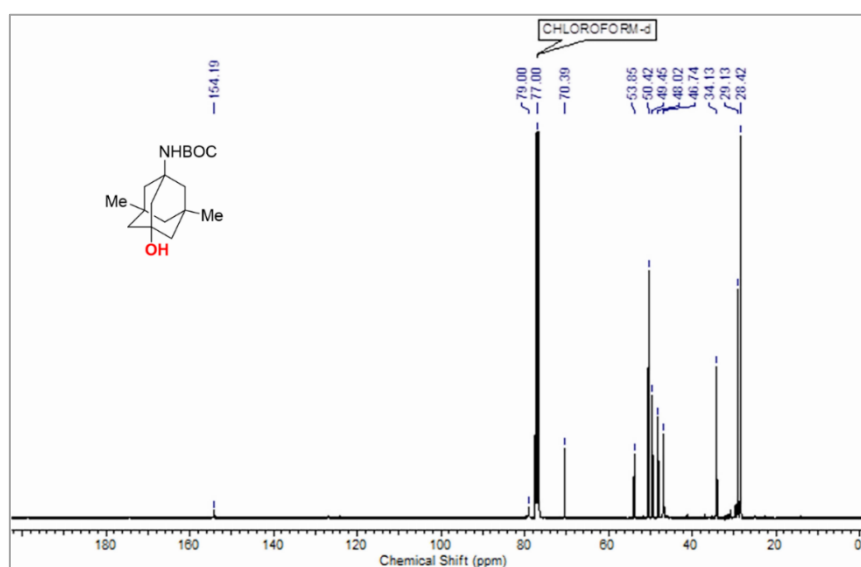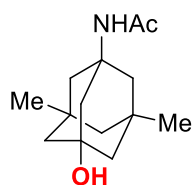

8.N-(3-Hydroxy-5,7-dimethyladamantan-1-yl)acetamide<sup>11</sup> (Table 2, entry 8): Purified by column chromatography by using 1:4 hexane:EtOAc. Isolated yield (0.3 mmol scale): 52%, 37 mg. TLC  $R_f$  = 0.5 (EtOAc).  $^1H$  NMR (500 MHz,  $CDCl_3$ )  $\delta$  5.25 (s, 1H), 1.91 (s, 3H), 1.87 (s, 2H), 1.60 (d,  $J$  = 12.4 Hz, 5H), 1.41 (d,  $J$  = 11.4 Hz, 2H), 1.34 (s, 2H), 1.11 (d,  $J$  = 11.1 Hz,

2H), 0.92 (s, 6H).  $^{13}\text{C}$  NMR (126 MHz,  $\text{CDCl}_3$ )  $\delta$  169.67, 70.46, 55.30 (2C), 50.53, 49.61, 47.78, 46.63 (2C), 34.29, 29.84, 29.26, 24.72. HRMS (ESI)  $m/z$  calc'd  $\text{C}_{14}\text{H}_{23}\text{O}_2\text{NNa}$   $[\text{M}+\text{Na}]^+$ : 260.1729, found 260.1721.

$^1\text{H}$  NMR:

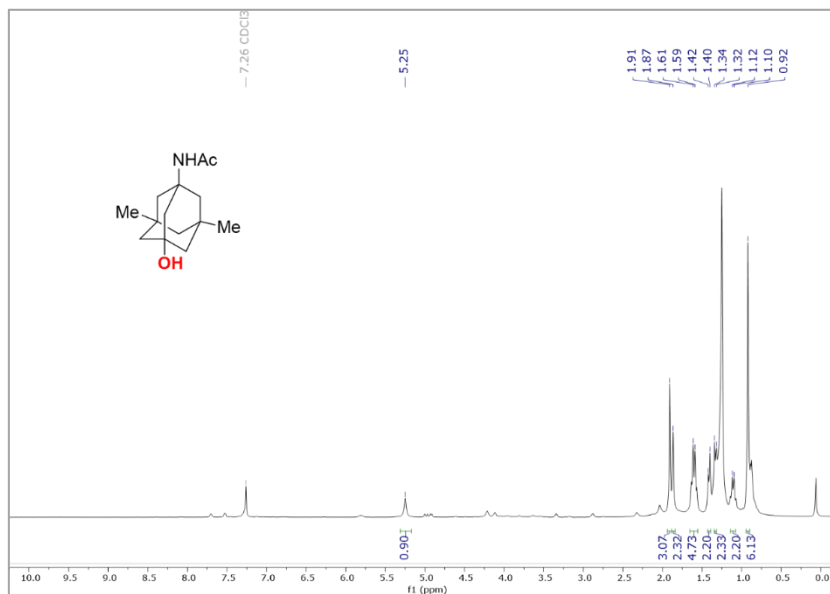

$^{13}\text{C}$  NMR:

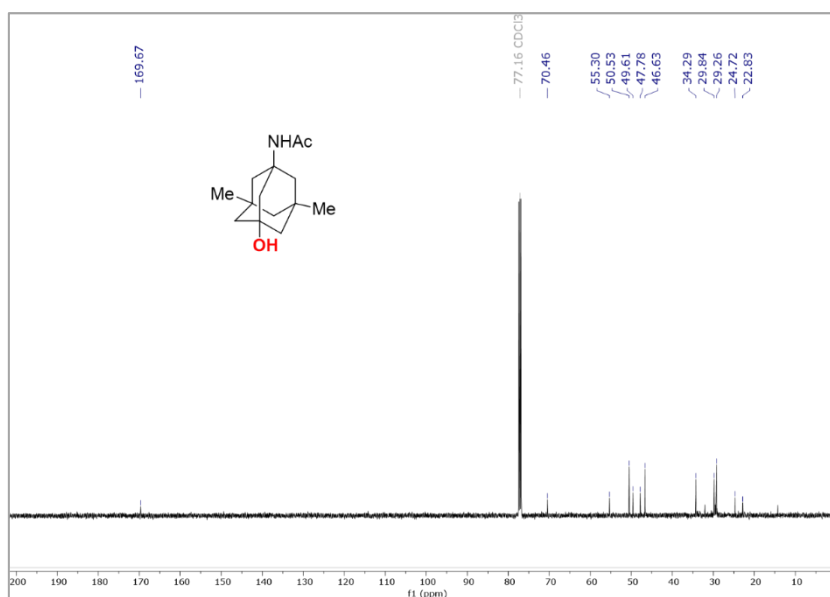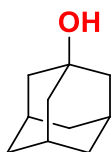

9. Adamantan-1-ol<sup>12</sup> (Table 2, entry 9): (0.4 mmol scale) Purified by column chromatography using 19:1 hexane:EtOAc. Isolated yield: 53%, 33 mg. TLC  $R_f$  = 0.5 (9:1 hexane:EtOAc).  $^1\text{H}$  NMR (500 MHz,  $\text{CDCl}_3$ )  $\delta$  2.11 (br s, 3H), 1.69 (br d,  $J$  = 3.2 Hz, 6H), 1.59 (m, 6H), 1.56 (m,

<sup>1</sup>H). <sup>13</sup>C NMR (126 MHz, CDCl<sub>3</sub>) δ 68.30, 45.45, 36.19, 30.69. GC-MS (EI) m/z: M<sup>+</sup> peak: 152.12, base peak: 95.07, tR: 7.75 min.

<sup>1</sup>H NMR:

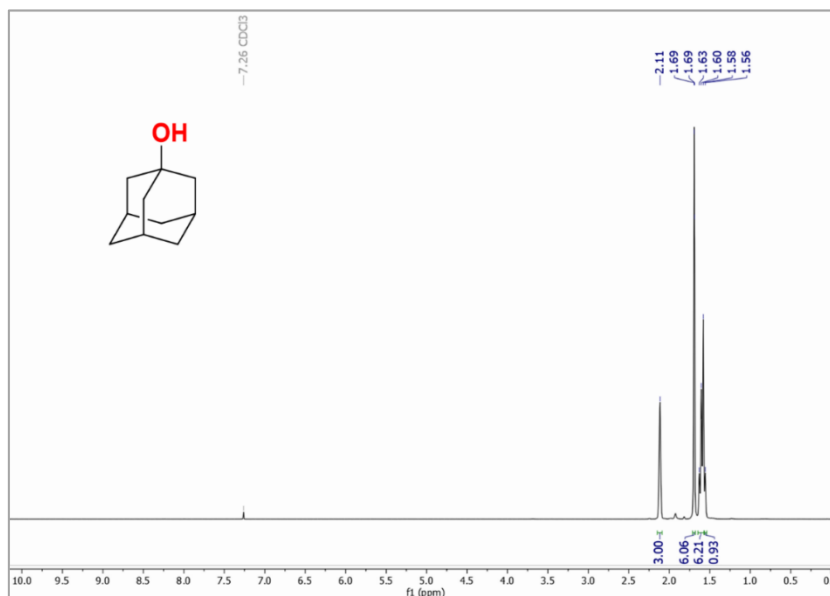

<sup>13</sup>C NMR:

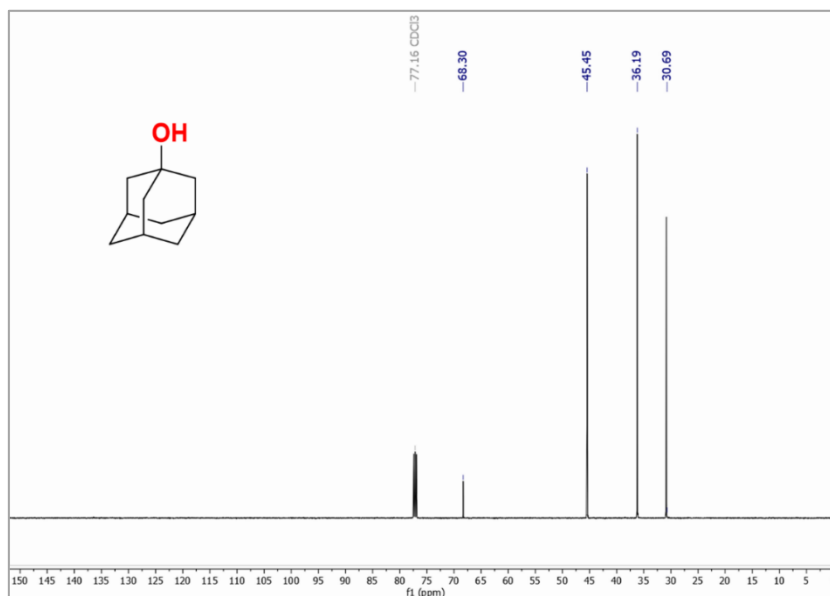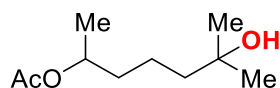

10. *6-hydroxy-6-methylheptan-2-yl acetate*<sup>9</sup> (Table 2, entry 10): Purified by column chromatography using 4:1 hexane:EtOAc. Isolated yield (0.4 mmol scale): 67%, 55 mg. TLC  $R_f$  = 0.6 (7:3 hexane:EtOAc). <sup>1</sup>H NMR (500 MHz, CDCl<sub>3</sub>) δ 4.90 (q,  $J$  = 6.3 Hz, 1H), 2.01 (s, 3H), 1.59 (dq,  $J$  = 8.9, 4.1 Hz, 1H), 1.50 – 1.36 (m, 5H), 1.23 (d,  $J$  = 9.2 Hz, 3H), 1.19 (s, 6H);

$^{13}\text{C}$  NMR (126 MHz,  $\text{CDCl}_3$ )  $\delta$  171.03, 71.03, 70.97, 43.62, 36.45, 29.81, 29.28, 21.50, 20.26, 20.10 ppm; HRMS (ESI)  $m/z$  calc'd  $\text{C}_{10}\text{H}_{20}\text{O}_3\text{Na}$   $[\text{M}+\text{Na}]^+$ : 211.1305, found 211.1306.

$^1\text{H}$  NMR:

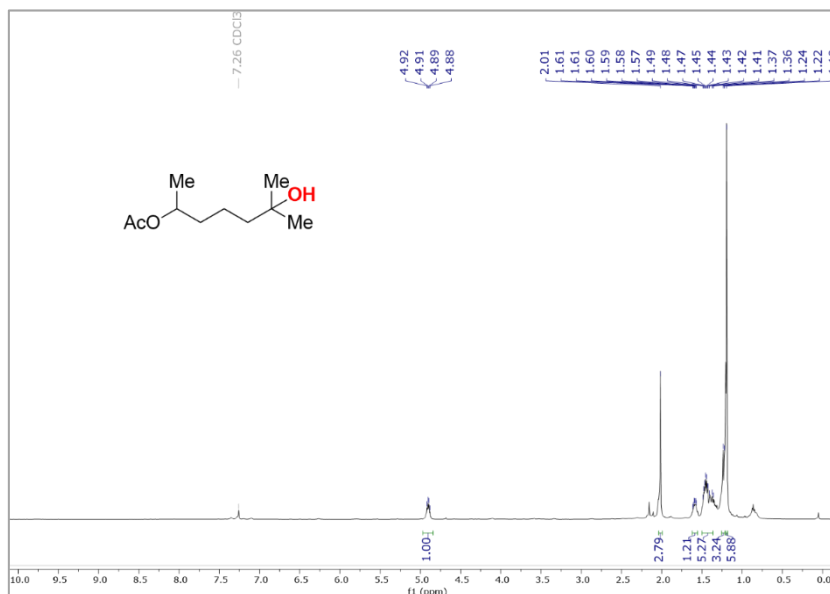

$^{13}\text{C}$  NMR:

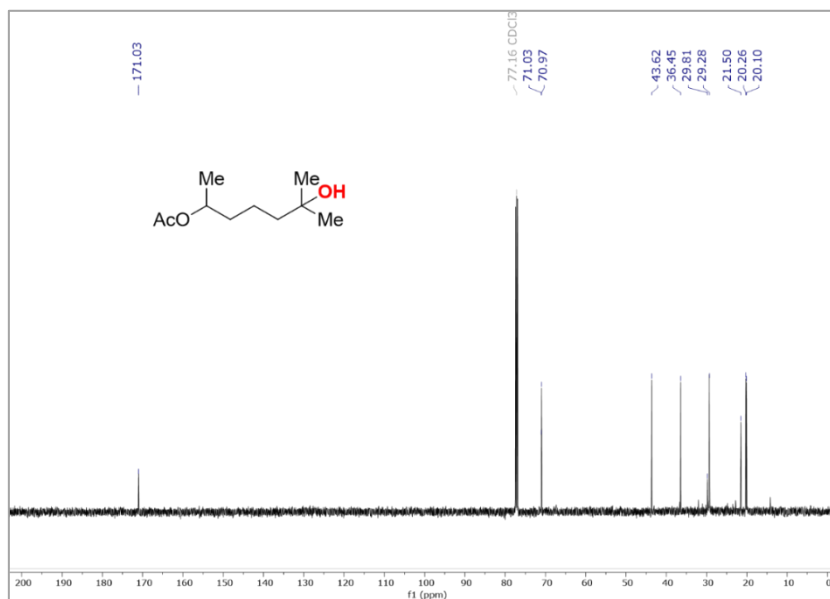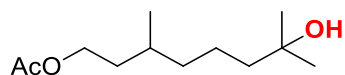

11. *7-hydroxy-3,7-dimethyloctyl acetate*<sup>9</sup> (Table 2, entry 11): (0.4 mmol scale) Purified by column chromatography using 4:1 hexane:EtOAc. Isolated yield: 51%, 44 mg. TLC  $R_f$  = 0.5 (3:1 hexane:EtOAc).  $^1\text{H}$  NMR (500 MHz,  $\text{CDCl}_3$ )  $\delta$  4.15 – 4.04 (m, 2H), 2.04 (s, 3H), 1.70 – 1.62 (m, 2H), 1.57 – 1.52 (m, 2H), 1.47 – 1.38 (m, 4H), 1.35 – 1.29 (m, 2H), 1.21 (s, 6H), 0.91 (d,  $J$  = 6.6 Hz, 3H).  $^{13}\text{C}$  NMR (126 MHz,  $\text{CDCl}_3$ )  $\delta$  171.41, 71.18, 63.17, 44.25, 37.52, 35.63,



29.99, 29.46, 29.40, 21.75, 21.19, 19.61. HRMS (ESI)  $m/z$  calc'd  $C_{12}H_{24}O_3Na$   $[M+Na]^+$ : 239.1618, found 239.1619.

$^1H$  NMR:

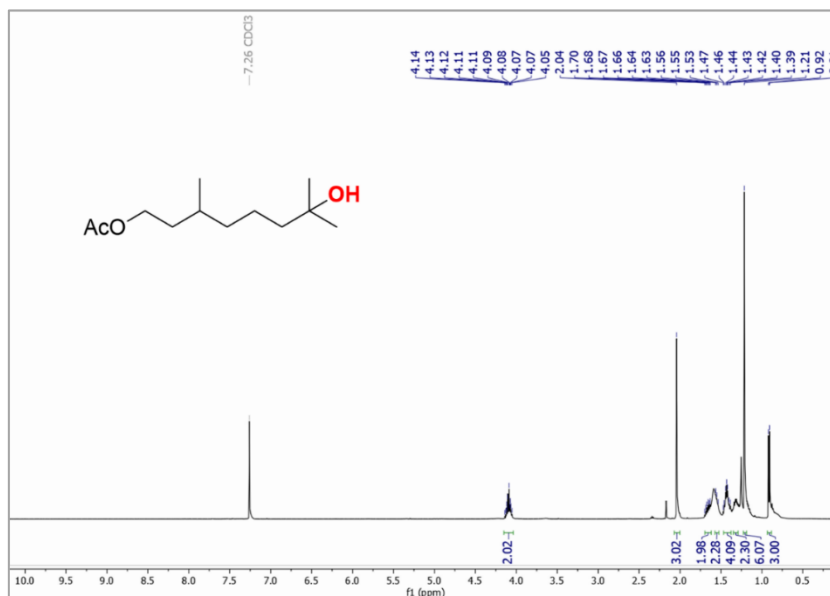

$^{13}C$  NMR:

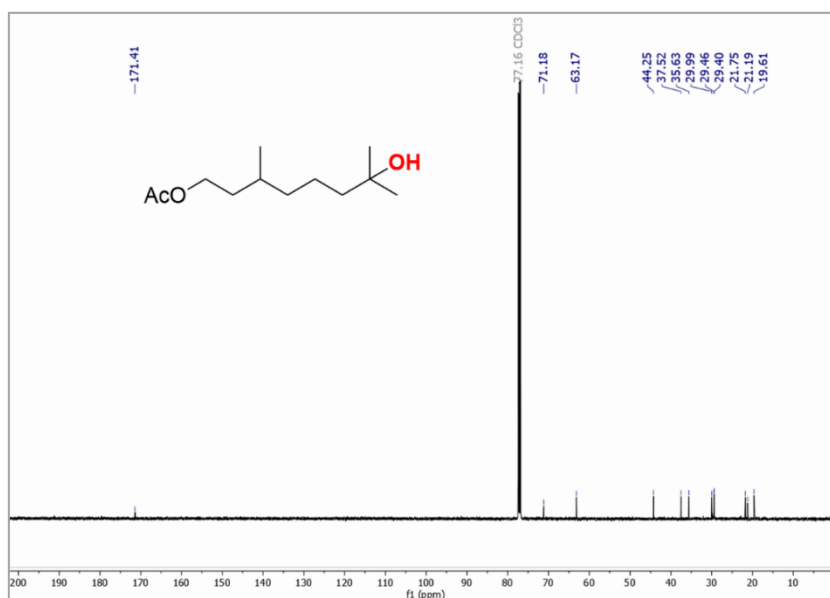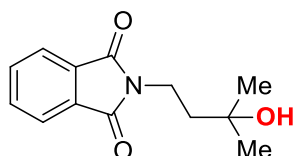

12. 2-(3-hydroxy-3-methylbutyl)isoindoline-1,3-dione<sup>13</sup> (Table 2, entry 12): (0.4 mmol scale)  
The product was purified over silica gel column chromatography using 1:9 EtOAc-hexane as the eluent, gave the product as a colourless oil. Isolated yield 56 mg, 61%; TLC  $R_f$  = 0.4 (1:4

EtOAc/hexane).  $^1\text{H}$  NMR (500 MHz,  $\text{CDCl}_3$ )  $\delta$  7.85 – 7.81 (m, 2H), 7.72 – 7.67 (m, 2H), 3.84 (t,  $J = 7.6$  Hz, 2H), 2.76 (s, 1H), 1.85 (t,  $J = 7.6$  Hz, 2H), 1.30 (s, 6H).  $^{13}\text{C}$  NMR (126 MHz,  $\text{CDCl}_3$ )  $\delta$  168.63, 134.44, 134.03, 123.72, 123.33, 70.07, 41.56, 34.13, 29.54. HRMS (ESI)  $m/z$  calc'd  $\text{C}_{13}\text{H}_{15}\text{NO}_3\text{Na}$   $[\text{M}+\text{Na}]^+$ : 256.1052, found 256.1047.

$^1\text{H}$  NMR:

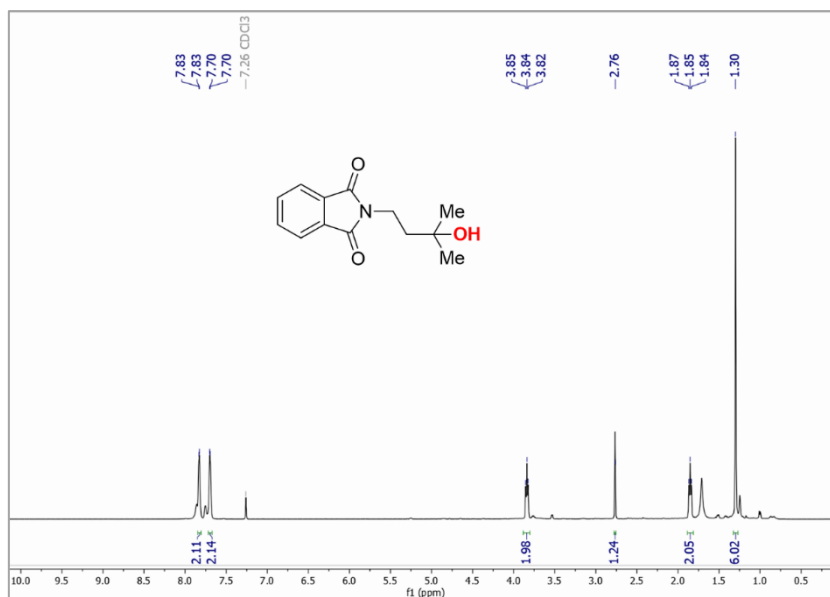

$^{13}\text{C}$  NMR:

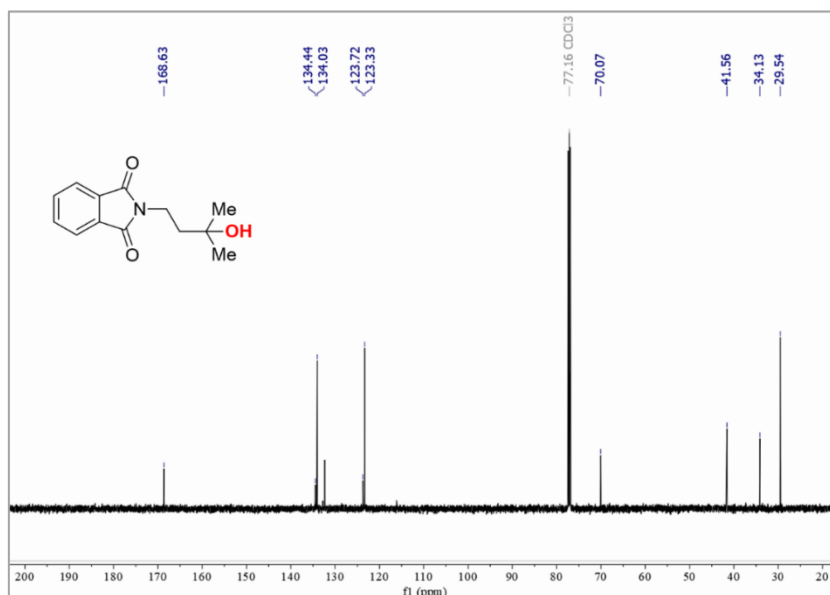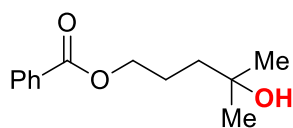

13. 4-hydroxy-4-methylpentyl benzoate<sup>14</sup> (Table 2, entry 13): (0.4 mmol scale) The product was purified by chromatography on silica gel (1:3 EtOAc/hexanes); colourless oil was obtained;

isolated yield 39 mg, 40%; TLC  $R_f = 0.5$  (3:7 EtOAc/hexanes)  $^1\text{H}$  NMR (500 MHz,  $\text{CDCl}_3$ )  $\delta$  8.04 (d,  $J = 7.6$  Hz, 2H), 7.55 (t,  $J = 6.9$  Hz, 1H), 7.44 (t,  $J = 7.4$  Hz, 2H), 4.35 (t,  $J = 6.4$  Hz, 2H), 1.94 – 1.80 (m, 2H), 1.72 – 1.53 (m, 2H), 1.26 (s, 6H).  $^{13}\text{C}$  NMR (126 MHz,  $\text{CDCl}_3$ )  $\delta$  166.81, 133.02, 130.52, 129.68, 128.49, 70.87, 65.50, 40.13, 29.83, 29.44, 24.03. HRMS (ESI)  $m/z$  calc'd  $\text{C}_{13}\text{H}_{18}\text{O}_3\text{Na}$   $[\text{M}+\text{Na}]^+$ : 245.1256, found 245.1301

$^1\text{H}$  NMR:

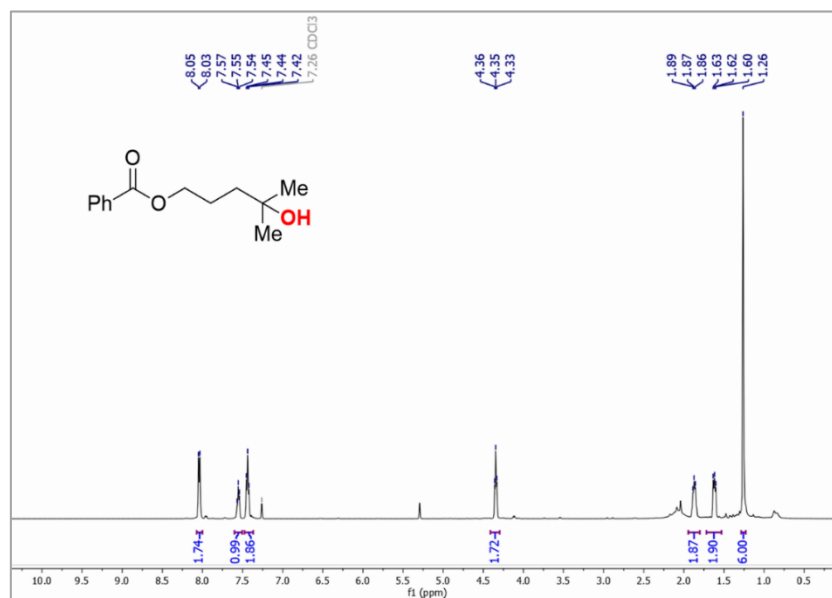

$^{13}\text{C}$  NMR:

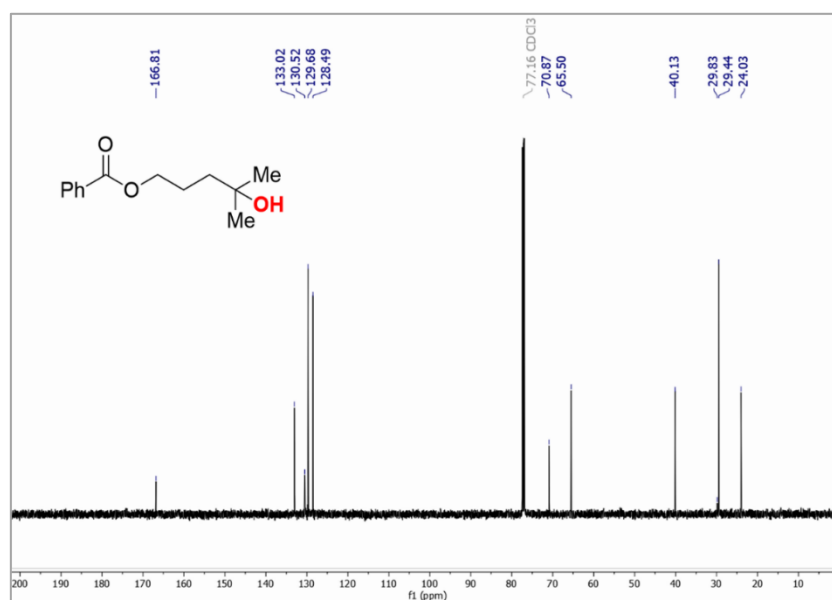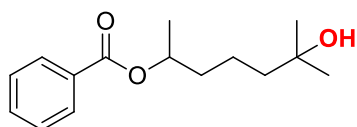

14. *6-hydroxy-6-methylheptan-2-yl benzoate*<sup>9</sup> (Table 2, entry 14): (0.4 mmol scale) Purified by column chromatography using 3:1 hexane:EtOAc. Isolated yield: 23%, 24 mg. TLC  $R_f$  = 0.5 (7:3 hexane:EtOAc). <sup>1</sup>H NMR (400.13 MHz, CDCl<sub>3</sub>) δ 8.06-8.04 (d, 2H, J = 7.82), 7.58-7.54 (t, 1H, J = 14.67 Hz), 7.46-7.43 (2H, t, J = 15.16 Hz), 5.22-5.17 (m, 1H), 1.79-1.75 (m, 1H), 1.66-1.62 (m, 1H), 1.54-1.50 (m, 3H), 1.46-1.42 (m, 2H), 1.37-1.35 (d, 3H, J = 6.36 Hz), 1.21 (s, 6H); <sup>13</sup>C NMR (100.61 MHz, CDCl<sub>3</sub>) δ 166.56, 133.04, 131.12, 129.81, 128.60, 71.77, 71.17, 43.86, 36.80, 29.99, 29.59, 29.51, 20.51, 20.40 ppm; HRMS (ESI) m/z calc'd for C<sub>15</sub>H<sub>22</sub>O<sub>3</sub>Na [M+Na]<sup>+</sup>: 273.1461, found 273.1459.

<sup>1</sup>H NMR:

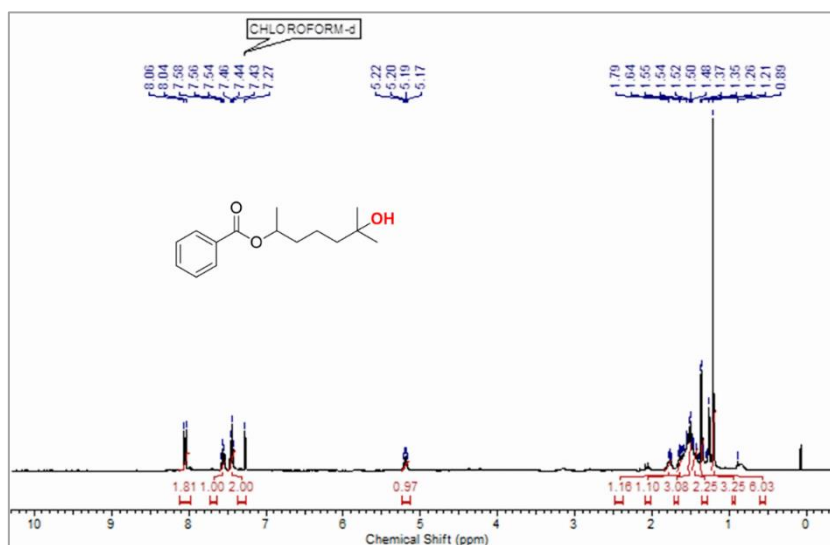

<sup>13</sup>C NMR:

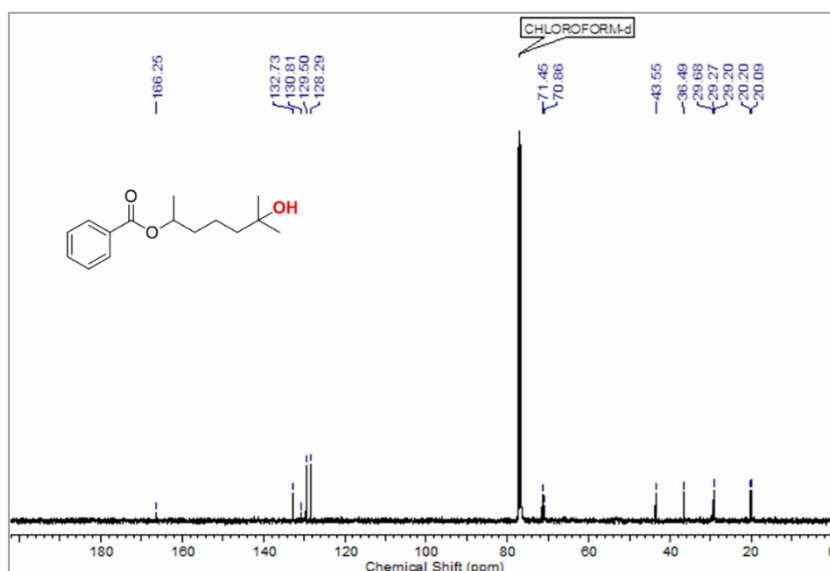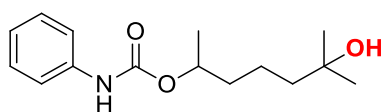

15. *6-hydroxy-6-methylheptan-2-yl phenylcarbamate*<sup>9</sup> (Table 2, entry 15): (0.2 mmol scale)  
Purified by column chromatography using 7:3 hexane:EtOAc. Isolated yield: 71%, 38 mg. TLC  
 $R_f = 0.4$  (7:3 hexane:EtOAc).  $^1\text{H NMR}$  (400.13 MHz,  $\text{CDCl}_3$ )  $\delta$  7.40-7.38 (d, 2H,  $J = 8.31$  Hz),  
7.33-7.27 (m, 2H), 7.08-7.04 (t, 1H,  $J = 14.64$  Hz), 6.59 (s, 1H), 4.96-4.92 (m, 1H), 1.62 (bs,  
2H), 1.51-1.45 (m, 4H), 1.30-1.29 (d, 2H,  $J = 6.36$  Hz), 1.22 (s, 6H);  $^{13}\text{C NMR}$  (100.61 MHz,  
 $\text{CDCl}_3$ )  $\delta$  153.68, 138.36, 129.34, 123.58, 118.86, 72.19, 71.18, 43.86, 36.88, 29.64, 29.54,  
20.57, 20.45 ppm; HRMS (ESI)  $m/z$  calc'd  $\text{C}_{15}\text{H}_{23}\text{O}_3\text{NNa}$   $[\text{M}+\text{Na}]^+$ : 288.1570, found  
288.1568.

$^1\text{H NMR}$ :

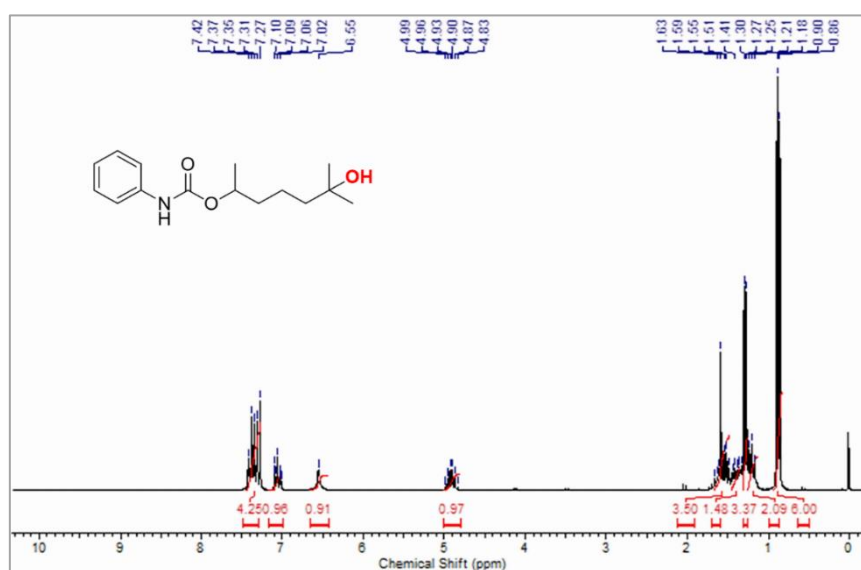

$^{13}\text{C NMR}$ :

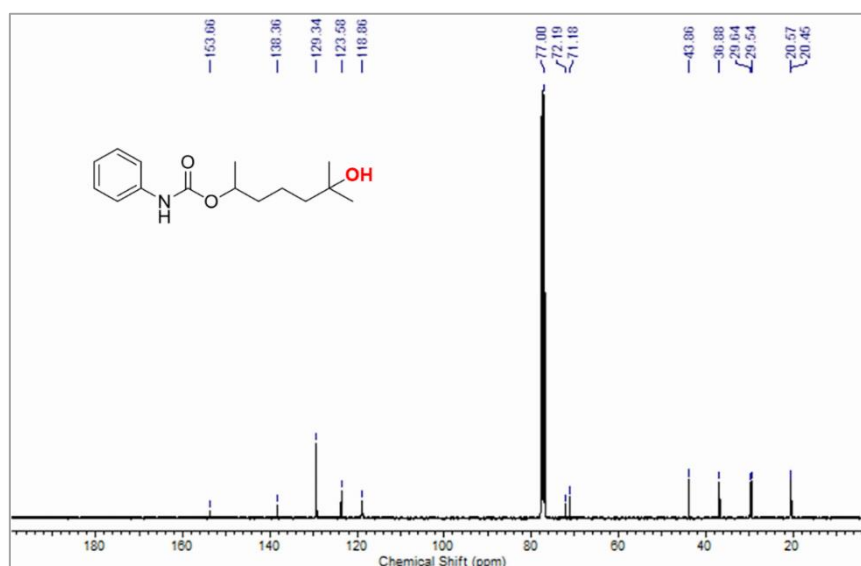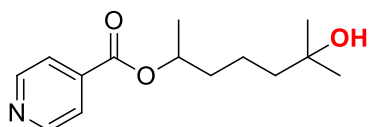

16. *6-hydroxy-6-methylheptan-2-yl isonicotinate*<sup>9</sup> (Table 2, entry 16): (0.4 mmol scale)  
Purified by column chromatography using 1:1 hexane:EtOAc. Isolated yield: 66%, 66 mg. TLC  
 $R_f = 0.3$  (1:1 hexane:EtOAc).  $^1\text{H}$  NMR (400.13 MHz,  $\text{CDCl}_3$ )  $\delta$  8.78-8.76 (d, 2H,  $J = 5.49$  Hz),  
7.85-7.84 (d, 2H,  $J = 6.10$  Hz), 5.25-5.17 (sxt,  $J = 6.2 \times (5)$ , 1H), 1.79-1.74 (m, 1H), 1.67-1.62  
(m, 1H), 1.51-1.49 (m, 3H), 1.38-1.36 (d, 3H  $J = 6.10$  Hz), 1.26 (bs, 2H), 1.21 (s, 6H);  $^{13}\text{C}$   
NMR (100.61 MHz,  $\text{CDCl}_3$ )  $\delta$  165.02, 150.81, 138.27, 123.14, 73.03, 71.05, 43.75, 36.64,  
29.98, 29.56, 20.44, 20.26 ppm; HRMS (ESI)  $m/z$  calc'd  $\text{C}_{14}\text{H}_{22}\text{O}_3\text{N}$   $[\text{M}+\text{Na}]^+$ : 252.1594,  
found 252.1595

$^1\text{H}$  NMR:

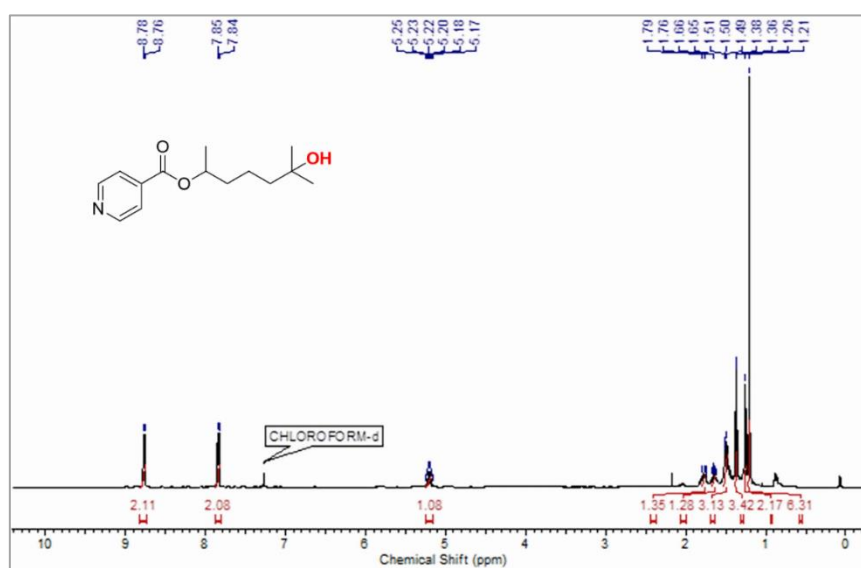

$^{13}\text{C}$  NMR:

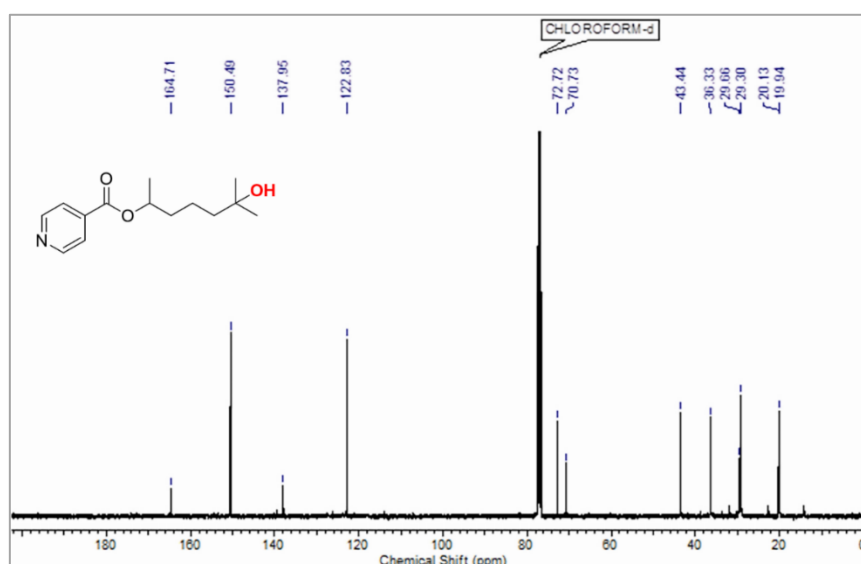

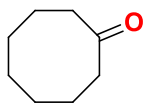

17. *Cyclooctanone*<sup>15</sup> (Table 2, entry 17): (0.4 mmol scale) Purified by column chromatography using 19:1 hexane:EtOAc. Isolated yield: 85%, 44 mg. TLC  $R_f$  = 0.6 (4:1 hexane:EtOAc).  $^1\text{H}$  NMR (500 MHz,  $\text{CDCl}_3$ )  $\delta$  2.41 – 2.37 (m, 4H), 1.89 – 1.83 (m, 4H), 1.56 – 1.50 (m, 4H), 1.39 – 1.32 (m, 2H).  $^{13}\text{C}$  NMR (126 MHz,  $\text{CDCl}_3$ )  $\delta$  218.48, 42.06, 27.28, 25.78, 24.83. GC-MS (EI)  $m/z$ :  $M^+$  peak: 126.01, base peak: 97.99,  $t_R$ : 7.36 min.

$^1\text{H}$  NMR:

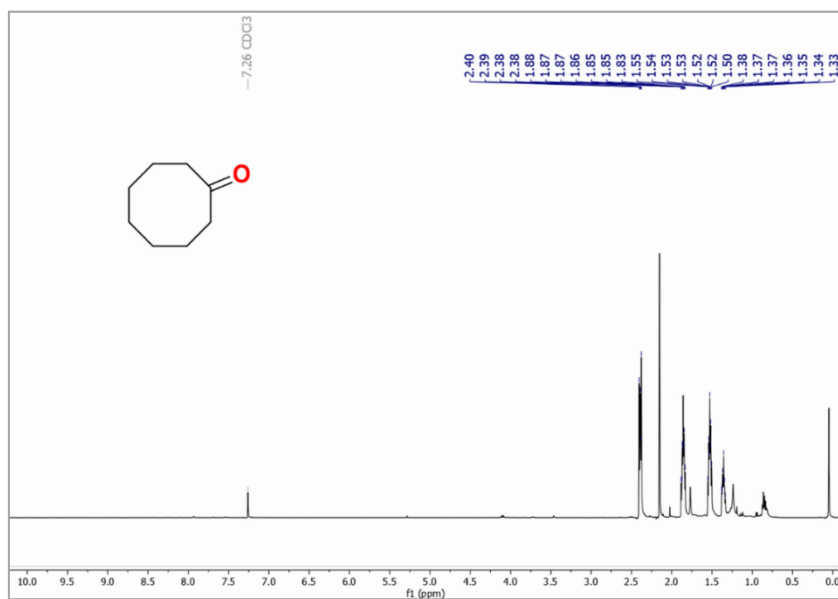

$^{13}\text{C}$  NMR:

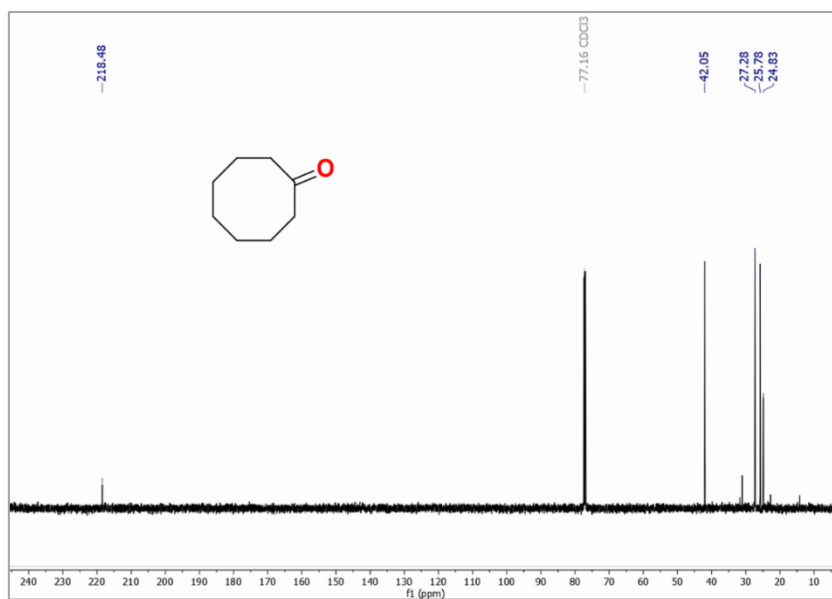

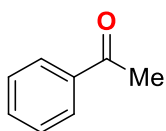

18. Acetophenone<sup>16</sup> (Table 2, entry 18): (0.4 mmol scale) Purified by column chromatography using 19:1 hexane:EtOAc. Isolated yield: 93%, 45 mg. TLC  $R_f$  = 0.6 (9:1 hexane: EtOAc).  $^1\text{H}$  NMR (500 MHz,  $\text{CDCl}_3$ )  $\delta$  7.91 (d,  $J$  = 7.2 Hz, 2H), 7.51 (t,  $J$  = 7.4 Hz, 1H), 7.41 (t,  $J$  = 7.7 Hz, 2H), 2.55 (s, 3H).  $^{13}\text{C}$  NMR (126 MHz,  $\text{CDCl}_3$ )  $\delta$  198.09, 137.07, 133.06, 128.52, 128.24, 26.51. GC-MS (EI)  $m/z$ :  $\text{M}^+$  peak: 120.09, base peak: 105.07,  $t_R$ : 5.69 min.

$^1\text{H}$  NMR:

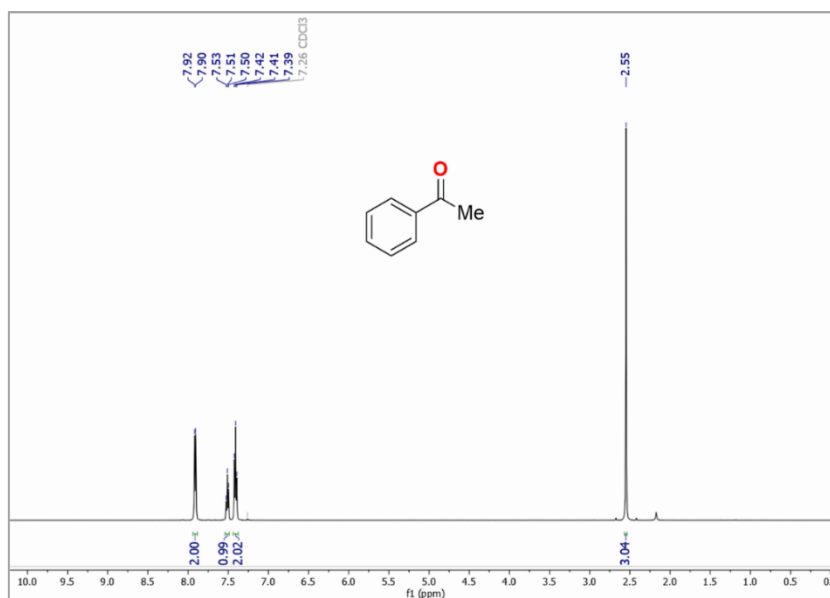

$^{13}\text{C}$  NMR:

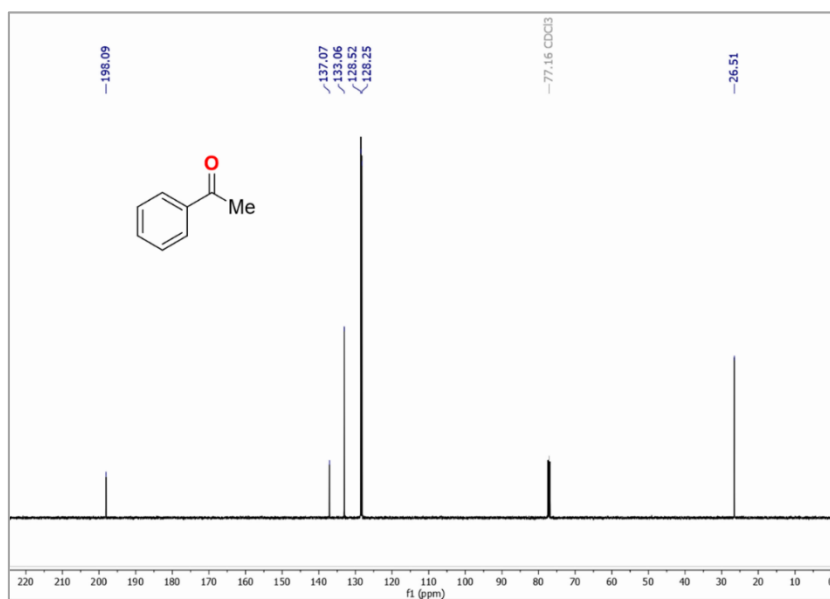



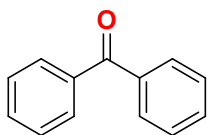

19. *Benzophenone*<sup>16</sup> (Table 2, entry 19): (0.3 mmol scale) Purified by column chromatography using 19:1 hexane:EtOAc. Isolated yield: 92%, 50 mg. TLC  $R_f = 0.7$  (4:1 hexane:EtOAc).  $^1\text{H}$  NMR (500 MHz,  $\text{CDCl}_3$ )  $\delta$  7.81 (d,  $J = 8.5$  Hz, 4H), 7.58 (t,  $J = 7.4$  Hz, 2H), 7.48 (t,  $J = 7.7$  Hz, 4H).  $^{13}\text{C}$  NMR (126 MHz,  $\text{CDCl}_3$ )  $\delta$  196.81, 137.68, 132.49, 130.13, 128.36. GC-MS (ESI)  $m/z$ :  $\text{M}^+$  peak: 182.21, base peak: 105.06, tR: 11.3 min.

$^1\text{H}$  NMR:

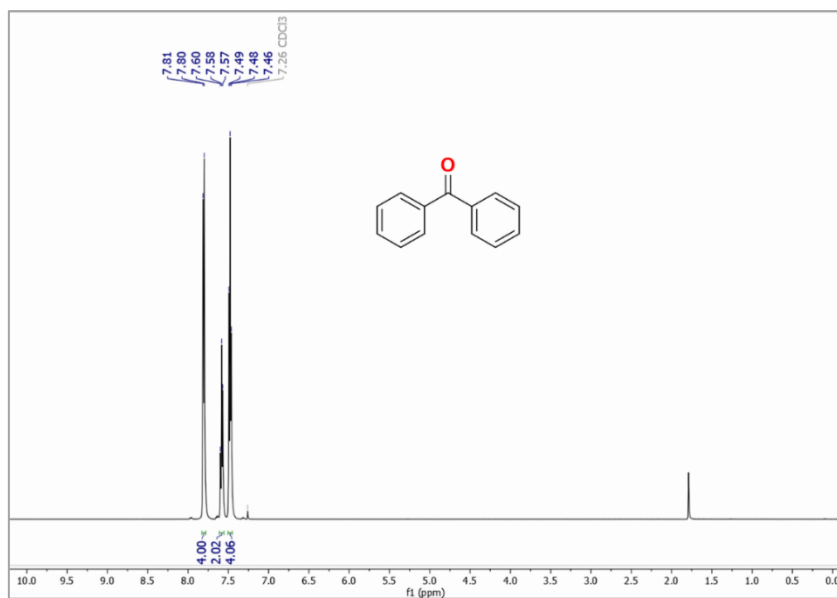

$^{13}\text{C}$  NMR:

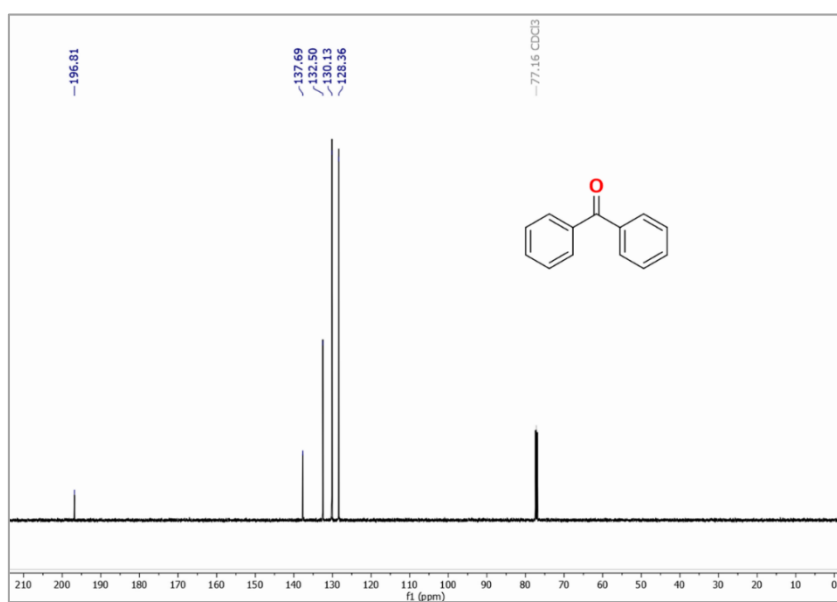

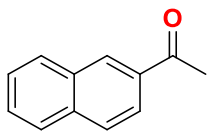

20. *1-(naphthalen-2-yl)ethenone*<sup>16</sup> (Table 2, entry 20): (0.3 mmol scale) Purified by column chromatography using 11.5:1 hexane:EtOAc. Isolated yield: 86%, 44 mg. TLC  $R_f$  = 0.3 (8:2 hexane:EtOAc).  $^1\text{H}$  NMR (500 MHz,  $\text{CDCl}_3$ )  $\delta$  8.43 (s, 1H), 8.01 (d,  $J$  = 8.6 Hz, 1H), 7.93 (d,  $J$  = 8.1 Hz, 1H), 7.85 (dd,  $J$  = 8.1, 5.2 Hz, 2H), 7.55 (dt,  $J$  = 23.7, 7.1 Hz, 2H), 2.70 (s, 3H).  $^{13}\text{C}$  NMR (126 MHz,  $\text{CDCl}_3$ )  $\delta$  198.04, 135.61, 134.54, 132.55, 130.20, 129.58, 128.43, 127.80, 126.79, 123.92, 26.67. GC-MS (EI)  $m/z$ :  $\text{M}^+$  peak: 170.03, base peak: 155.00, tR: 11.011 min.

$^1\text{H}$  NMR:

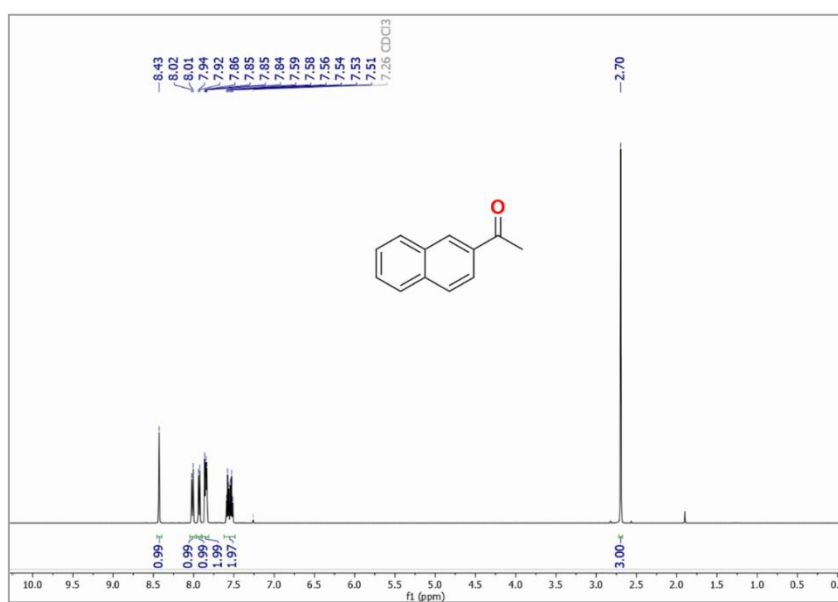

$^{13}\text{C}$  NMR:

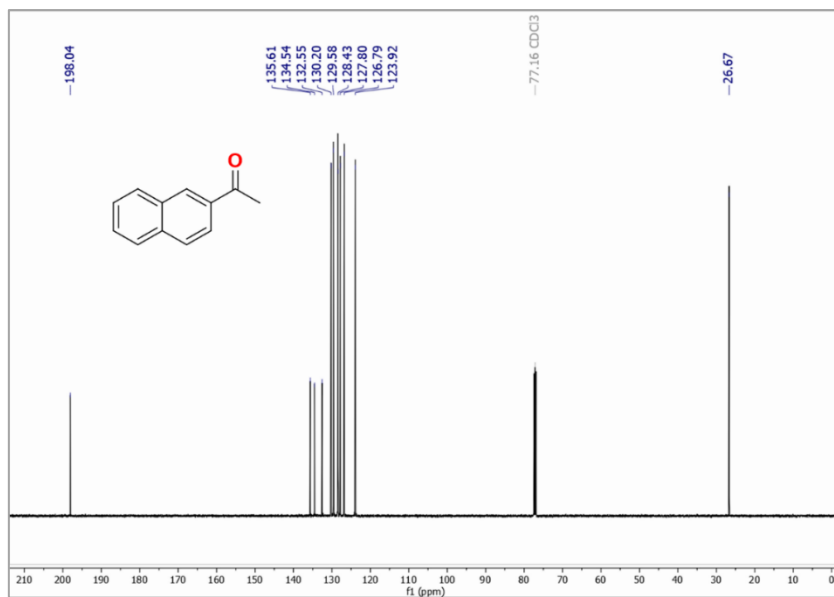

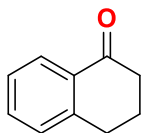

21. *3,4-dihydronaphthalen-1(2H)-one*<sup>16</sup> (Table 2, entry 21): (0.4 mmol scale) Purified by column chromatography using 19:1 hexane:EtOAc. Isolated yield: 91%, 53 mg. TLC  $R_f$  = 0.3 (8:2 hexane:EtOAc). <sup>1</sup>H NMR (500 MHz, CDCl<sub>3</sub>) δ 8.02 (d,  $J$  = 7.8 Hz, 1H), 7.45 (t,  $J$  = 7.4 Hz, 1H), 7.28 (t,  $J$  = 7.5 Hz, 1H), 7.23 (d,  $J$  = 7.6 Hz, 1H), 2.95 (t,  $J$  = 6.0 Hz, 2H), 2.64 (t,  $J$  = 6.5 Hz, 2H), 2.12 (p,  $J$  = 6.2 Hz, 2H). <sup>13</sup>C NMR (126 MHz, CDCl<sub>3</sub>) δ 198.31, 144.51, 133.39, 132.65, 128.80, 127.15, 126.62, 39.18, 29.72, 23.31. GC-MS (EI)  $m/z$ :  $M^+$  peak: 146.07, base peak: 118.04,  $t_R$ : 8.86 min.

<sup>1</sup>H NMR:

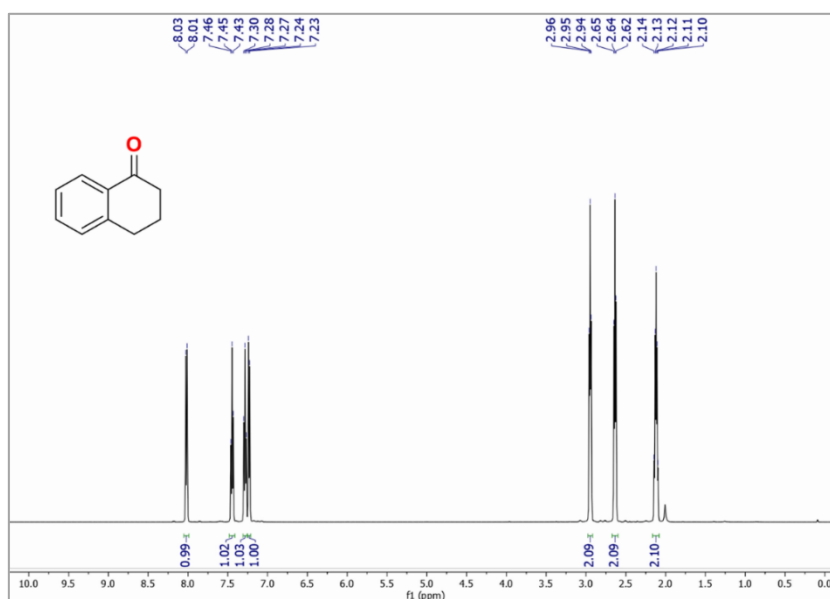

<sup>13</sup>C NMR:

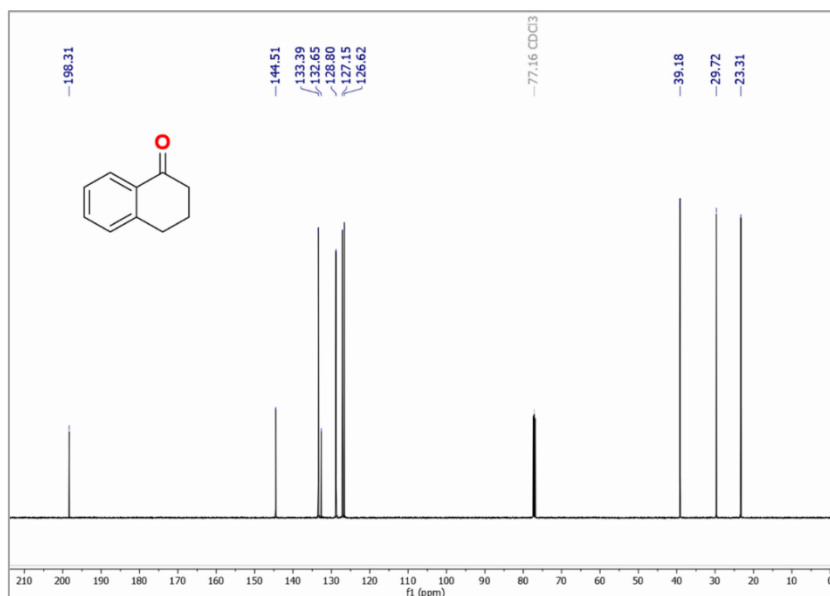

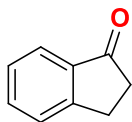

22. 2,3-dihydro-1H-inden-1-one<sup>16</sup> (Table 2, entry 22): (0.4 mmol scale) Purified by column chromatography using 11.5:1 hexane:EtOAc. Isolated yield: 85%, 45 mg. TLC  $R_f$  = 0.4 (9:1 hexane:EtOAc). <sup>1</sup>H NMR (500 MHz, CDCl<sub>3</sub>)  $\delta$  7.74 (d,  $J$  = 7.7 Hz, 1H), 7.59 – 7.53 (m, 1H), 7.46 (d,  $J$  = 7.7 Hz, 1H), 7.34 (t,  $J$  = 7.4 Hz, 1H), 3.15 – 3.09 (m, 2H), 2.69 – 2.63 (m, 2H). <sup>13</sup>C NMR (126 MHz, CDCl<sub>3</sub>)  $\delta$  207.09, 155.23, 134.66, 127.35, 126.78, 123.77, 36.29, 25.88. GC-MS (EI)  $m/z$ : M<sup>+</sup> peak: 132.10, base peak: 104.11, tR: 7.97 min.

<sup>1</sup>H NMR:

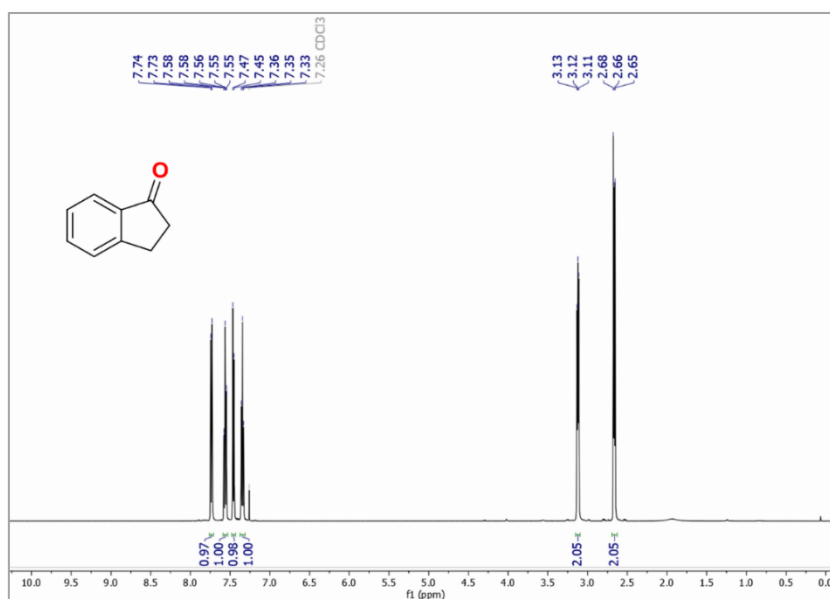

<sup>13</sup>C NMR:

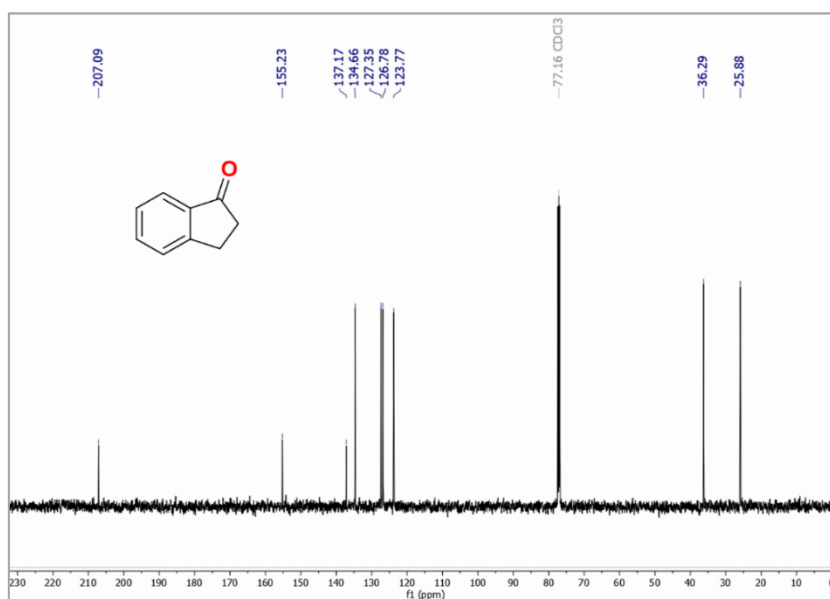

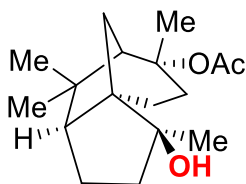

23. 3-hydroxy-3,6,8,8-tetramethyloctahydro-1H-3a,7-methanoazulen-6-yl acetate<sup>9</sup> (Table 2, entry 23): (0.3 mmol scale) Purified by column chromatography using 7:1 hexane:Et<sub>2</sub>O. Isolated yield: 52%, 44 mg. TLC *R<sub>f</sub>* = 0.7 (7:3 hexane:EtOAc). <sup>1</sup>H NMR (400.13 MHz, CDCl<sub>3</sub>, δ, ppm) δ 2.44-2.43 (d, 1H, *J* = 5.49 Hz), 2.10-2.05 (dd, 1H, *J* = 18.50 Hz), 1.95 (s, 3H), 1.92-1.89 (m, 2H), 1.86-1.81 (m, 2H), 1.62-1.58 (m, 2H), 1.55 (s, 3H), 1.52-1.48 (m, 2H), 1.44-1.36 (m, 1H), 1.30-1.25 (m, 2H), 1.17 (s, 3H), 1.15 (s, 3H), 1.02 (s, 3H); <sup>13</sup>C NMR (100.61 MHz, CDCl<sub>3</sub>) δ 170.36, 85.85, 79.37, 57.32, 54.85, 53.69, 44.81, 41.19, 35.67, 33.52, 29.56, 27.91, 26.69, 25.83, 24.16, 22.69, 21.44 ppm; HRMS (ESI) *m/z* calc'd C<sub>17</sub>H<sub>28</sub>O<sub>3</sub>Na [M+Na]<sup>+</sup>: 303.1931, found 303.1929.

<sup>1</sup>H NMR:

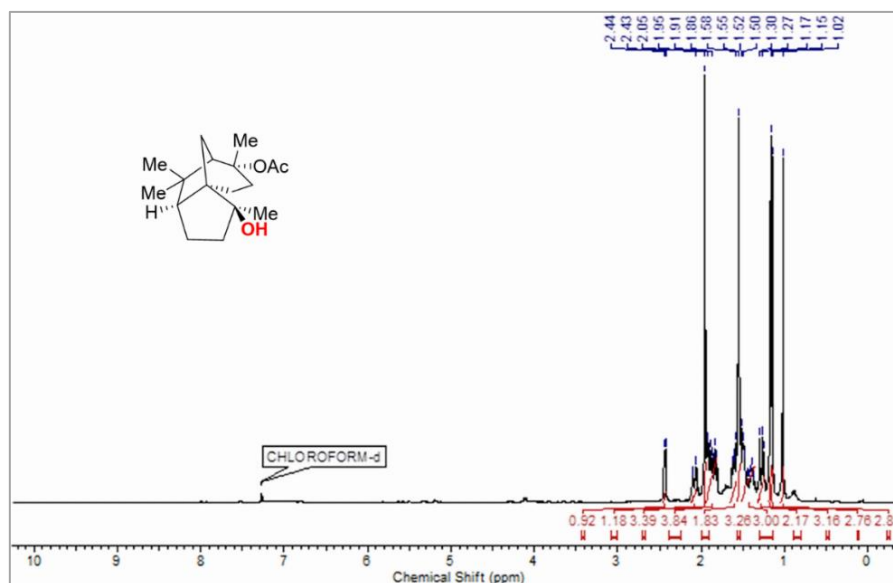

<sup>13</sup>C NMR:

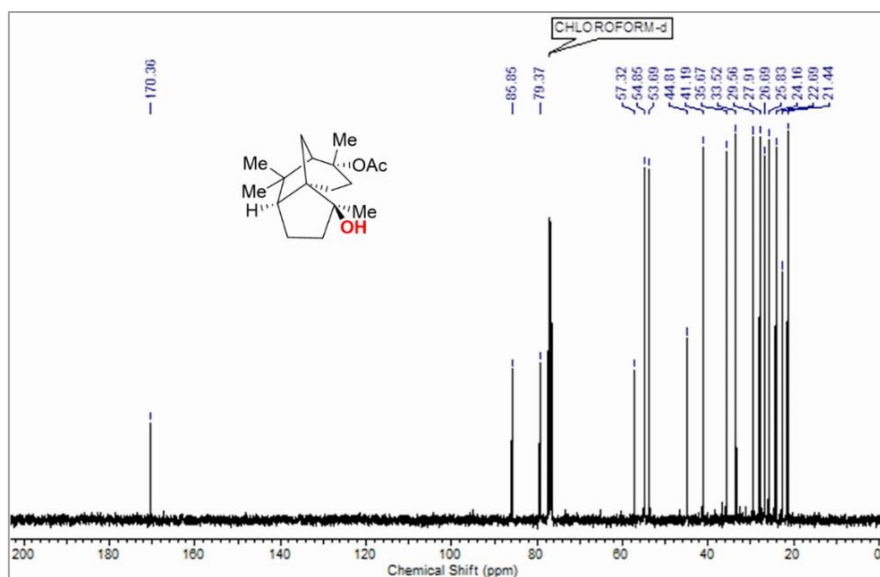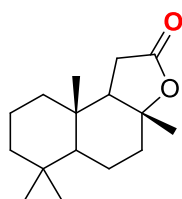

24. *(3aR)*-*(+)*-*Sclareolide*<sup>9</sup> (Table 2, entry 24): (0.25 mmol scale) Purified by column chromatography using 19:1 hexane:EtOAc. Isolated yield: 72%, 45 mg. TLC  $R_f$  = 0.5 (9:1 hexane:EtOAc).  $^1\text{H}$  NMR (500 MHz,  $\text{CDCl}_3$ )  $\delta$  2.44 – 2.34 (m, 1H), 2.23 (dd,  $J$  = 16.2, 6.5 Hz, 1H), 2.07 (dt,  $J$  = 11.9, 3.3 Hz, 1H), 1.96 (dd,  $J$  = 14.8, 6.5 Hz, 1H), 1.87 (dq,  $J$  = 14.2, 3.1 Hz, 1H), 1.68 (ddt,  $J$  = 17.4, 9.9, 4.0 Hz, 2H), 1.49 – 1.34 (m, 4H), 1.33 (d,  $J$  = 1.0 Hz, 3H), 1.19 (td,  $J$  = 13.6, 4.4 Hz, 1H), 1.07 (d,  $J$  = 2.8 Hz, 1H), 1.03 (dd,  $J$  = 12.9, 3.3 Hz, 1H), 0.91 (s, 3H), 0.88 (s, 3H), 0.83 (s, 3H).  $^{13}\text{C}$  NMR (126 MHz,  $\text{CDCl}_3$ )  $\delta$  177.01, 86.52, 59.26, 56.80, 42.31, 39.65, 38.86, 36.20, 33.30, 33.26, 28.85, 21.70, 21.05, 20.69, 18.22, 15.20. HRMS (ESI)  $m/z$  calc'd  $\text{C}_{16}\text{H}_{26}\text{O}_2\text{Na}$   $[\text{M}+\text{Na}]^+$ : 273.1825, found 273.1823.

$^1\text{H}$  NMR:

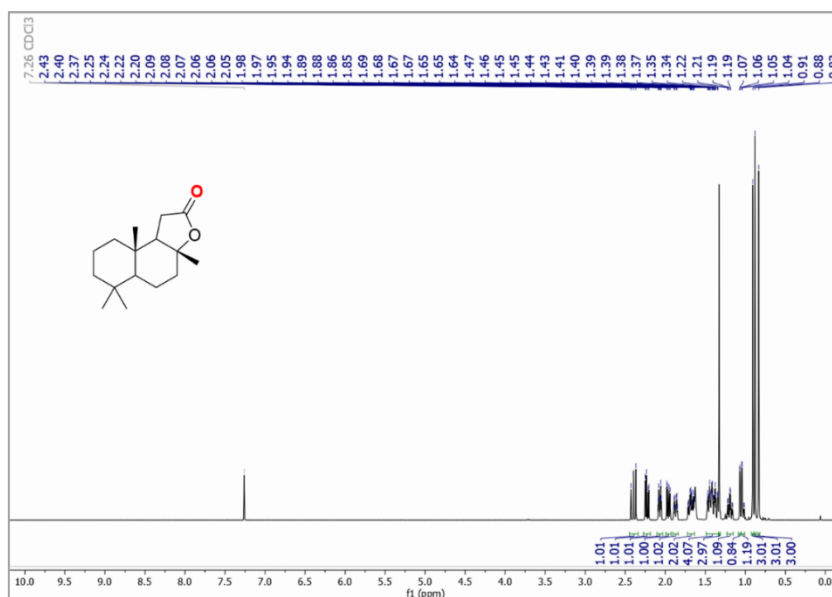

$^{13}\text{C}$  NMR:

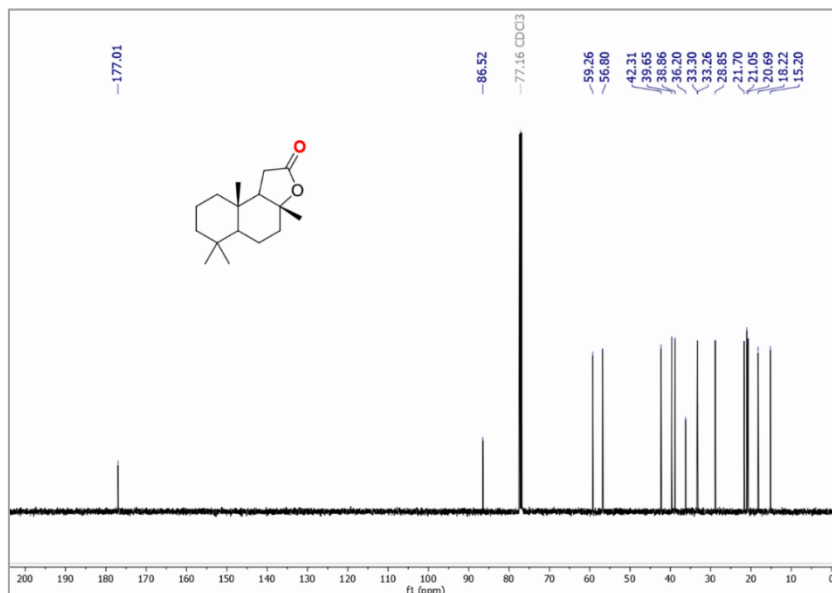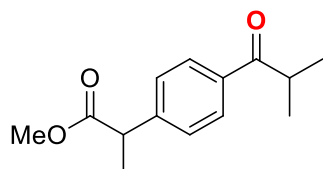

25. *Methyl-2-(4-isobutyrylphenyl)propanoate*<sup>9</sup> (Table 2, entry 25): (0.27 mmol scale) Purified by column chromatography using 6:1 hexane:EtOAc. Isolated yield: 65%, 42 mg. TLC  $R_f$  = 0.6 (7:3 hexane:EtOAc).  $^1\text{H}$  NMR (500 MHz,  $\text{CDCl}_3$ )  $\delta$  7.92 (d,  $J$  = 8.4 Hz, 2H), 7.39 (d,  $J$  = 8.4 Hz, 2H), 3.79 (q,  $J$  = 7.2 Hz, 1H), 3.67 (s, 3H), 3.53 (hept,  $J$  = 6.9 Hz, 1H), 1.52 (d,  $J$  = 7.2 Hz, 3H), 1.21 (d,  $J$  = 6.9 Hz, 6H).  $^{13}\text{C}$  NMR (100.61 MHz,  $\text{CDCl}_3$ )  $\delta$  203.97, 174.32, 144.94, 135.14, 128.77, 127.81, 52.22, 45.41, 35.34, 19.14, 18.14 ppm. HRMS (ESI)  $m/z$  calc'd  $\text{C}_{14}\text{H}_{19}\text{O}_3$   $[\text{M}+\text{H}]^+$ : 235.1329, found 235.1330.

$^1\text{H}$  NMR:

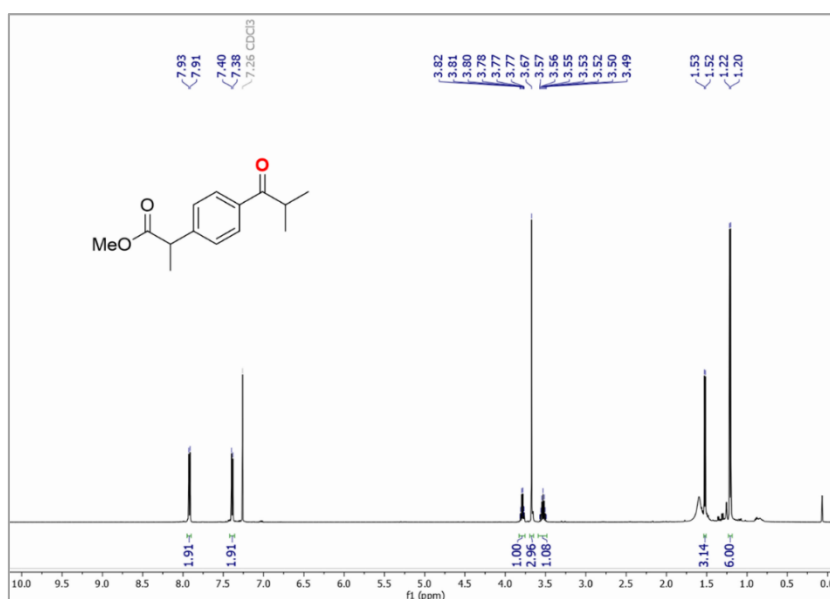

$^{13}\text{C}$  NMR:

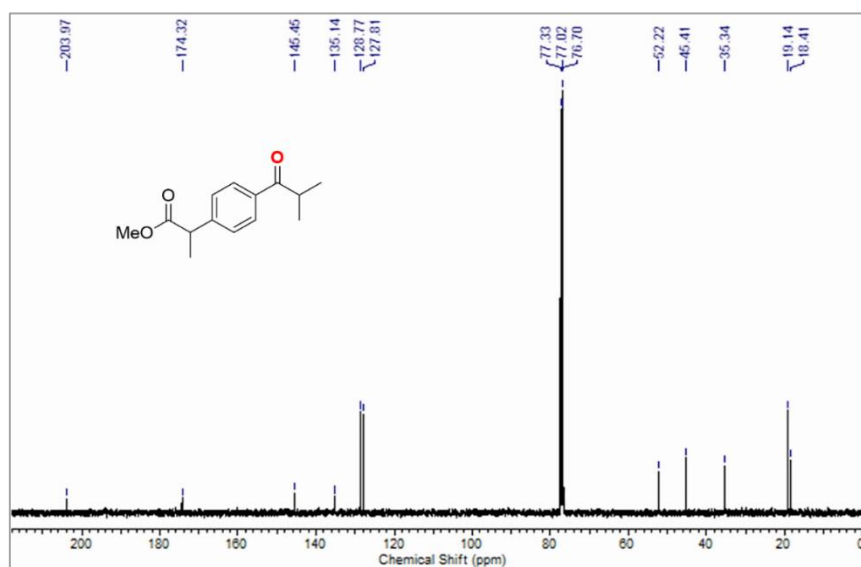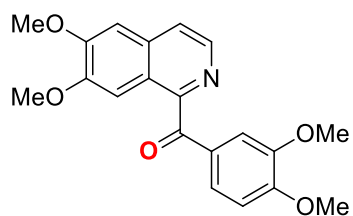

26. 6,7-dimethoxyisoquinolin-1-yl(3,4-dimethoxyphenyl)methanone<sup>9</sup> (Table 2, entry 26): (0.2 mmol scale) Purified by column chromatography using 1:1 hexane:EtOAc. Isolated yield: 85%, 60 mg. TLC  $R_f$  = 0.5 (3:2 hexane:EtOAc).  $^1\text{H}$  NMR (400.13 MHz,  $\text{DMSO-d}_6$ )  $\delta$  8.41-8.40 (d, 1H,  $J$  = 5.38 Hz), 7.87-7.85 (d, 1H,  $J$  = 5.38 Hz), 7.58 (s, 1H), 7.50 (s, 1H), 7.30 (s, 1H), 7.26-7.24 (d, 1H,  $J$  = 8.31 Hz), 7.04-7.02 (1H, d,  $J$  = 8.31 Hz), 3.96 (s, 3H), 3.84 (s, 3H),



3.83 (s, 3H), 3.80 (s, 3H) ppm;  $^{13}\text{C}$  NMR (100.61 MHz, DMSO- $d_6$ )  $\delta$  193.67, 154.05, 153.36, 151.16, 149.13, 140.27, 133.89, 129.58, 127.05, 122.16, 121.05, 111.81, 111.15, 106.02, 103.64, 56.35, 55.98, 55.61 ppm; HRMS (ESI)  $m/z$  calc'd  $\text{C}_{20}\text{H}_{20}\text{O}_5\text{N}$   $[\text{M}+\text{H}]^+$ : 354.1336, found 354.1334.

$^1\text{H}$  NMR:

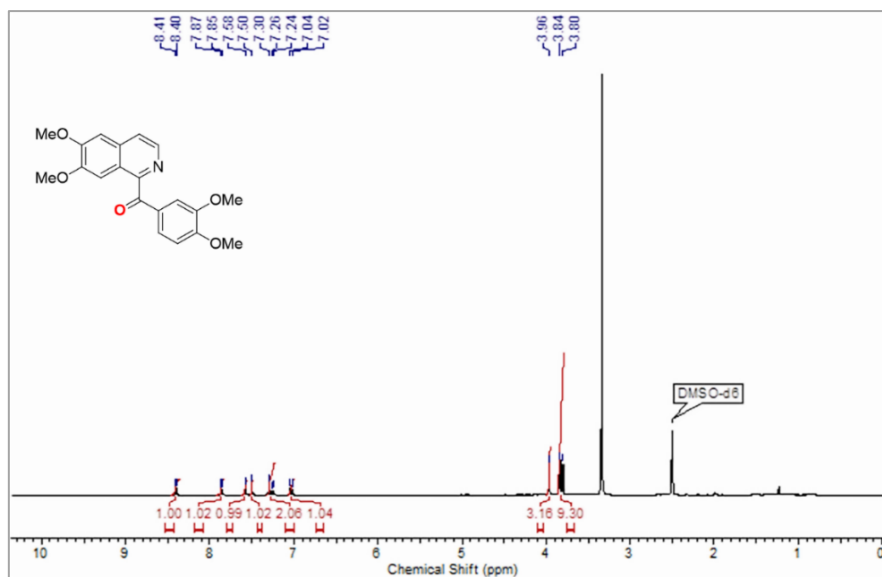

$^{13}\text{C}$  NMR:

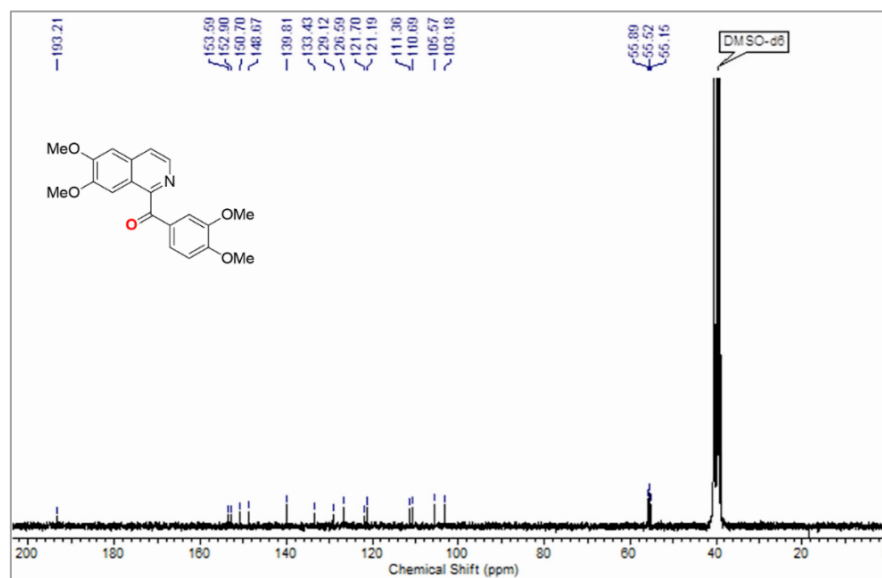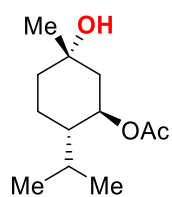

27. (1*R*,2*S*,5*S*)-5-hydroxy-2-isopropyl-5-methylcyclohexyl acetate<sup>9</sup> (Table 2, entry 27a): Purified by column chromatography using 8:1 hexane:EtOAc. Overall isolated yield (27a + 27b) (0.4 mmol scale): 62%, 53 mg. TLC  $R_f$  = 0.4 (4:1 hexane:EtOAc). <sup>1</sup>H NMR (500 MHz, CDCl<sub>3</sub>) δ 4.98 (td,  $J$  = 10.9, 4.6 Hz, 1H), 2.02 (s, 3H), 1.90 – 1.85 (m, 1H), 1.67 (d,  $J$  = 13.7 Hz, 1H), 1.53 – 1.47 (m, 2H), 1.39 – 1.31 (m, 3H), 1.31 – 1.27 (m, 1H), 1.25 (s, 1H), 1.23 (s, 3H), 0.91 (d,  $J$  = 7.2 Hz, 3H), 0.80 (d,  $J$  = 7.0 Hz, 3H). <sup>13</sup>C NMR (126 MHz, CDCl<sub>3</sub>) δ 170.83, 72.09, 71.18, 47.10, 44.73, 37.98, 31.53, 26.48, 21.44, 20.89, 19.50, 16.64. HRMS (ESI)  $m/z$  calc'd C<sub>12</sub>H<sub>22</sub>O<sub>3</sub>Na [M+Na]<sup>+</sup>: 237.1461, found 237.1460.

<sup>1</sup>H NMR:

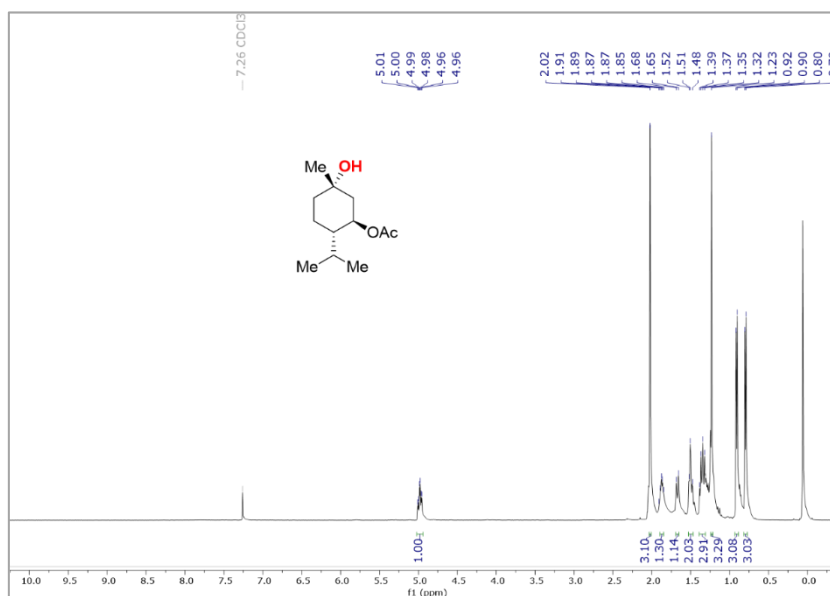

<sup>13</sup>C NMR:

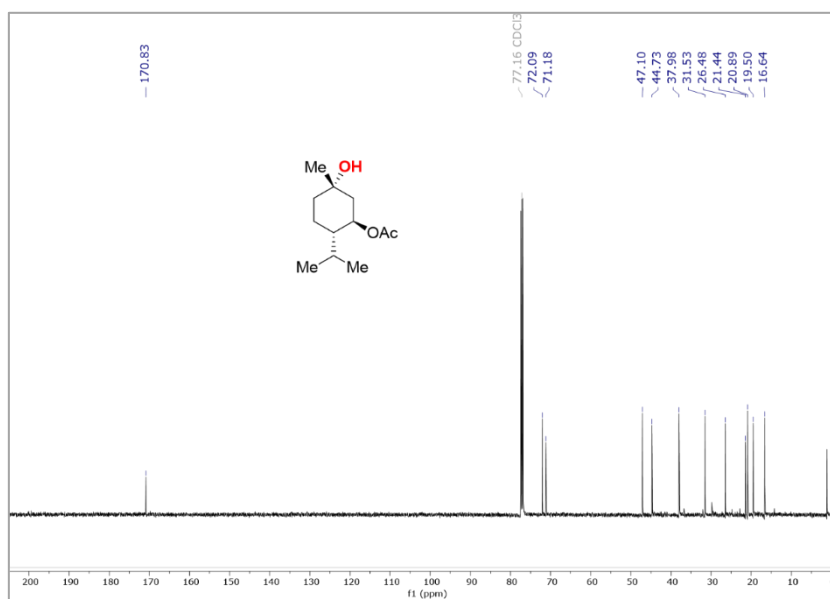

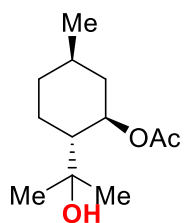

(Table 2, entry 27b)  $^1\text{H}$  NMR (500 MHz,  $\text{CDCl}_3$ )  $\delta$  4.81 (td,  $J = 10.8, 4.2$  Hz, 1H), 2.06 (s, 3H), 1.89 (dd,  $J = 13.2, 3.4$  Hz, 1H), 1.72 – 1.63 (m, 3H), 1.55 – 1.49 (m, 1H), 1.25 (s, 3H), 1.15 (s, 3H), 1.13 (s, 3H), 1.02 (s, 1H), 0.90 (d,  $J = 6.7$  Hz, 3H).  $^{13}\text{C}$  NMR (126 MHz,  $\text{CDCl}_3$ )  $\delta$  169.93, 76.35, 73.20, 51.73, 41.06, 34.42, 31.44, 28.74, 27.28, 25.81, 21.85.

$^1\text{H}$  NMR:

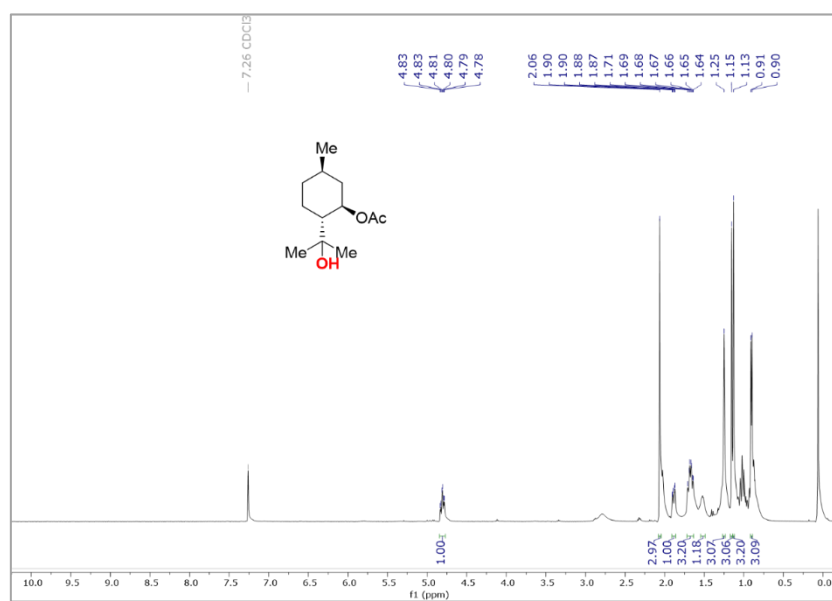

$^{13}\text{C}$  NMR:

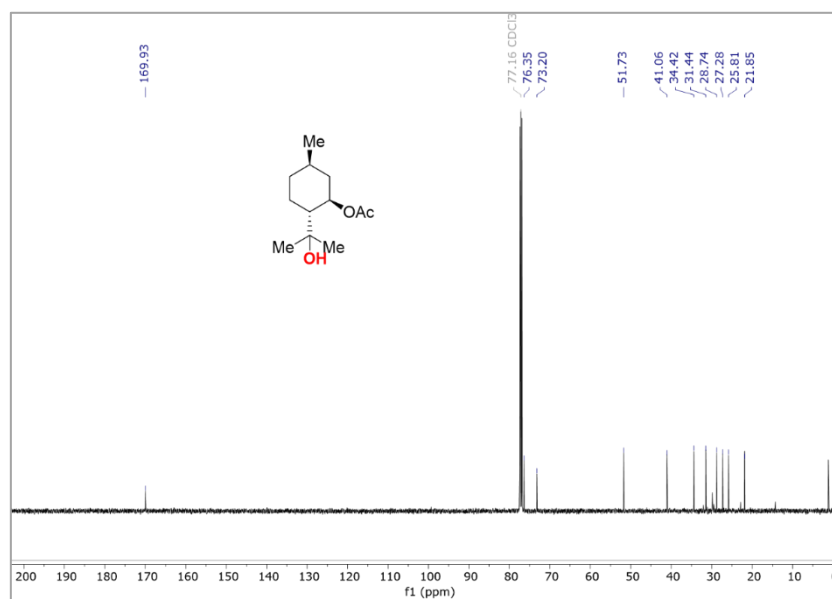

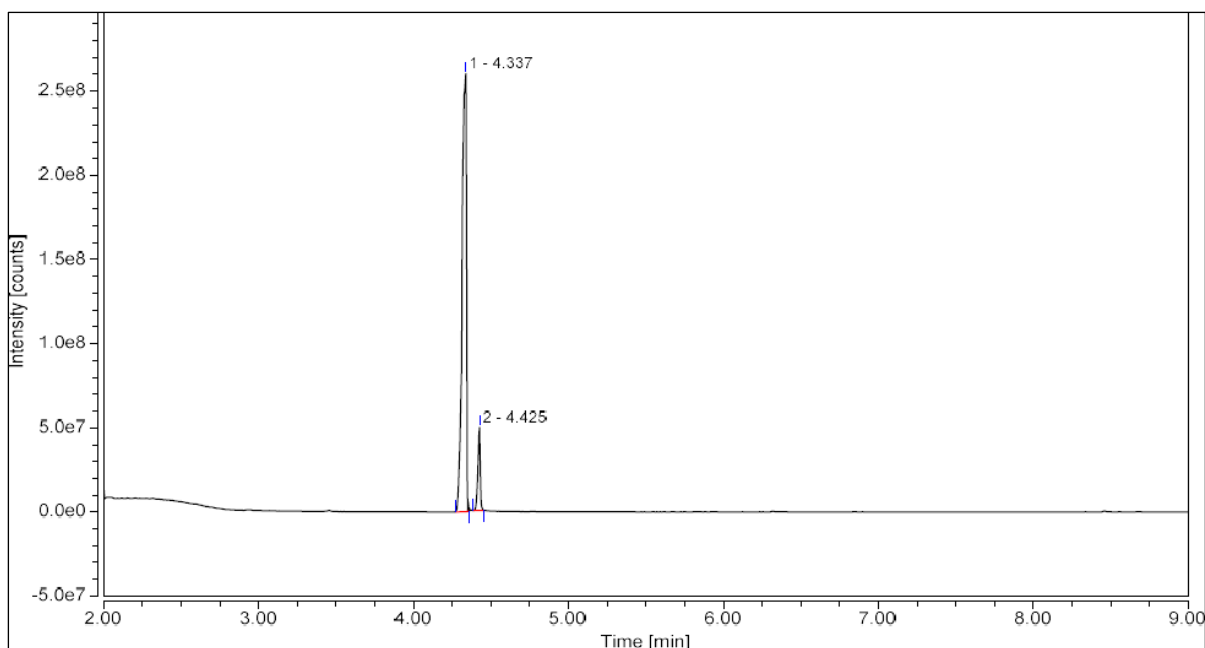

Figure S57. GC-MS chromatogram after reaction with cyclohexane.

#### 4. References

1. W. L. F. Armarego, D. D. Perrin, *Purification of Laboratory Chemicals*. **2009**, 6th edition, Elsevier Science, USA.
2. O. V. Dolomanov, L. J. Bourhis, R. J. Gildea, J. A. K. Howard, H. Puschmann, OLEX2: a complete structure solution, refinement and analysis program. *J. Appl. Crystallogr.* **2009**, *42*, 339-341.
3. G. M. Sheldrick, *Acta Crystallogr., Sect. A: Found. Adv.*, 2015, **71**, 3–8.
4. G. M. Sheldrick, *Acta Crystallogr., Sect. A: Found. Crystallogr.* 2008, **64**, 112– 122.
5. S. Pattanayak, A. J. Jasniewski, A. Rana, A. Draksharapu, K. K. Singh, A. Weitz, M. Hendrich, Que, L., A. Dey, S. Sen Gupta, *Inorg. Chem.* 2017, **56 (11)**, 6352-6361.
6. S. Connolly, A. Fisher, A. Humphries, A. J. Watts, K. E. Wiley, *Preparation and pharmaceutical composition comprising a 4-hydroxy-2-oxo-2,3-dihydro-1,3-benzothiazol-7-yl compound for modulation of beta2-adrenoreceptor activity*, **2009**, World Intellectual Property Organization, WO2009154562 A1.
7. S. Raghavan, J. E. Stelmach, C. J. Smith, H. Li, A. Whitehead, S. T. Waddell, Yi-H. Chen, S. Miao, O. A. Ornoski, J. Garfinkle, X. Liao, J. Chang, X. Han, J. Guo, J. A. Groeper, L. L. Brockunier, K. Rosauer, E. R. Parmee, *Soluble guanylate cyclase activators*, **2011**, WO 2011149921 A1.
8. C. Panda, M. Ghosh, T. Panda, R. Banerjee, S. Sen Gupta, *Chem. Commun.* 2011, **47 (28)**, 8016-8018.
9. S. Jana, M. Ghosh, M. Ambule, S. Sen Gupta, *Org. Lett.* 2017, **19 (4)**, 746-749.
10. S. Hong, Y.-M. Lee, K.-B. Cho, K. Sundaravel, J. Cho, M. J. Kim, W. Shin, W. Nam, *J. Am. Chem. Soc.* 2011, **133 (31)**, 11876-11879.
11. P. L. Hahn, J. M. Lowe, Y. Xu, K. L. Burns, M. K. Hilinski, *ACS Catal.* 2022, **12 (8)**, 4302-4309.
12. B. H. Brodsky, J. Du Bois, *J. Am. Chem. Soc.* 2005, **127 (44)**, 15391-15393.

13. M. Milan, G. Carboni, M. Salamone, M. Costas, M. Bietti, *ACS Catal.* 2017, **7** (9), 5903-5911.
14. G.-X. Li, C. A. Morales-Rivera, F. Gao, Y. Wang, G. He, P. Liu, G. Chen, *Chem. Sci.* 2017, **8** (10), 7180-7185.
15. V. Dantignana, M. Milan, O. Cussó, A. Company, M. Bietti, M. Costas, *ACS Cent. Sci.* 2017, **3** (12), 1350-1358.
16. J. A. Marko, A. Durgham, S. L. Bretz, W. Liu, *Chem. Commun.* 2019, **55** (7), 937-940.
17. D. F. Evans, D. A. Jakubovic, *J. Chem. Soc., Dalton Trans.* 1988, 2927-2933.
